# Supplementary material for: Design, synthesis, in silico, and in vitro evaluation of pyrrol-2-yl-phenyl allylidene hydrazine carboximidamide derivatives as AChE/BACE 1 dual inhibitors
Source: Royal Society of Chemistry journal article supplement (doi:10.1039/d4ra03589e), 2024-01-01
Supplement: d4ra03589e1.pdf [file d4ra03589e1.pdf]

## Supporting Information

### **Design, synthesis, *in-silico*, and *in-vitro* evaluation of pyrrol-2-yl-phenyl allylidene hydrazine carboximidamide derivatives as AChE/BACE 1 dual inhibitors**

Amit Sharma<sup>1</sup>, Santosh Rudrawar<sup>2, 3</sup>, Ankita Sharma<sup>4</sup>, Sandip B. Bharate<sup>4</sup>, Hemant R. Jadhav<sup>1\*</sup>

<sup>1</sup>Pharmaceutical Chemistry Research Laboratory, Department of Pharmacy, Birla Institute of Technology and Science Pilani, Pilani Campus, Vidya Vihar, Pilani – 333031 (RJ) India

<sup>2</sup>Institute for Glycomics, Griffith University, Gold Coast 4222, Australia

<sup>3</sup>School of Pharmacy and Medical Sciences, Griffith University, Gold Coast 4222, Australia

<sup>4</sup>Natural Products and Medicinal Chemistry Division, CSIR-Indian Institute of Integrative Medicine, Canal Road, Jammu – 181110, India

\**Corresponding author*: Tel: +91-1596-255 506; Fax: +91-1596-244183;

**E-mail:** hemantrj@pilani.bits-pilani.ac.in

$^1\text{H}$  NMR spectrum of compound **1a** in  $\text{DMSO-d}_6$ .

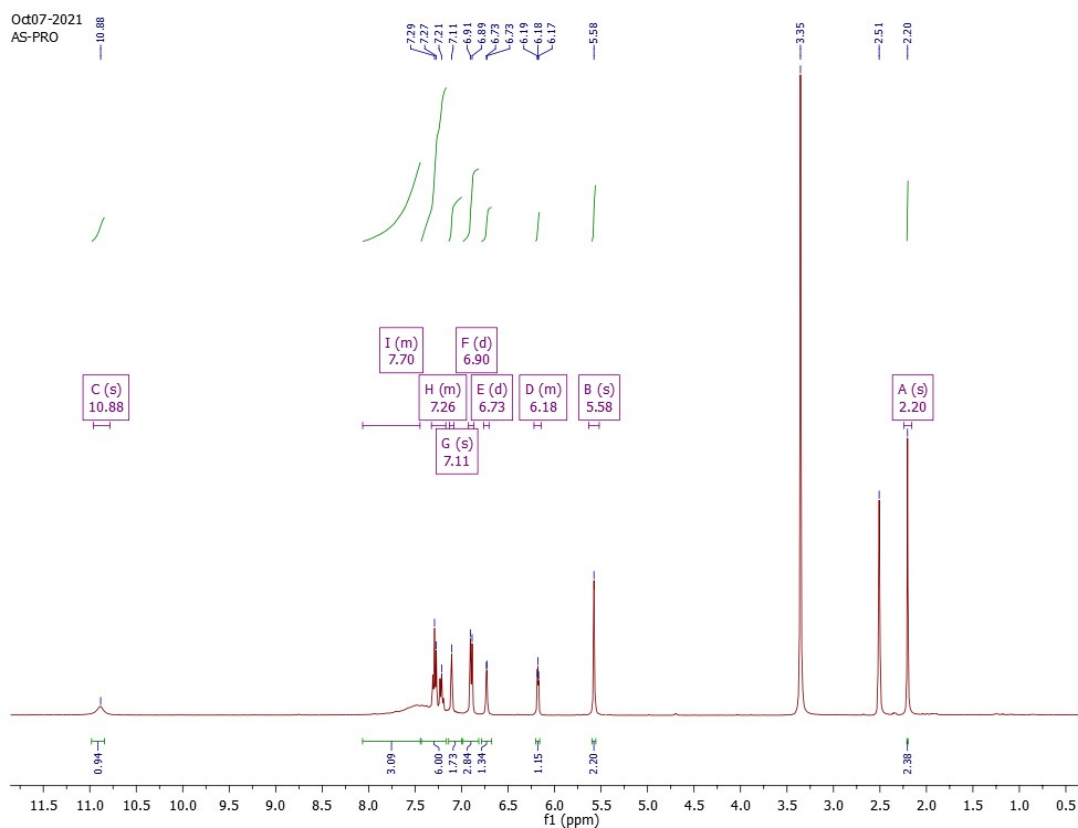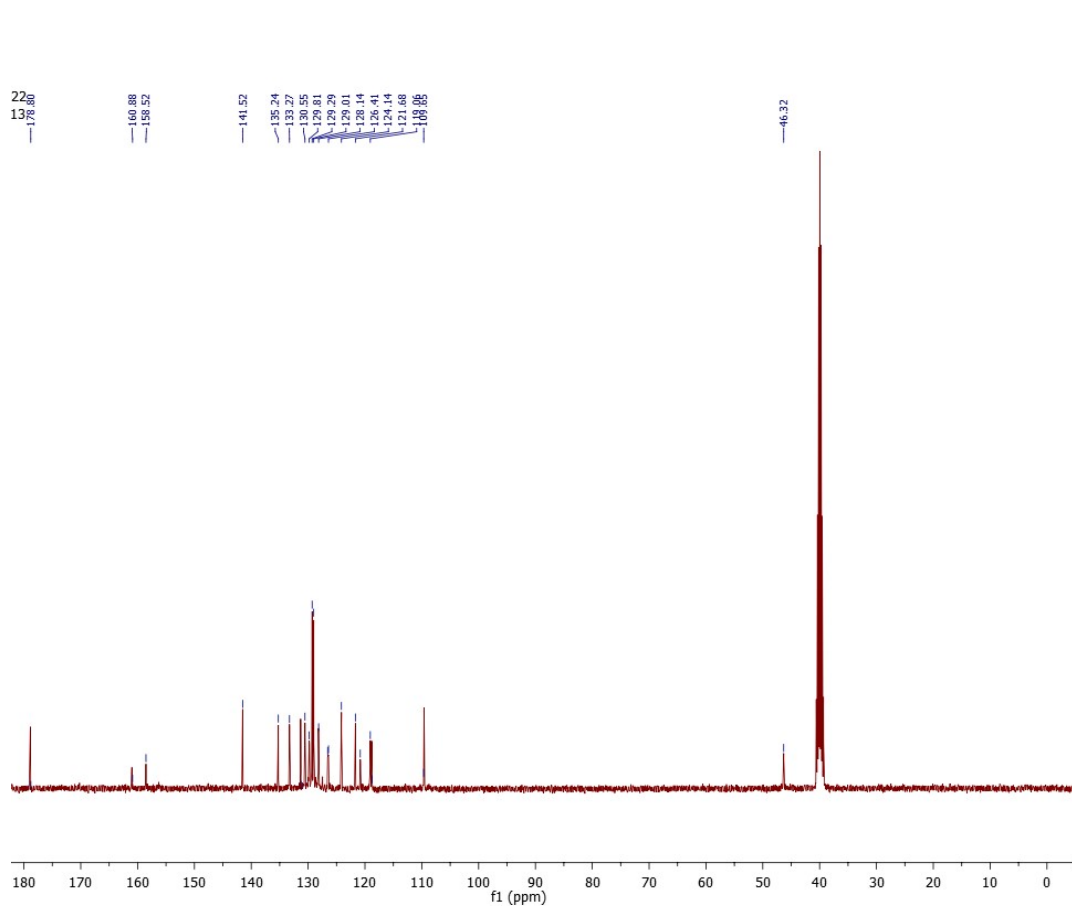

$^{13}\text{C}$   
N  
M  
R  
spe  
ctr  
um  
of  
co  
mp  
ou  
nd  
**1a**  
in  
D  
MS

O-d<sub>6</sub>

MS Zoomed Spectrum

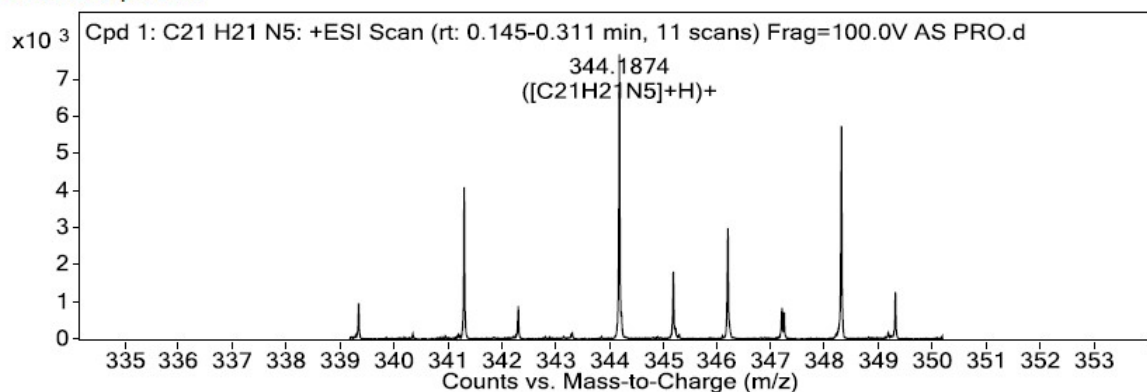

HRMS spectrum of compound **1a**.

<sup>1</sup>H NMR spectrum of compound **1b** in DMSO-d<sub>6</sub>.

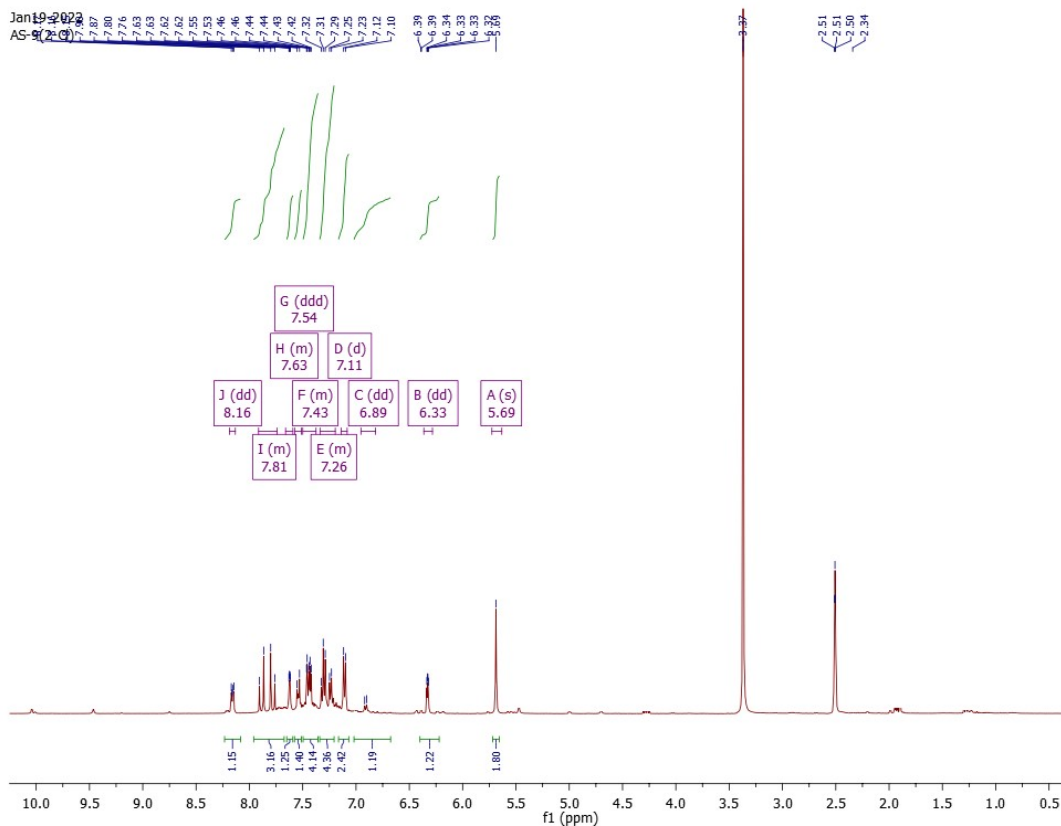

$^{13}\text{C}$  NMR spectrum of compound **1b** in  $\text{DMSO-d}_6$

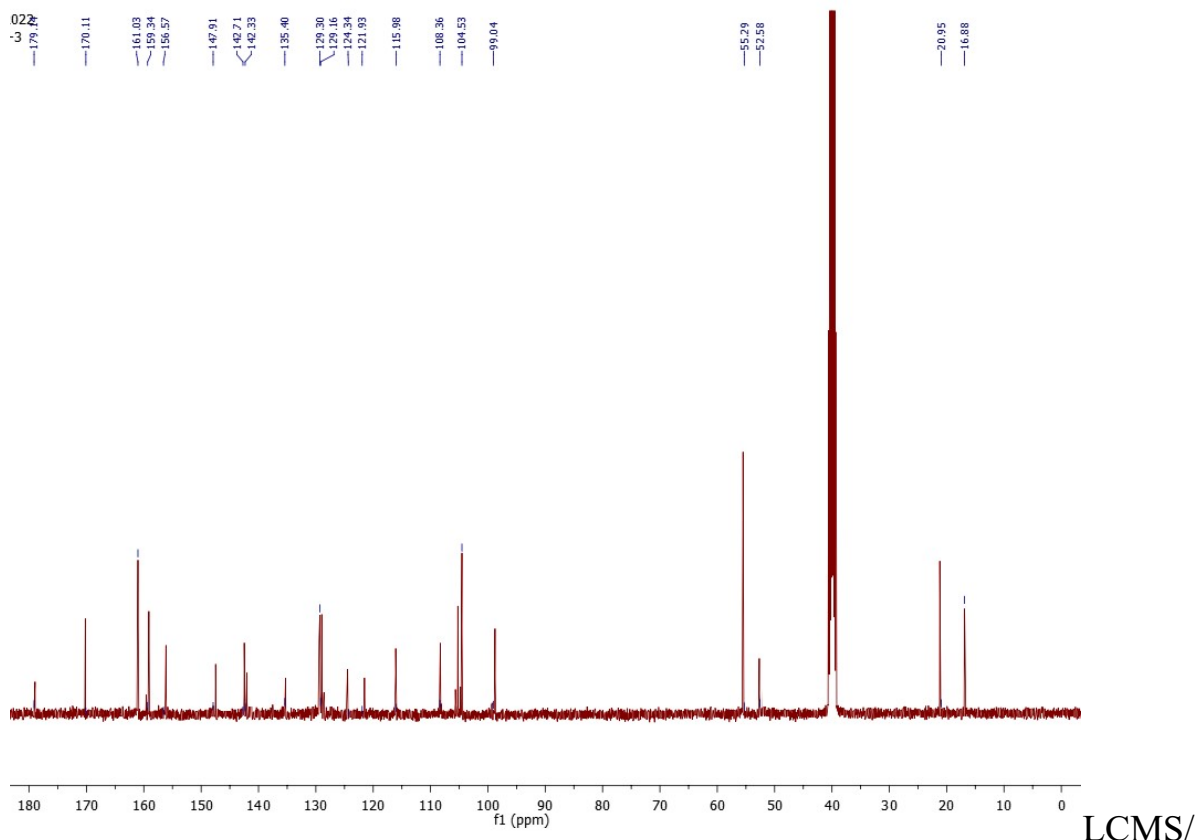

MS spectrum of compound **1b**.

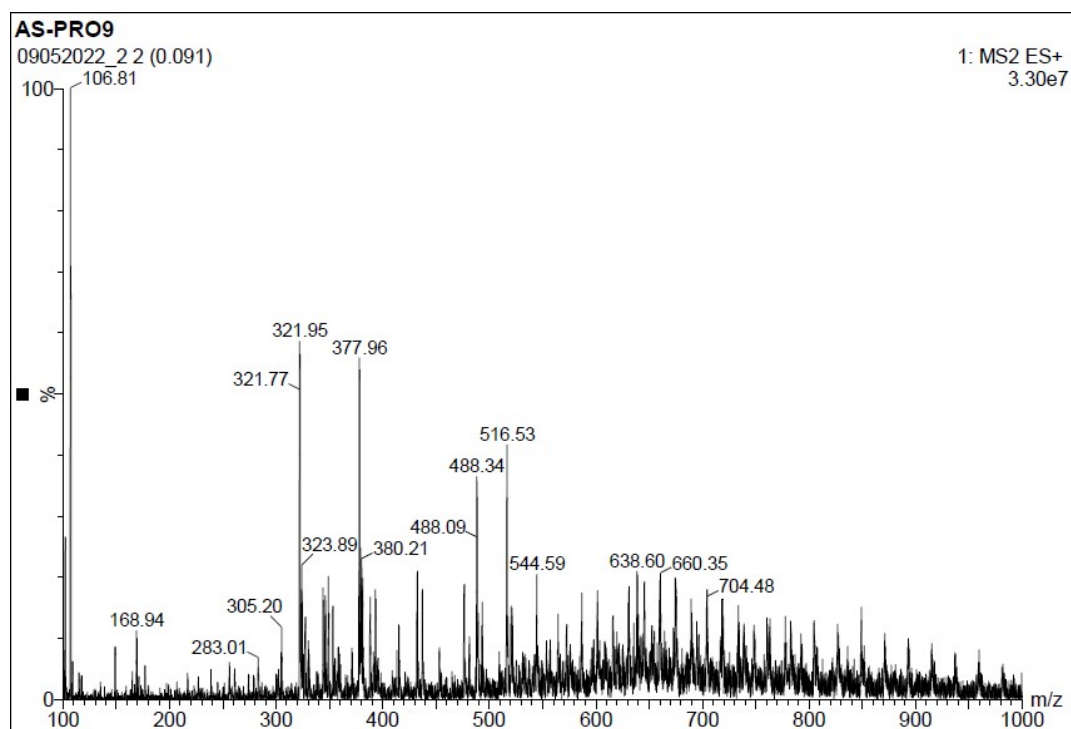

$^1\text{H}$  NMR spectrum of compound **1c** in  $\text{DMSO-d}_6$ .

Jan19-2022 8  
AS-1(4-NO2) 2

A (s)  
10.89  
H

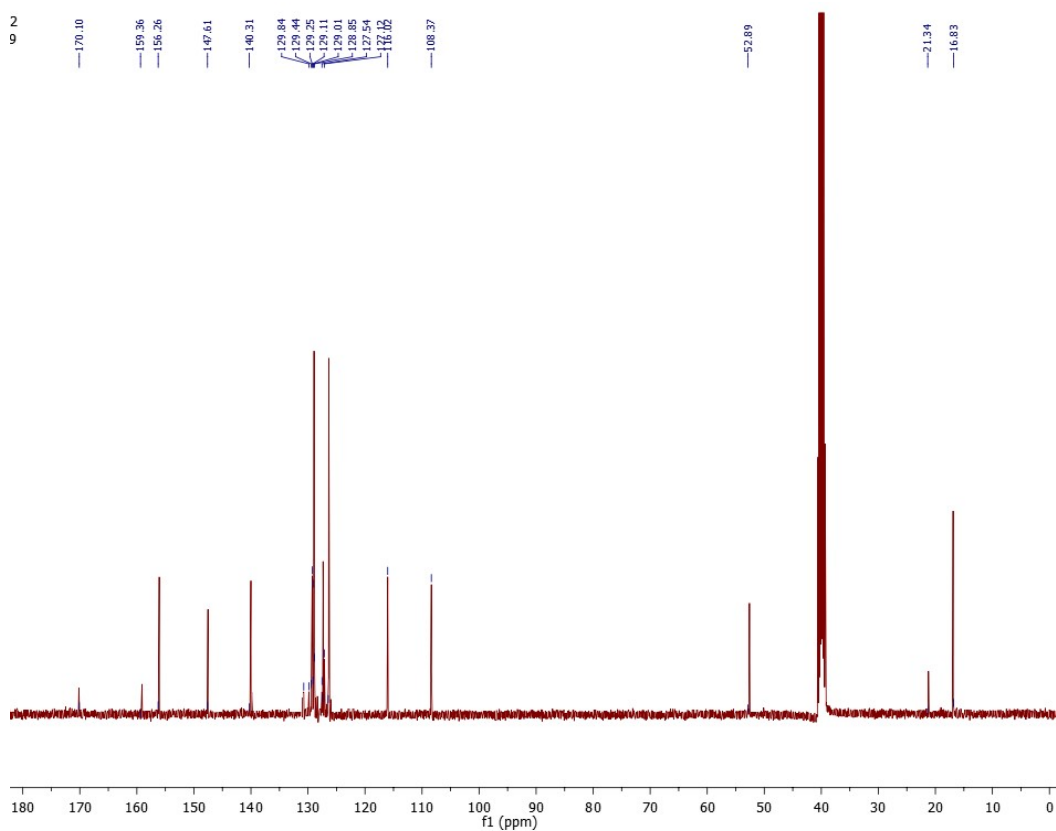

$^{13}\text{C}$   
NMR  
spectrum  
of  
compound **1c**  
in  
 $\text{DMSO-d}_6$

HRMS  
spectrum

S5

m of compound **1c**.

MS Zoomed Spectrum

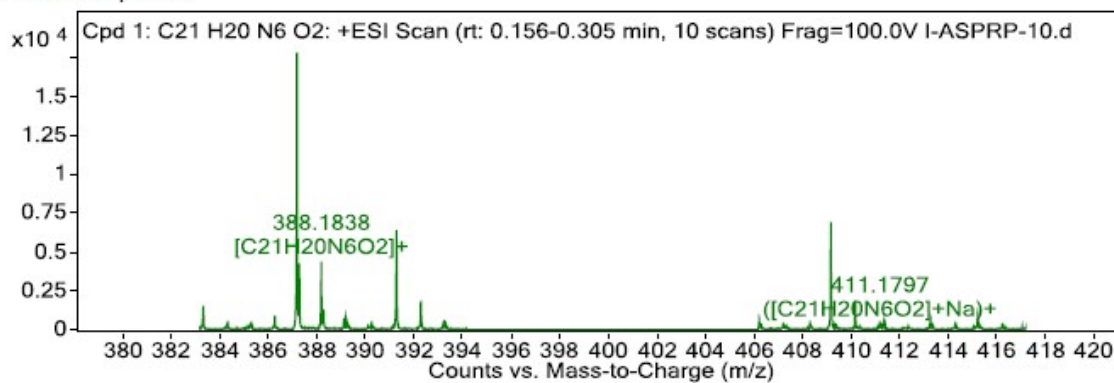

<sup>1</sup>H NMR spectrum of compound **1d** in DMSO-d<sub>6</sub>.

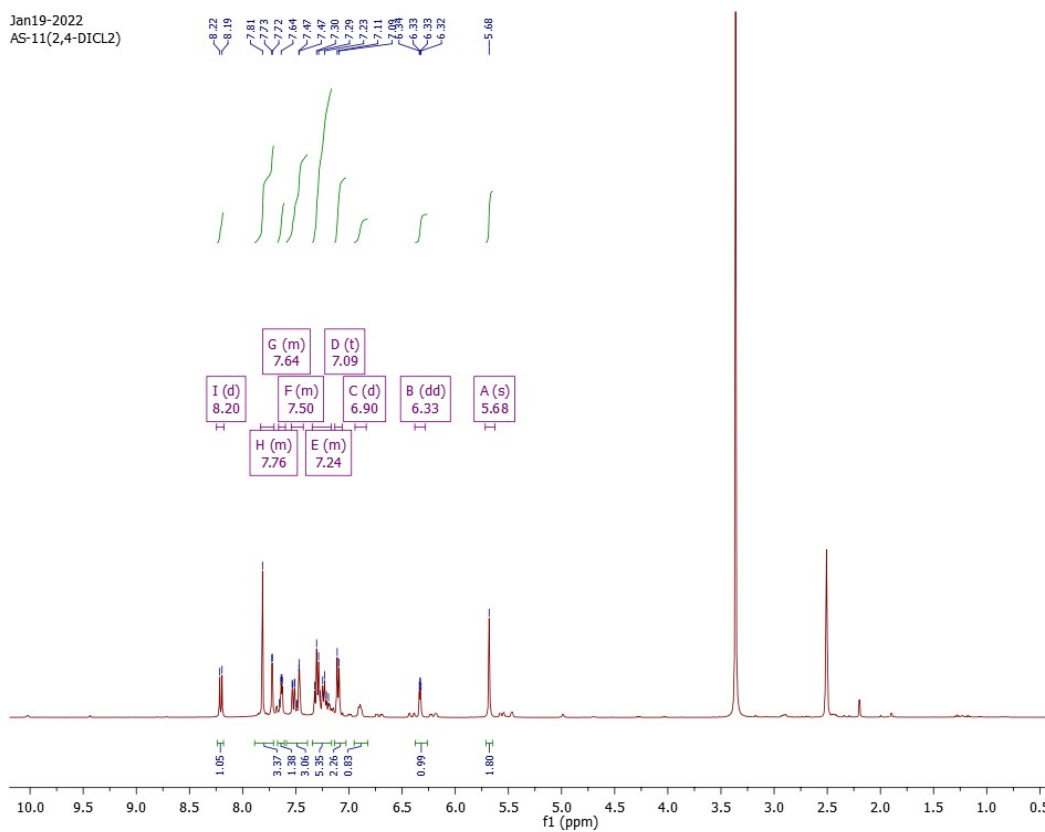

# <sup>13</sup>C NMR spectrum of compound **1d** in DMSO-d<sub>6</sub>

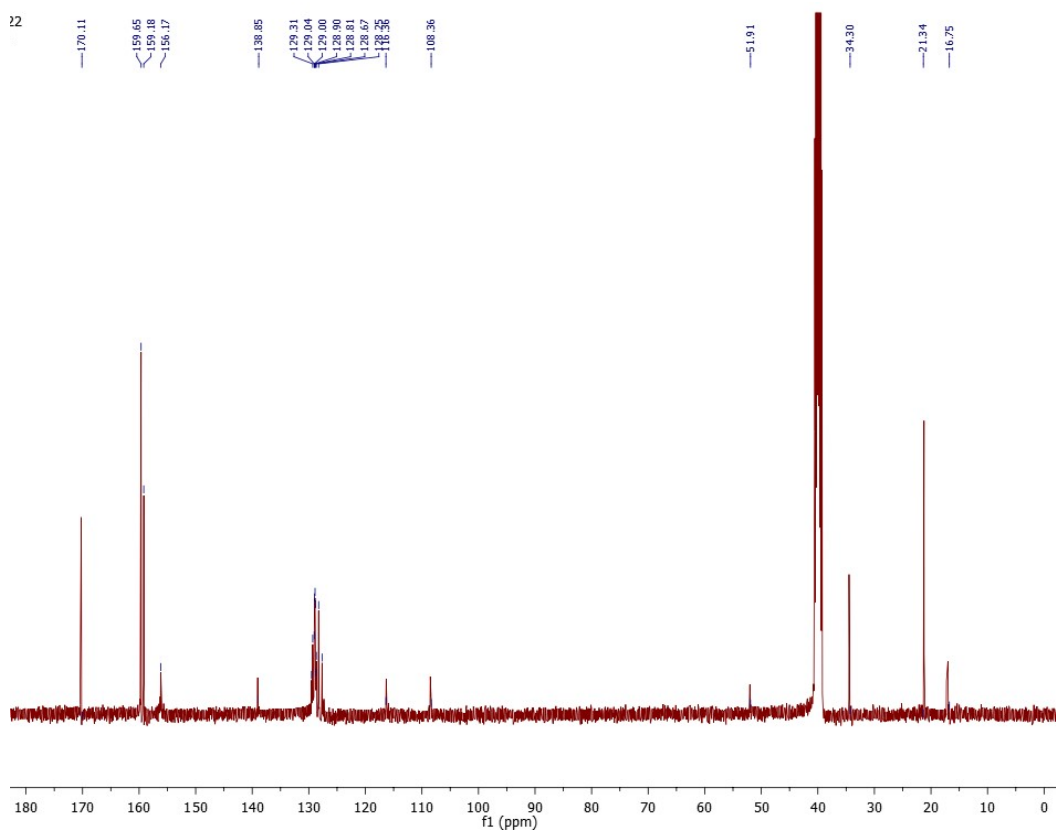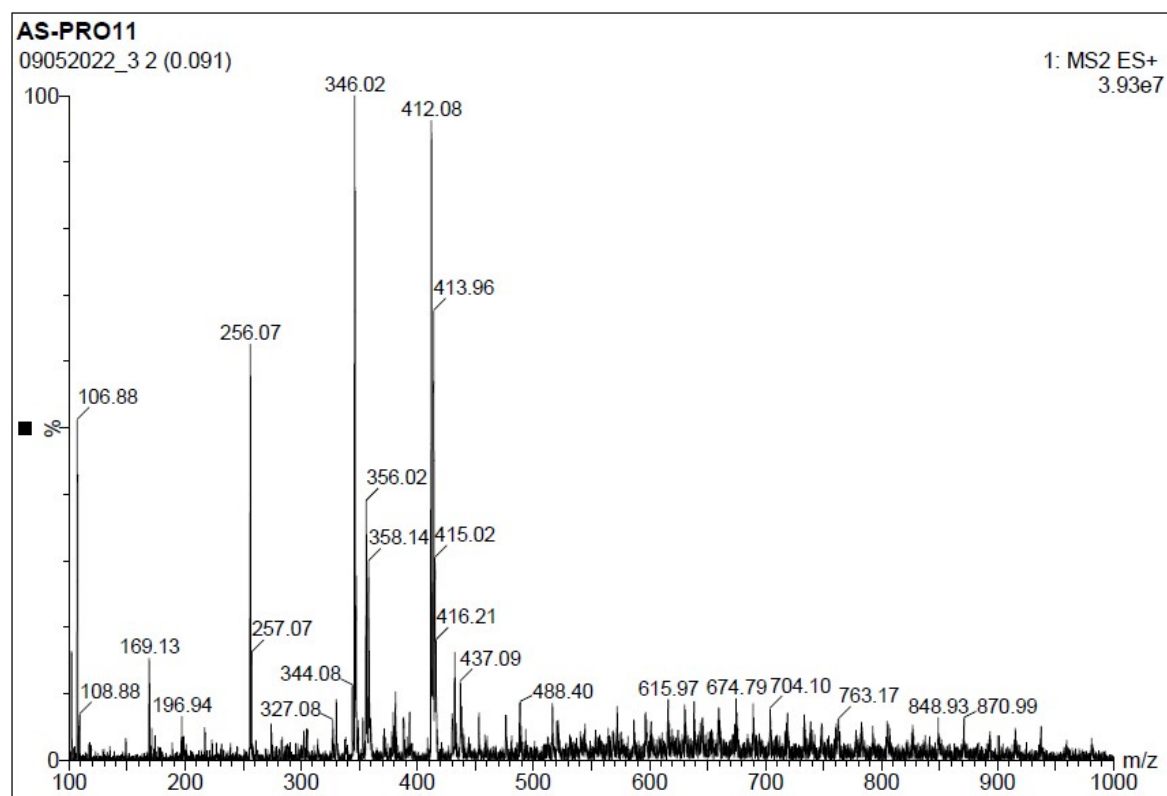

LCMS/MS spectrum of compound **1d**.

$^1\text{H}$  NMR spectrum of compound **1e** in  $\text{DMSO-d}_6$ .

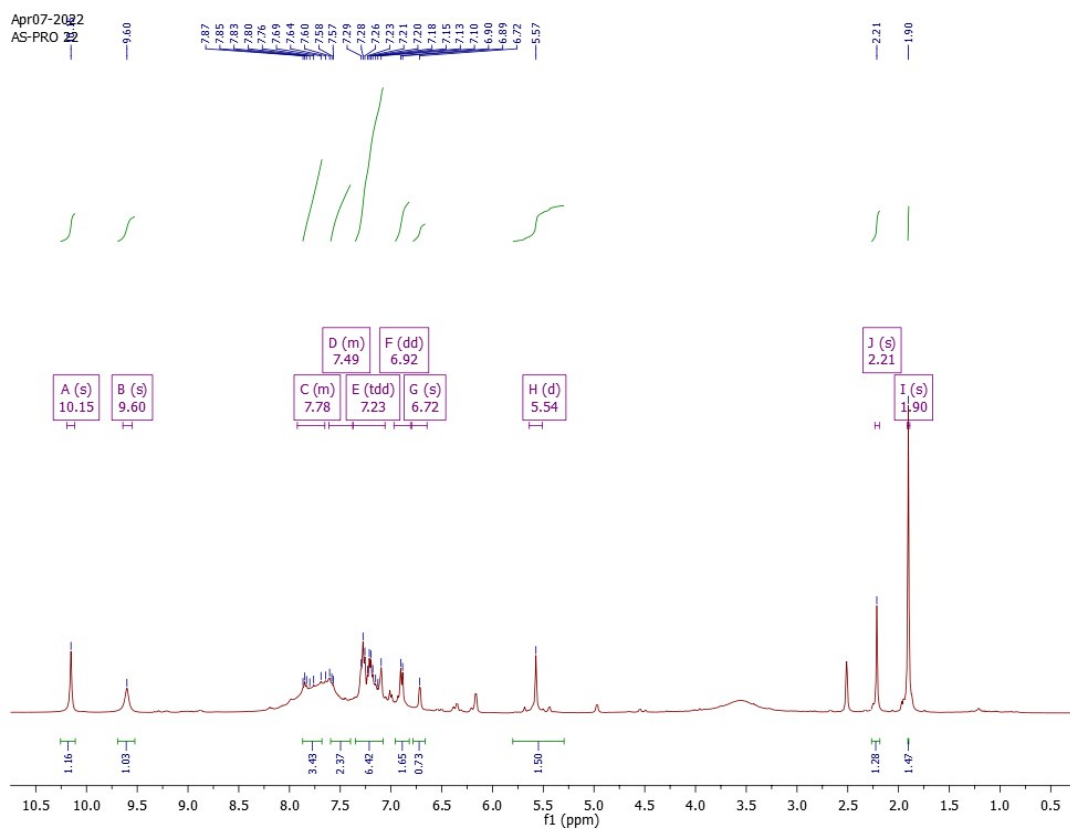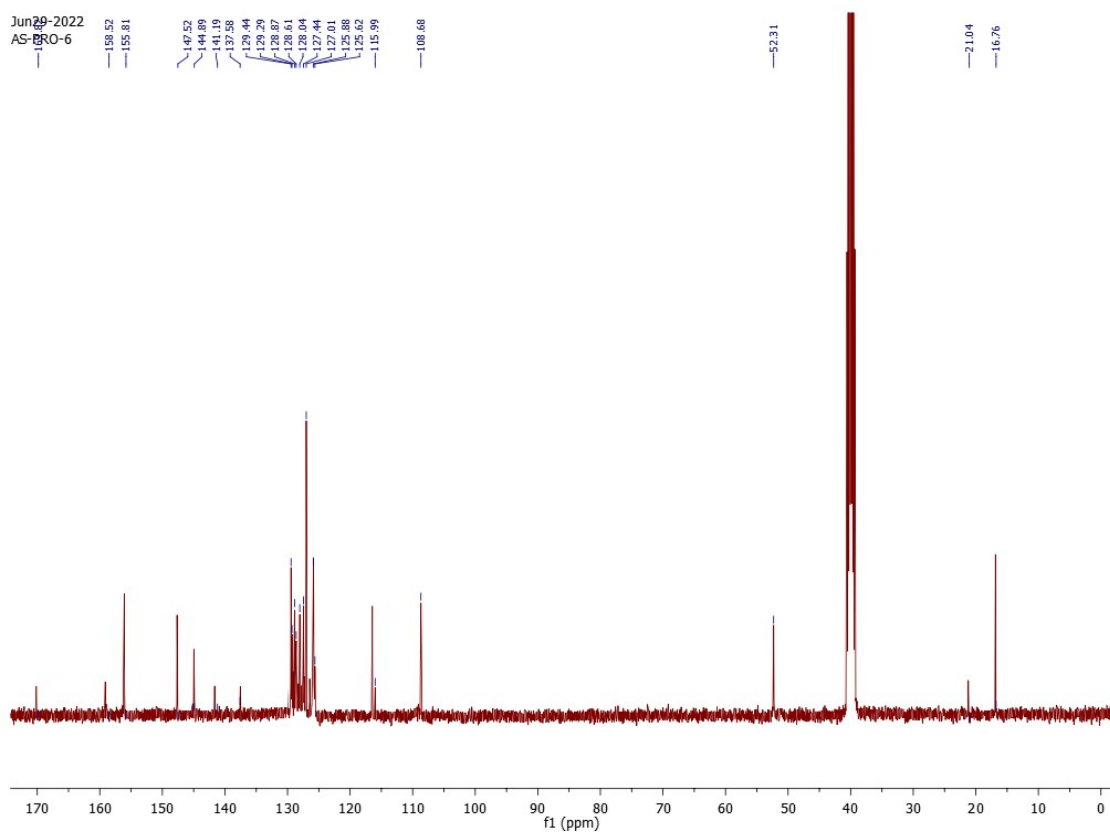

$^{13}\text{C}$   
N  
MR  
spe  
ctru  
m  
of  
co  
mp  
oun  
d  
**1e**  
in  
D  
MS  
O-  
 $\text{d}_6$



HRMS spectrum of compound **1e**.

MS Zoomed Spectrum

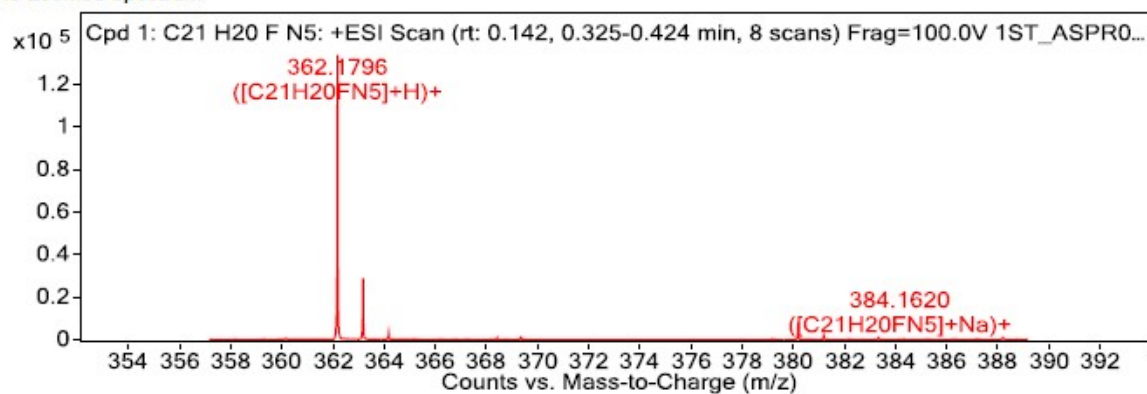

<sup>1</sup>H NMR spectrum of compound **1f** in DMSO-d<sub>6</sub>.

Apr07-2022  
AS-PRO-24

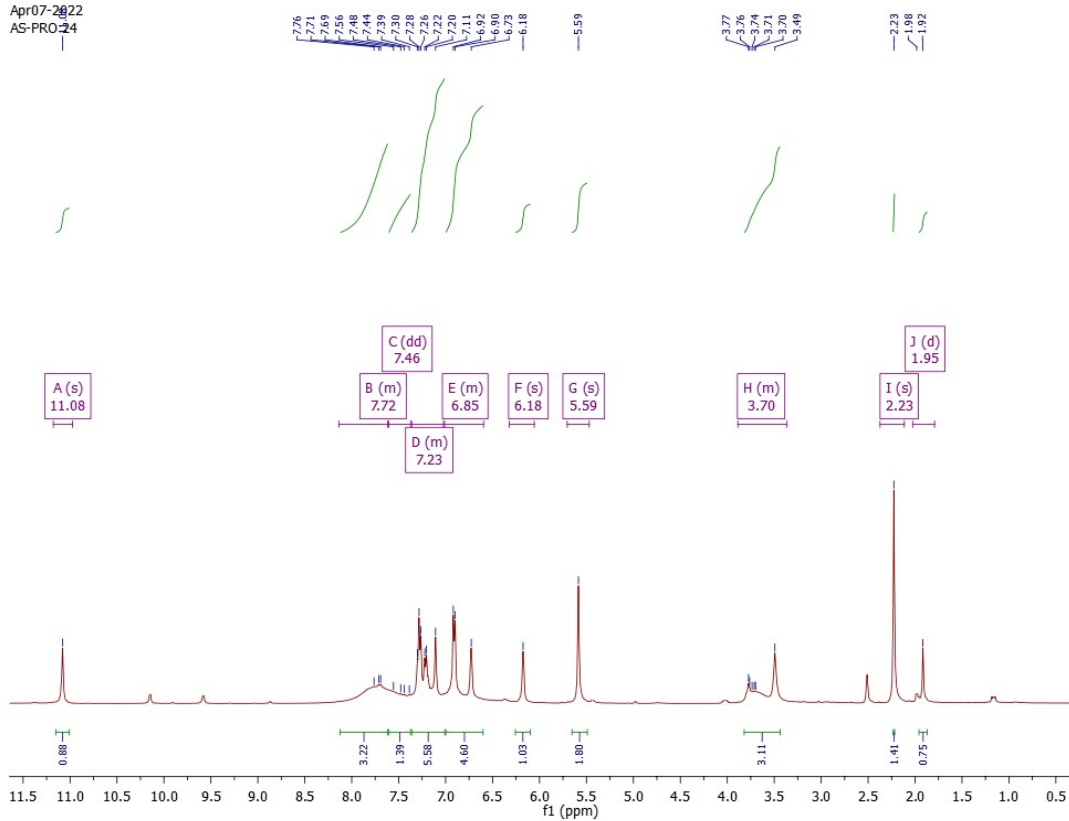

$^{13}\text{C}$  NMR spectrum of compound **1f** in  $\text{DMSO-d}_6$

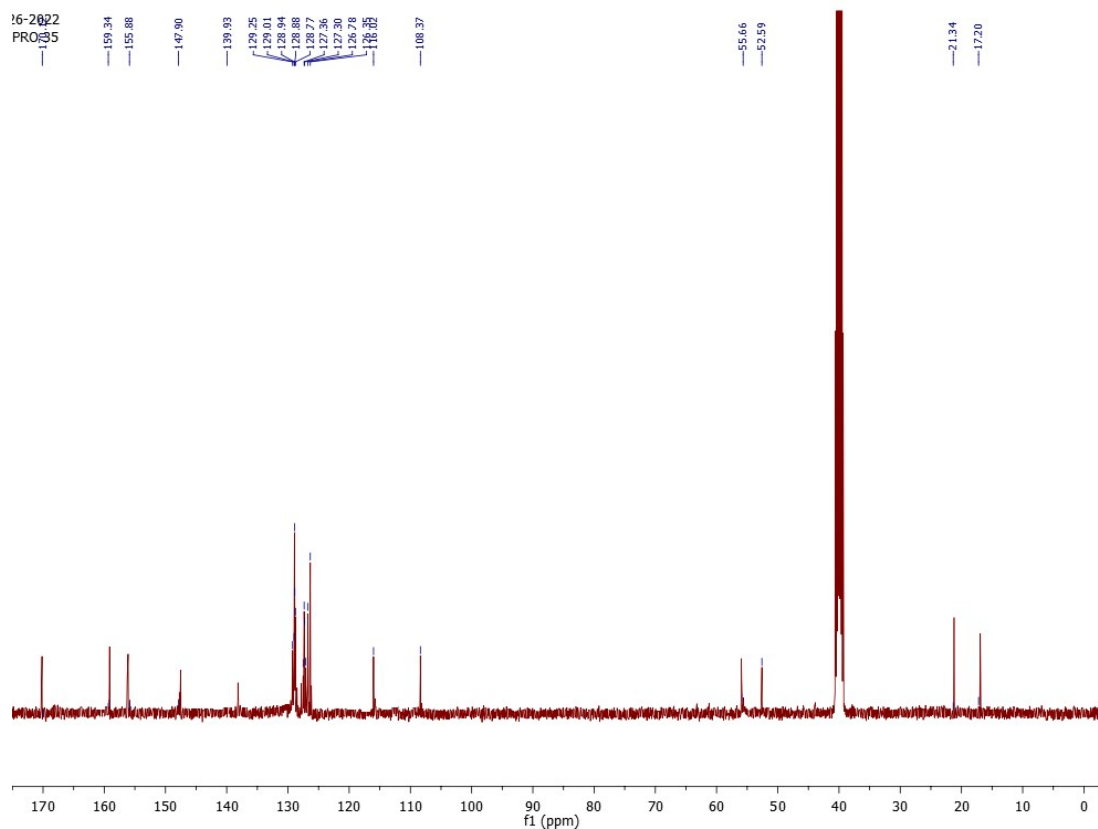

HRMS spectrum of compound **1f**.

MS Zoomed Spectrum

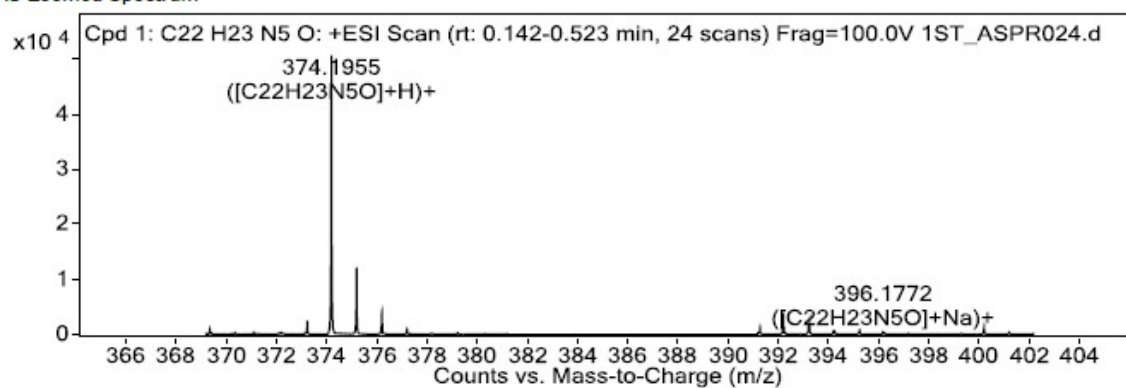

<sup>1</sup>H NMR spectrum of compound **1g** in DMSO-d<sub>6</sub>.

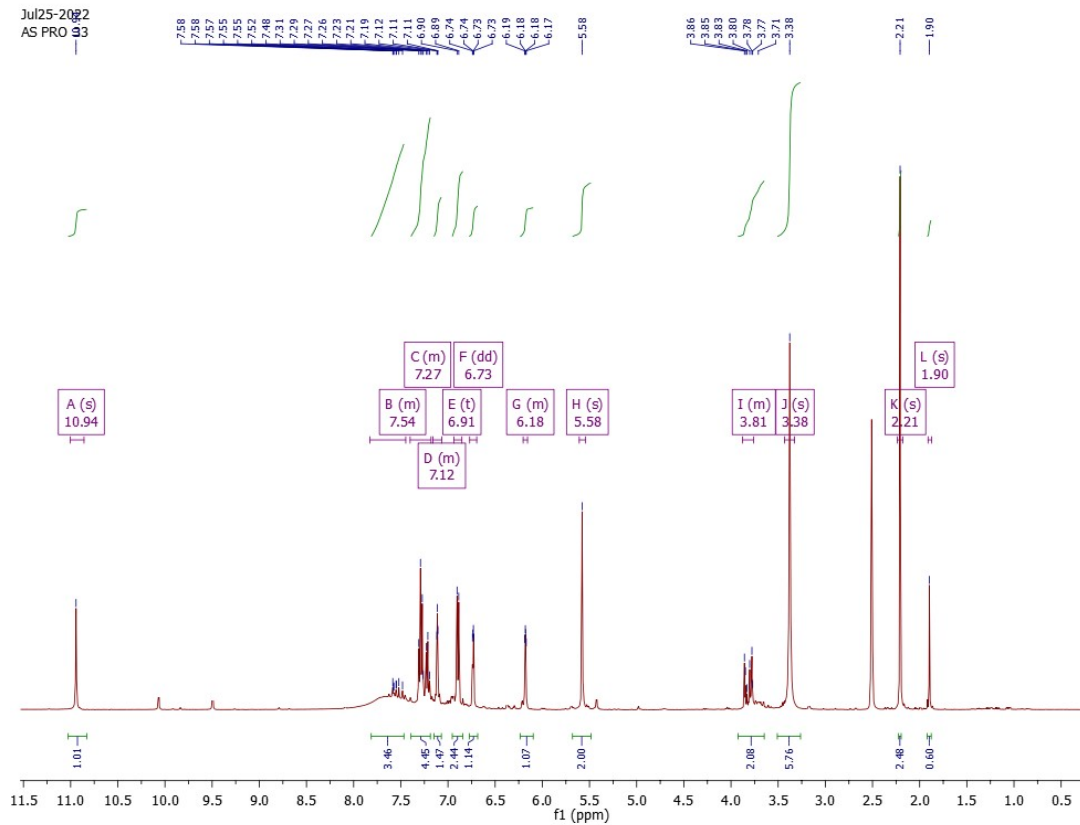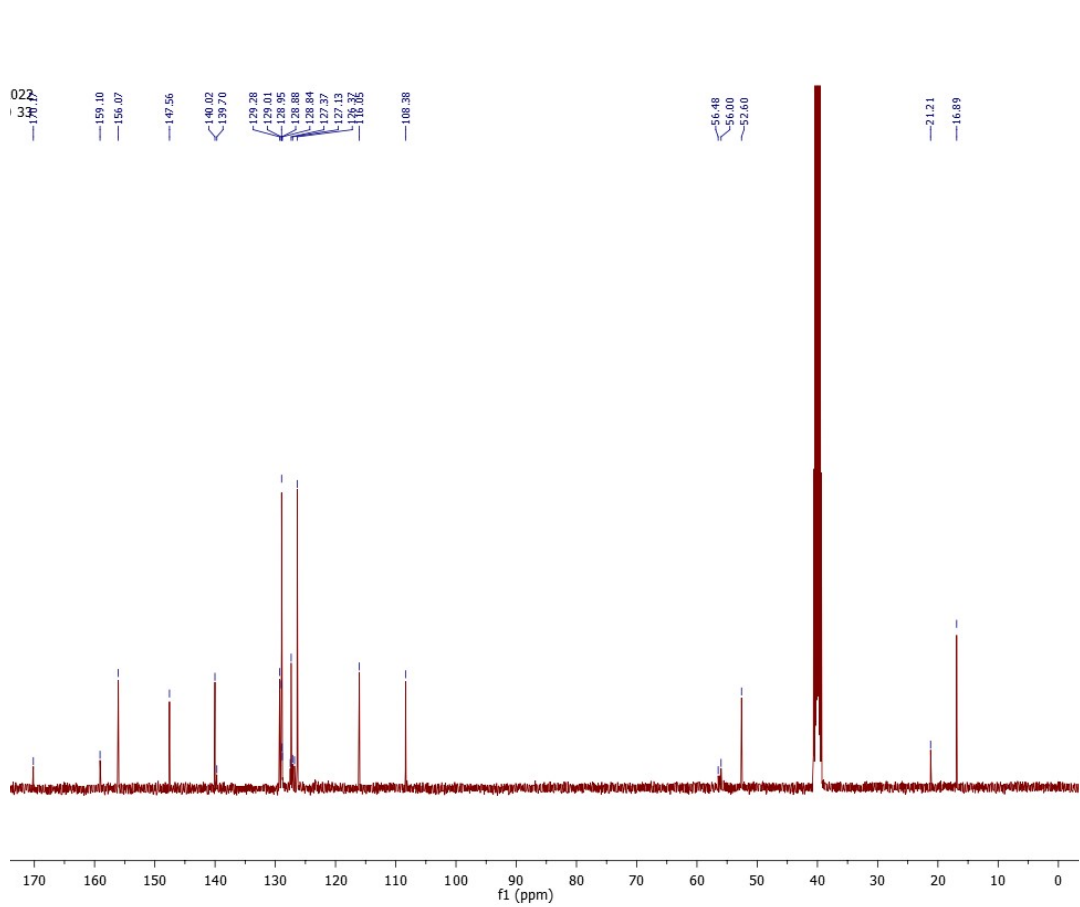

$^{13}\text{C}$   
NMR  
spectrum  
of  
compound **1g**  
in  
DMSO  
- $\text{d}_6$ .

MS Zoomed Spectrum

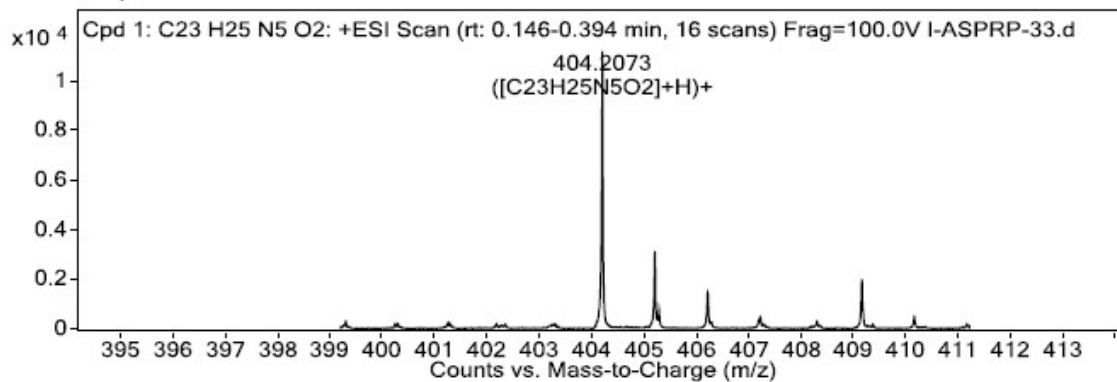

HRMS spectrum of compound **1g**.

$^1\text{H}$  NMR spectrum of compound **1h** in  $\text{DMSO-d}_6$ .

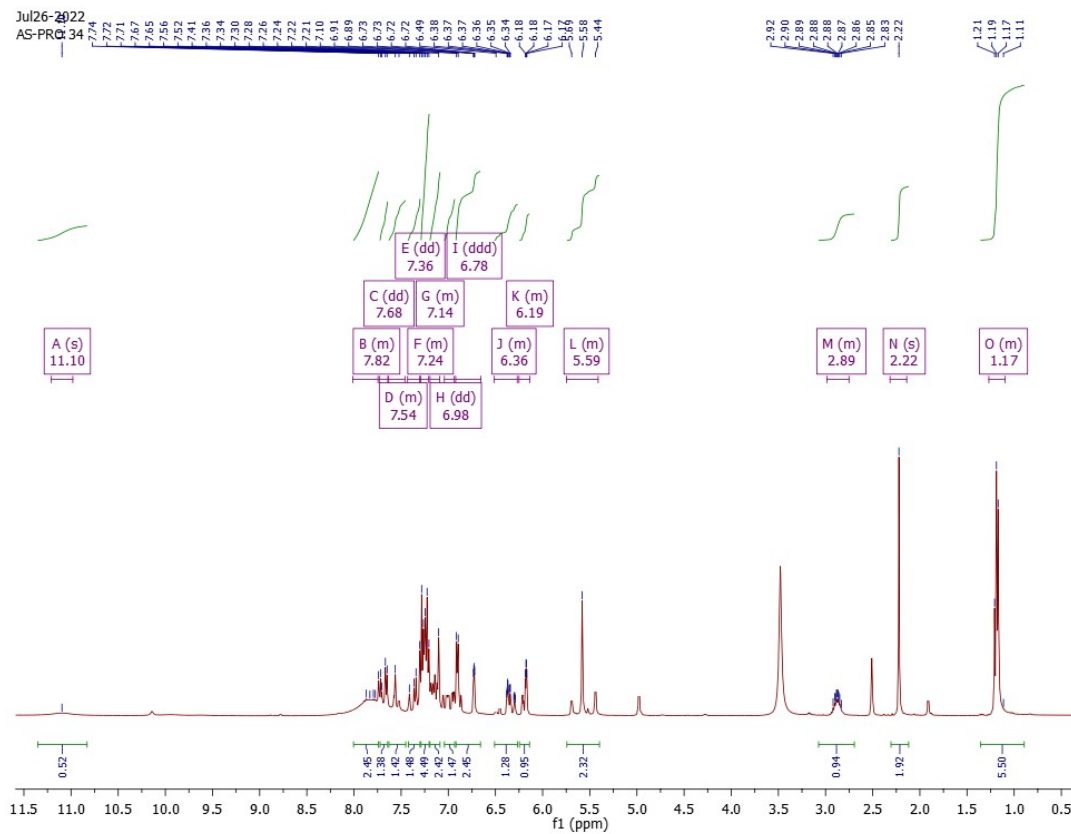

$^{13}\text{C}$  NMR spectrum of compound **1h** in DMSO- $d_6$ .

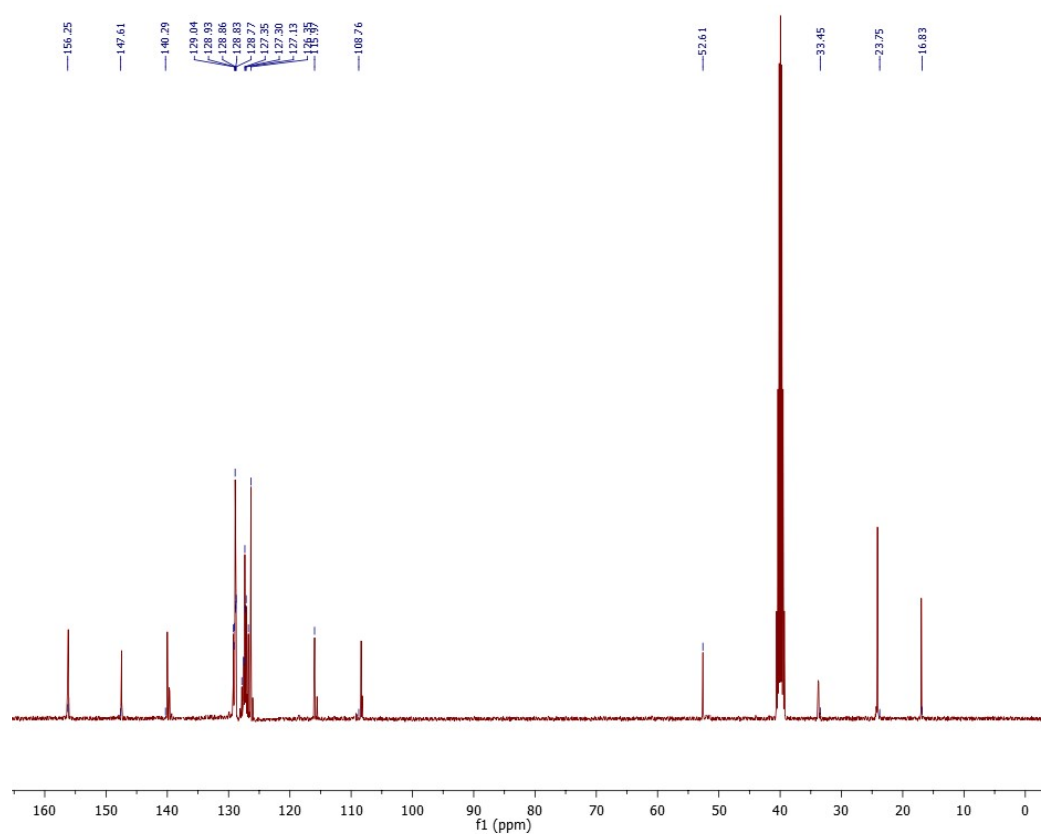

MS Zoomed Spectrum

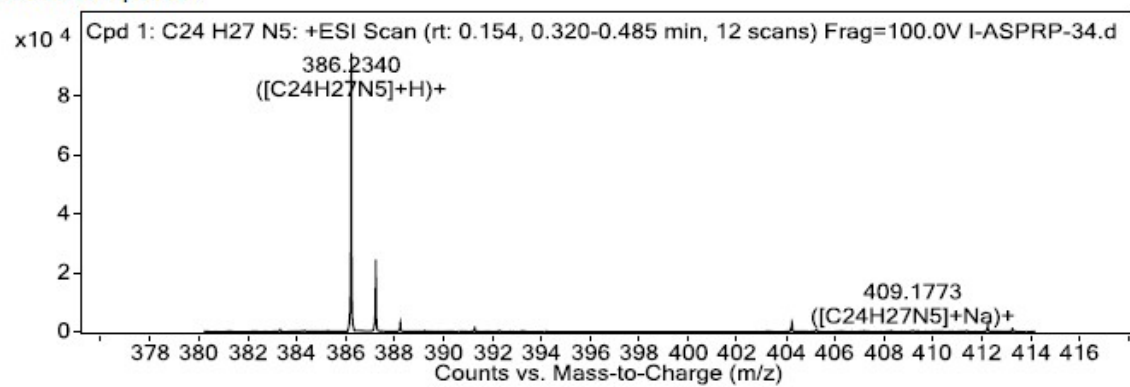

HRMS spectrum of compound **1h**.

<sup>1</sup>H NMR spectrum of compound **1i** in DMSO-d<sub>6</sub>.

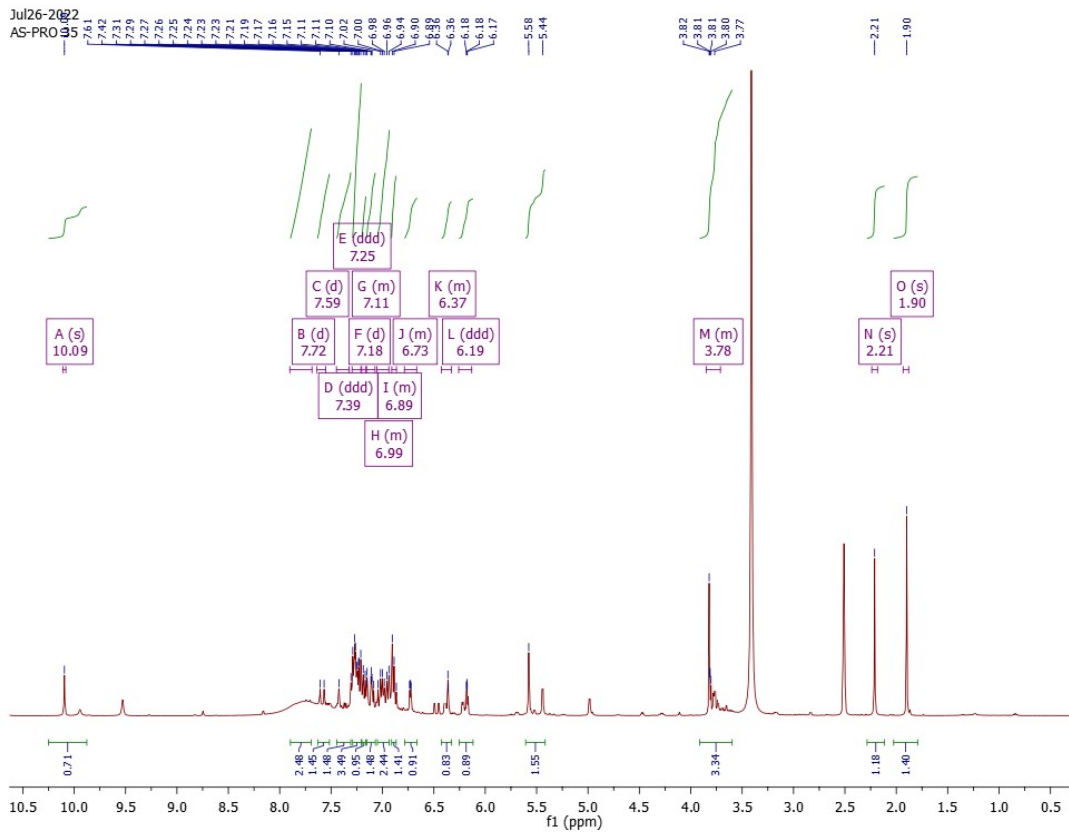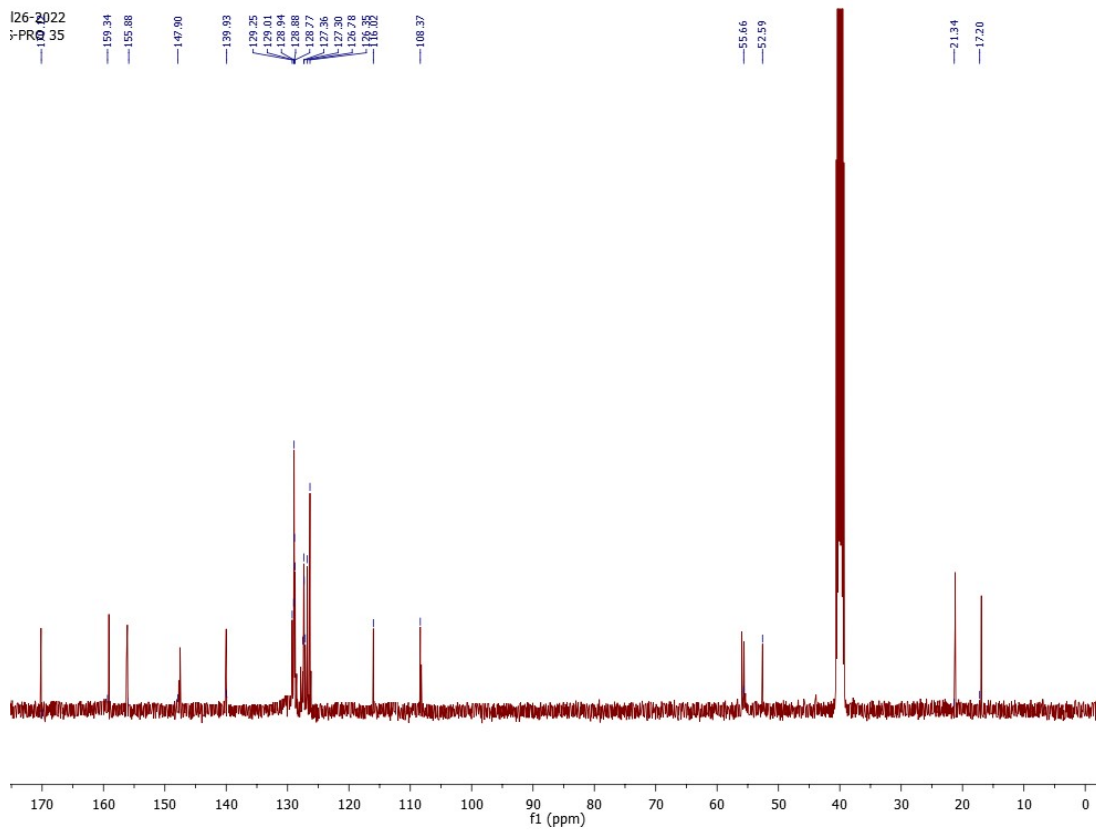

<sup>13</sup>C  
NMR  
spect  
rum  
of  
comp  
ound  
**1i**  
in  
DMS  
O-d<sub>6</sub>.



# HRMS spectrum of compound **1i**.

## MS Zoomed Spectrum

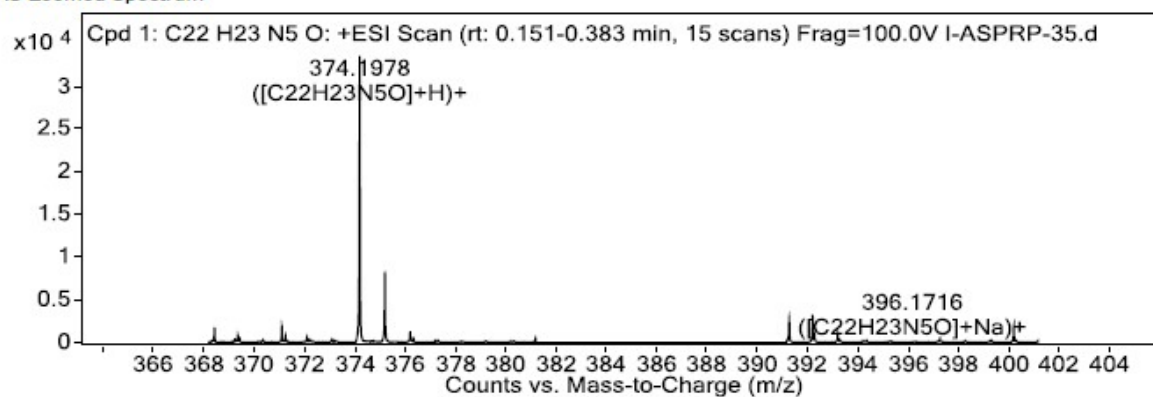

# <sup>1</sup>H NMR spectrum of compound **1j** in DMSO-d<sub>6</sub>.

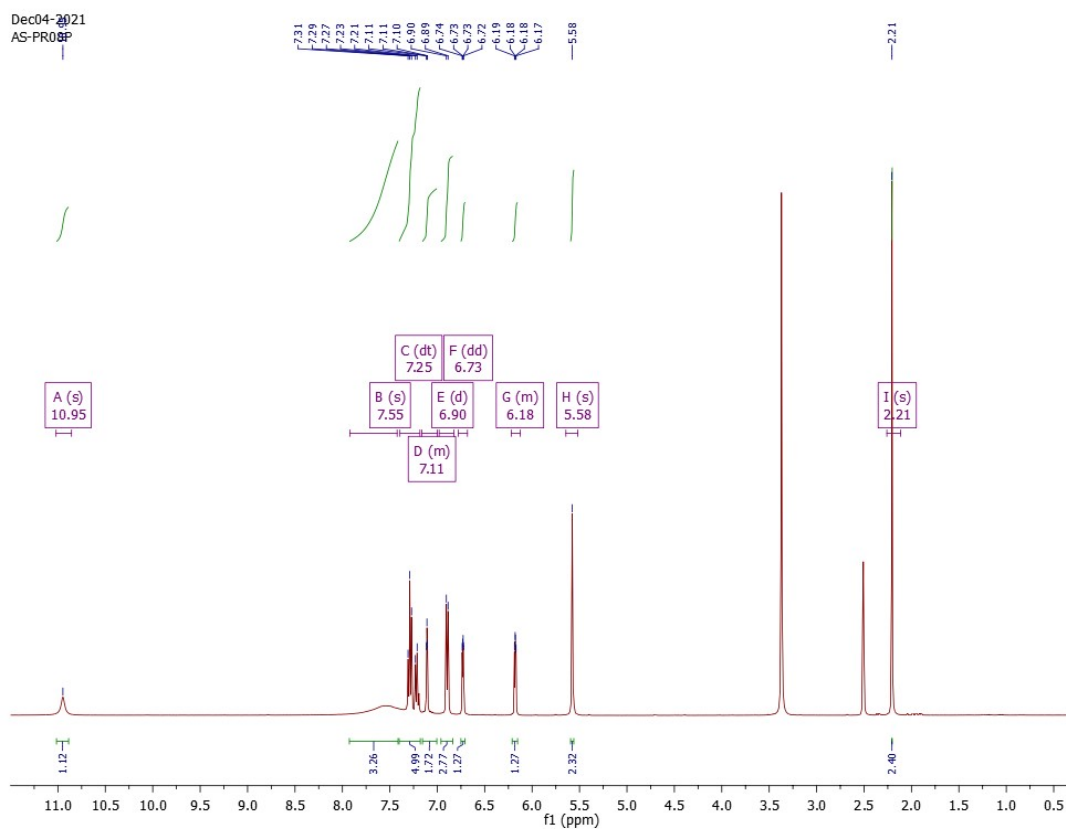

<sup>13</sup>C NMR spectrum of compound **1j** in DMSO-d<sub>6</sub>

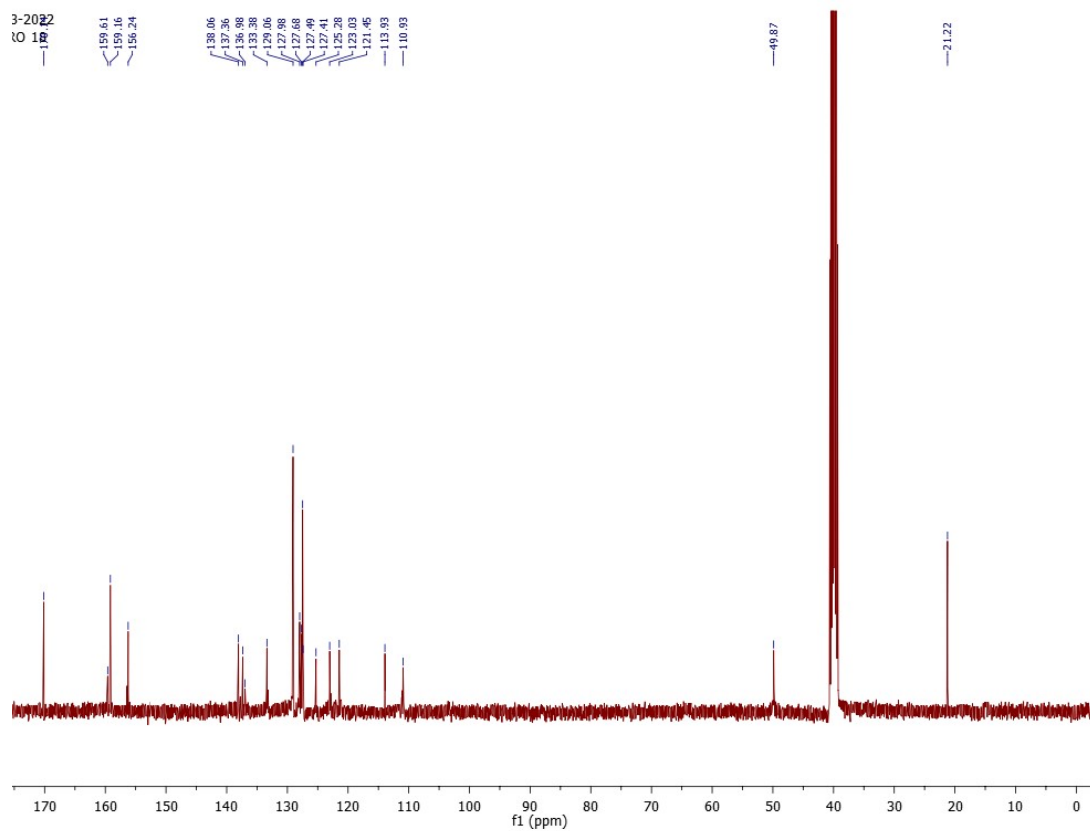

HRMS spectrum of compound **1j**.

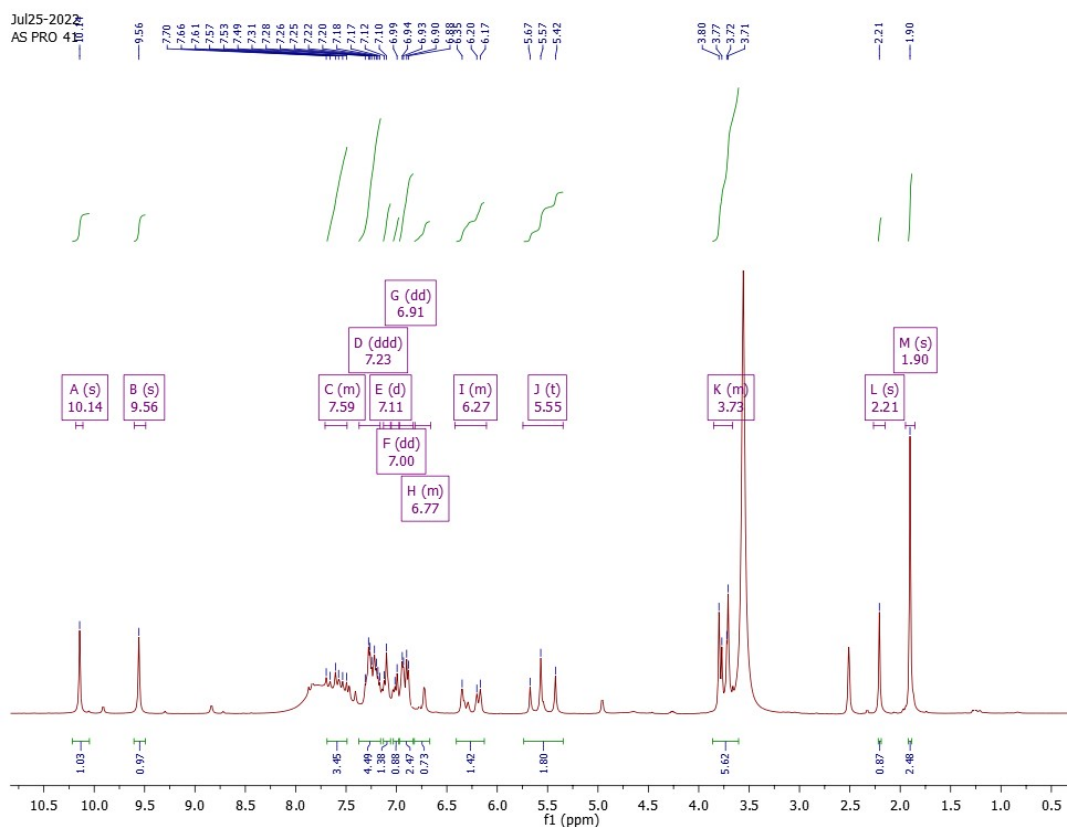

<sup>1</sup>H  
NMR  
spectrum of

compound **2a** in DMSO-d<sub>6</sub>.

<sup>13</sup>C NMR spectrum of compound **2a** in DMSO-d<sub>6</sub>.

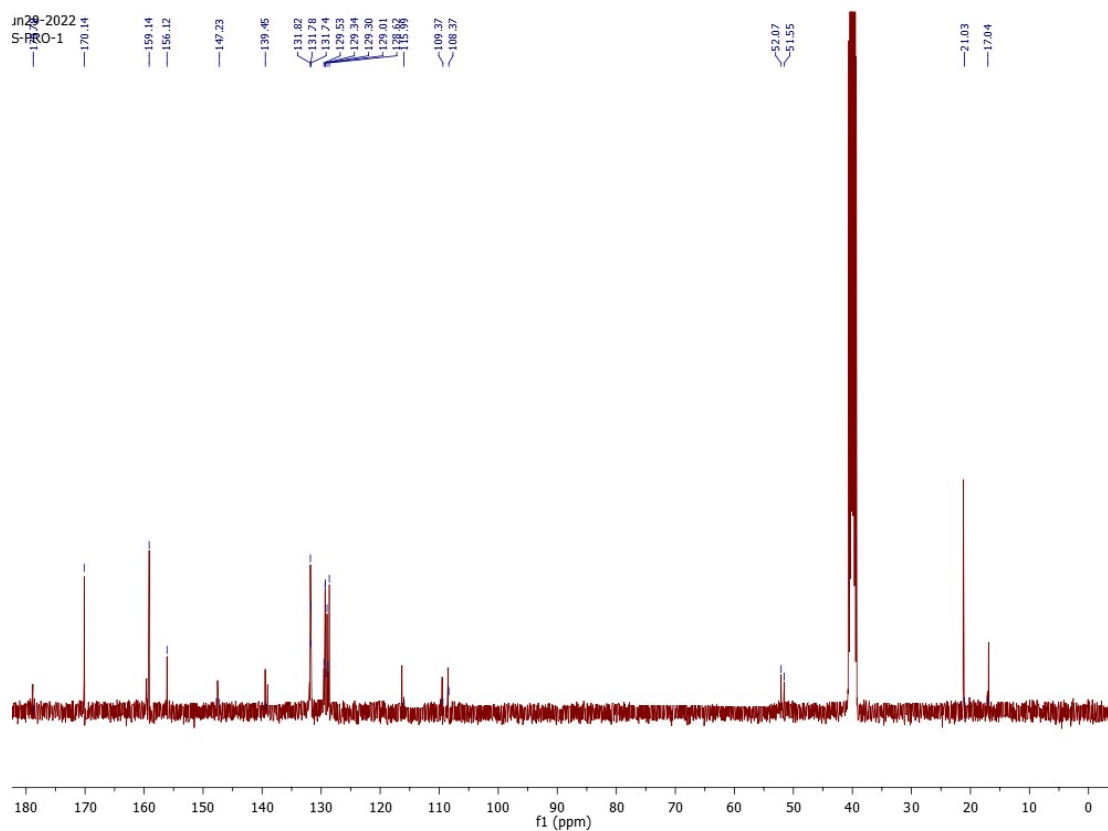

HRM  
S  
spectr  
um of  
comp  
ound  
**2a**.

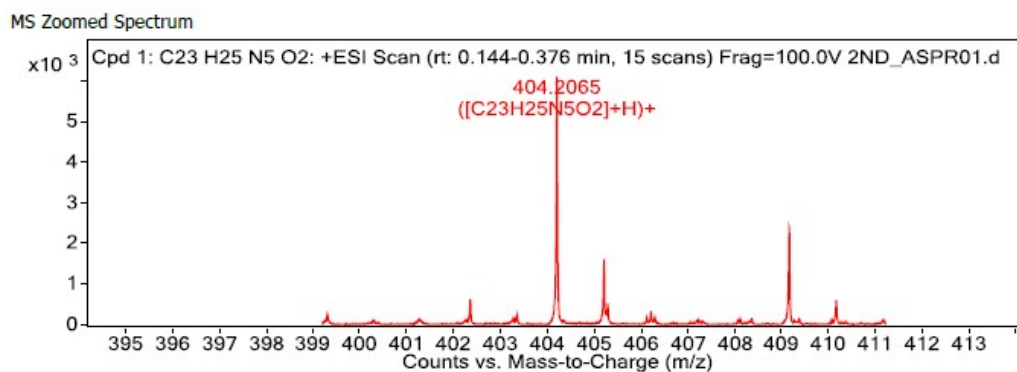

<sup>1</sup>H NMR spectrum of compound **2b** in DMSO-d<sub>6</sub>.

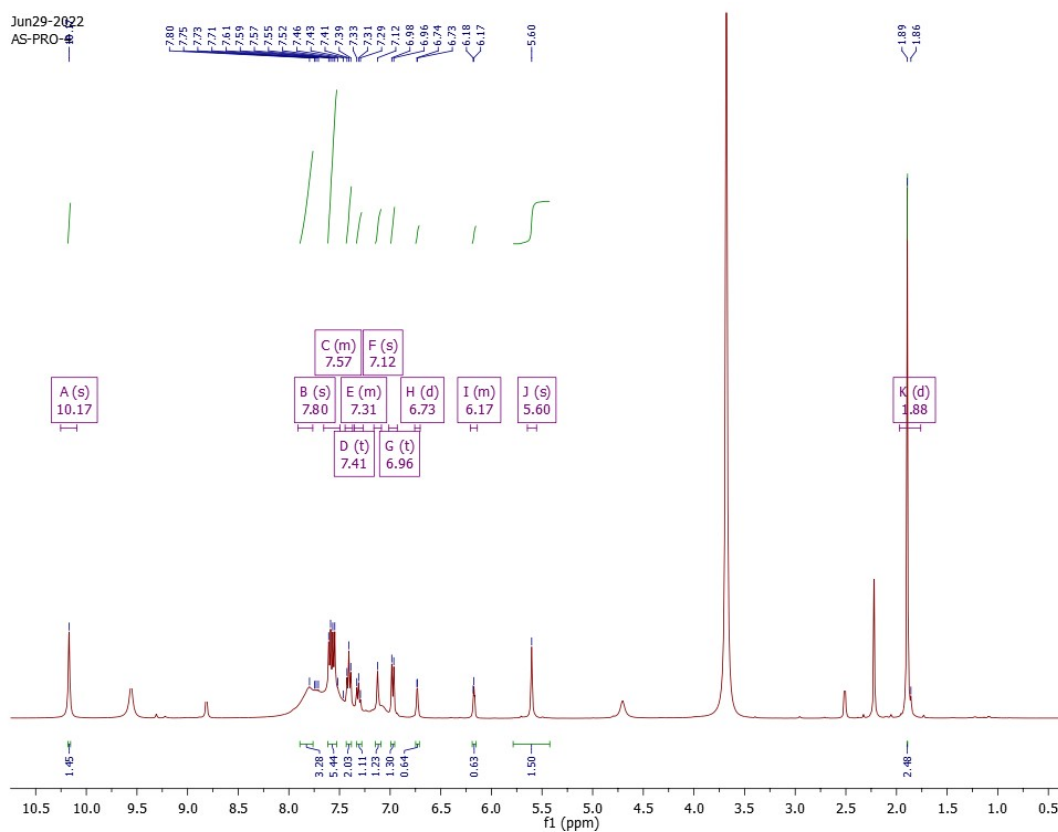

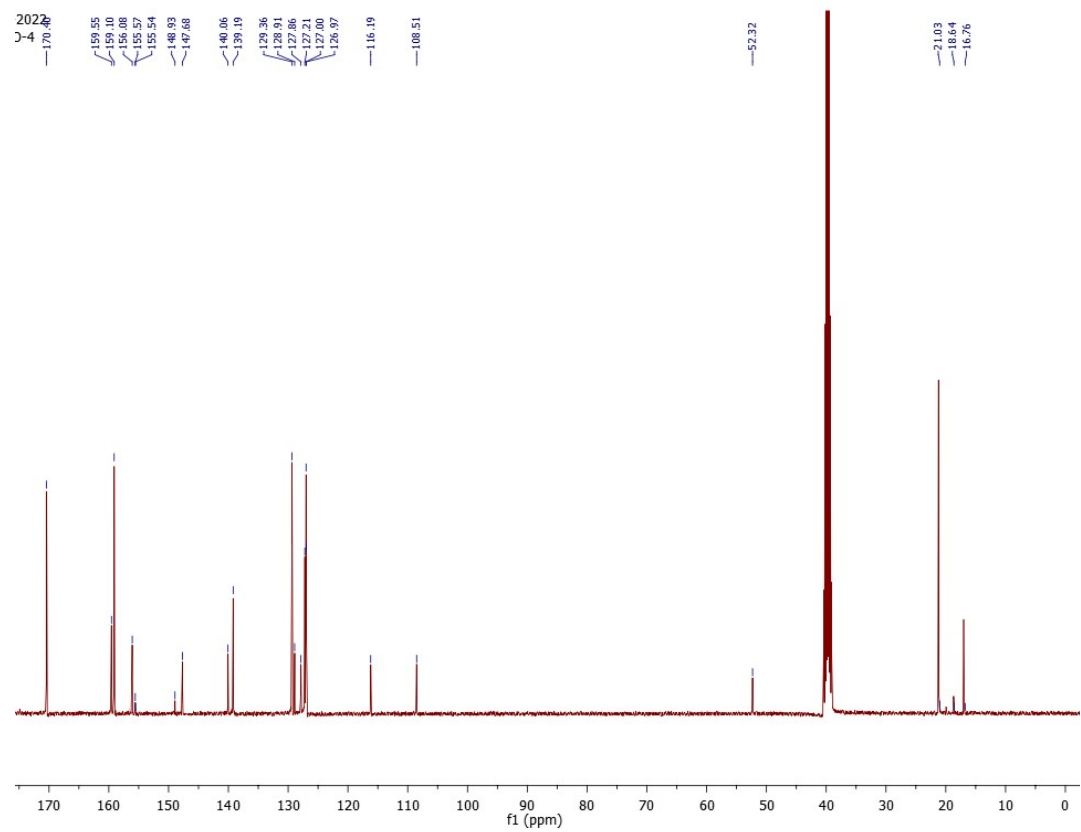

13C  
NMR  
spectrum  
of  
compound  
**2b**  
in  
DM  
SO-  
d<sub>6</sub>.

HRMS spectrum of compound **2b**.

MS Zoomed Spectrum

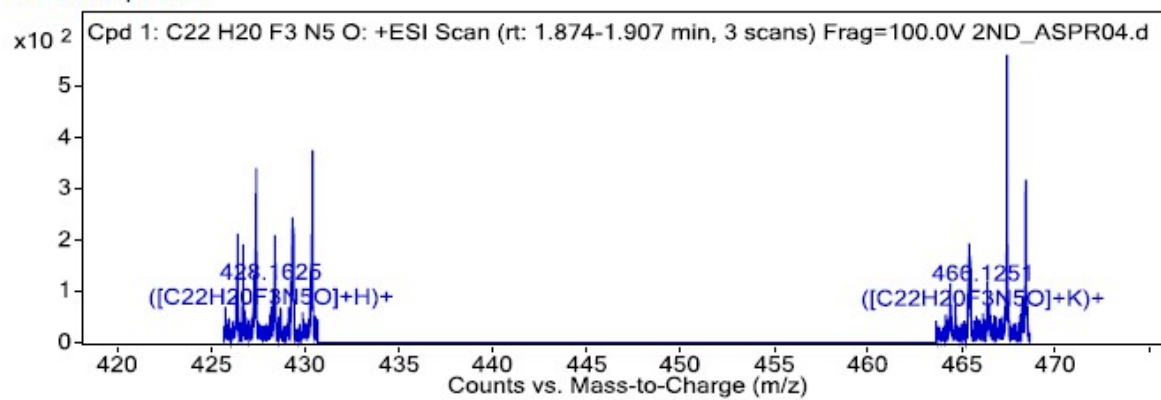

<sup>1</sup>H NMR spectrum of compound **2d** in DMSO-d<sub>6</sub>.

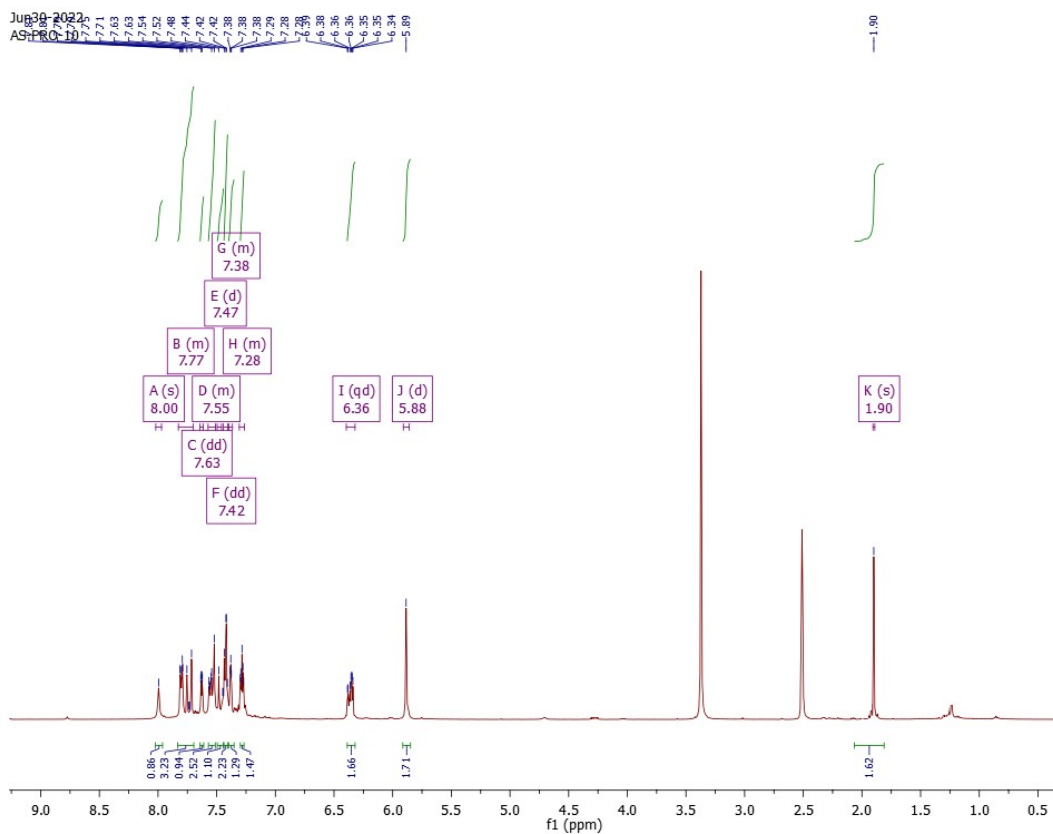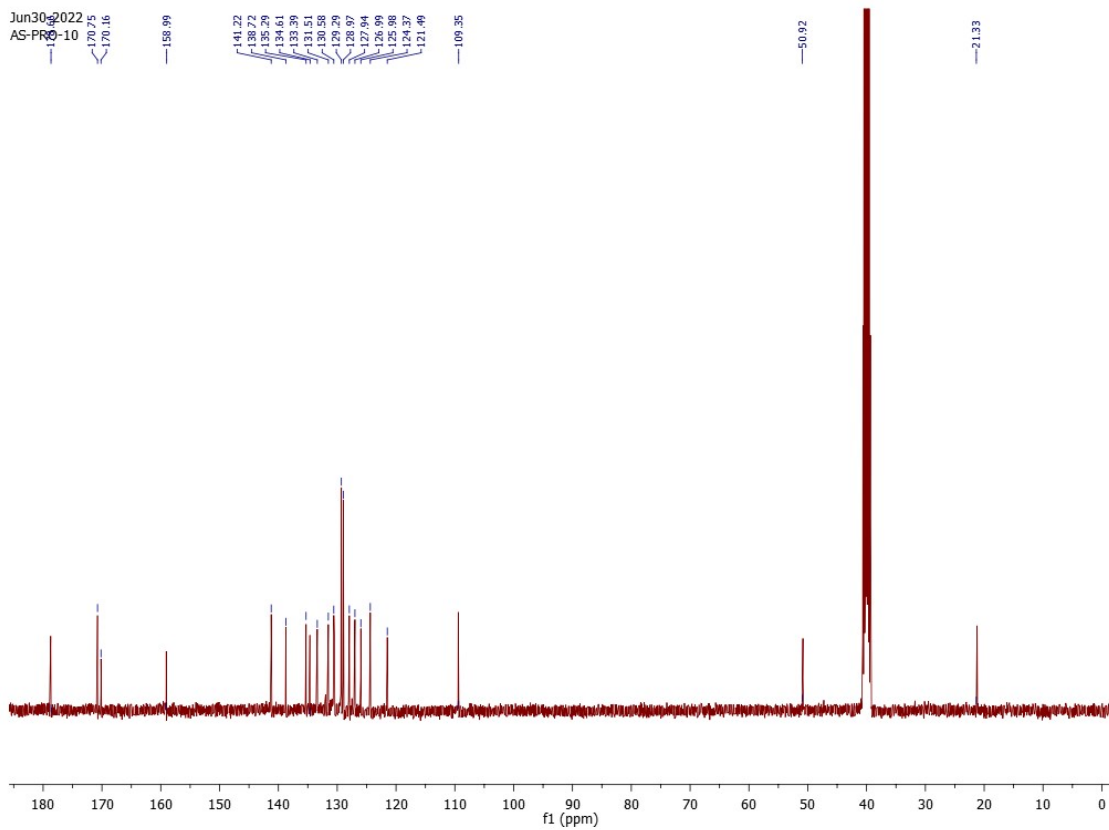

<sup>13</sup>C  
NMR  
spectrum  
of  
compound  
**2d**  
in  
DM  
SO-  
d<sub>6</sub>.

MS Zoomed Spectrum

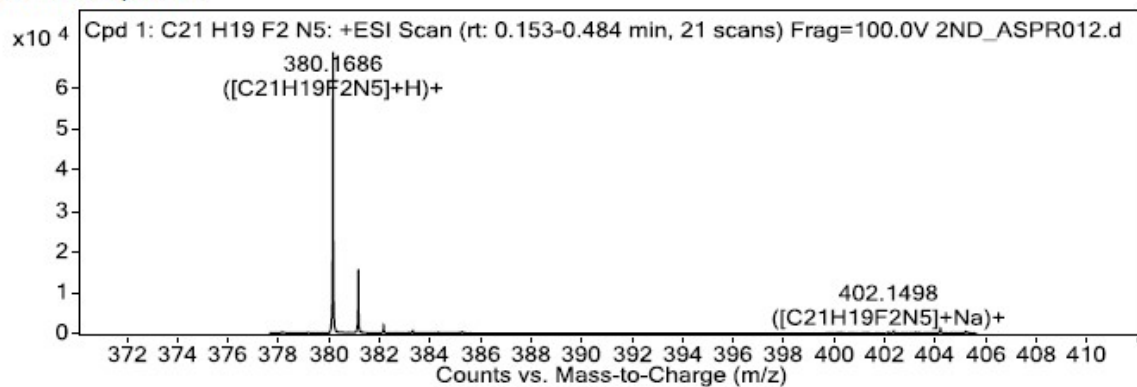

HRMS spectrum of compound **2d**.

<sup>1</sup>H NMR spectrum of compound **2e** in DMSO-d<sub>6</sub>.

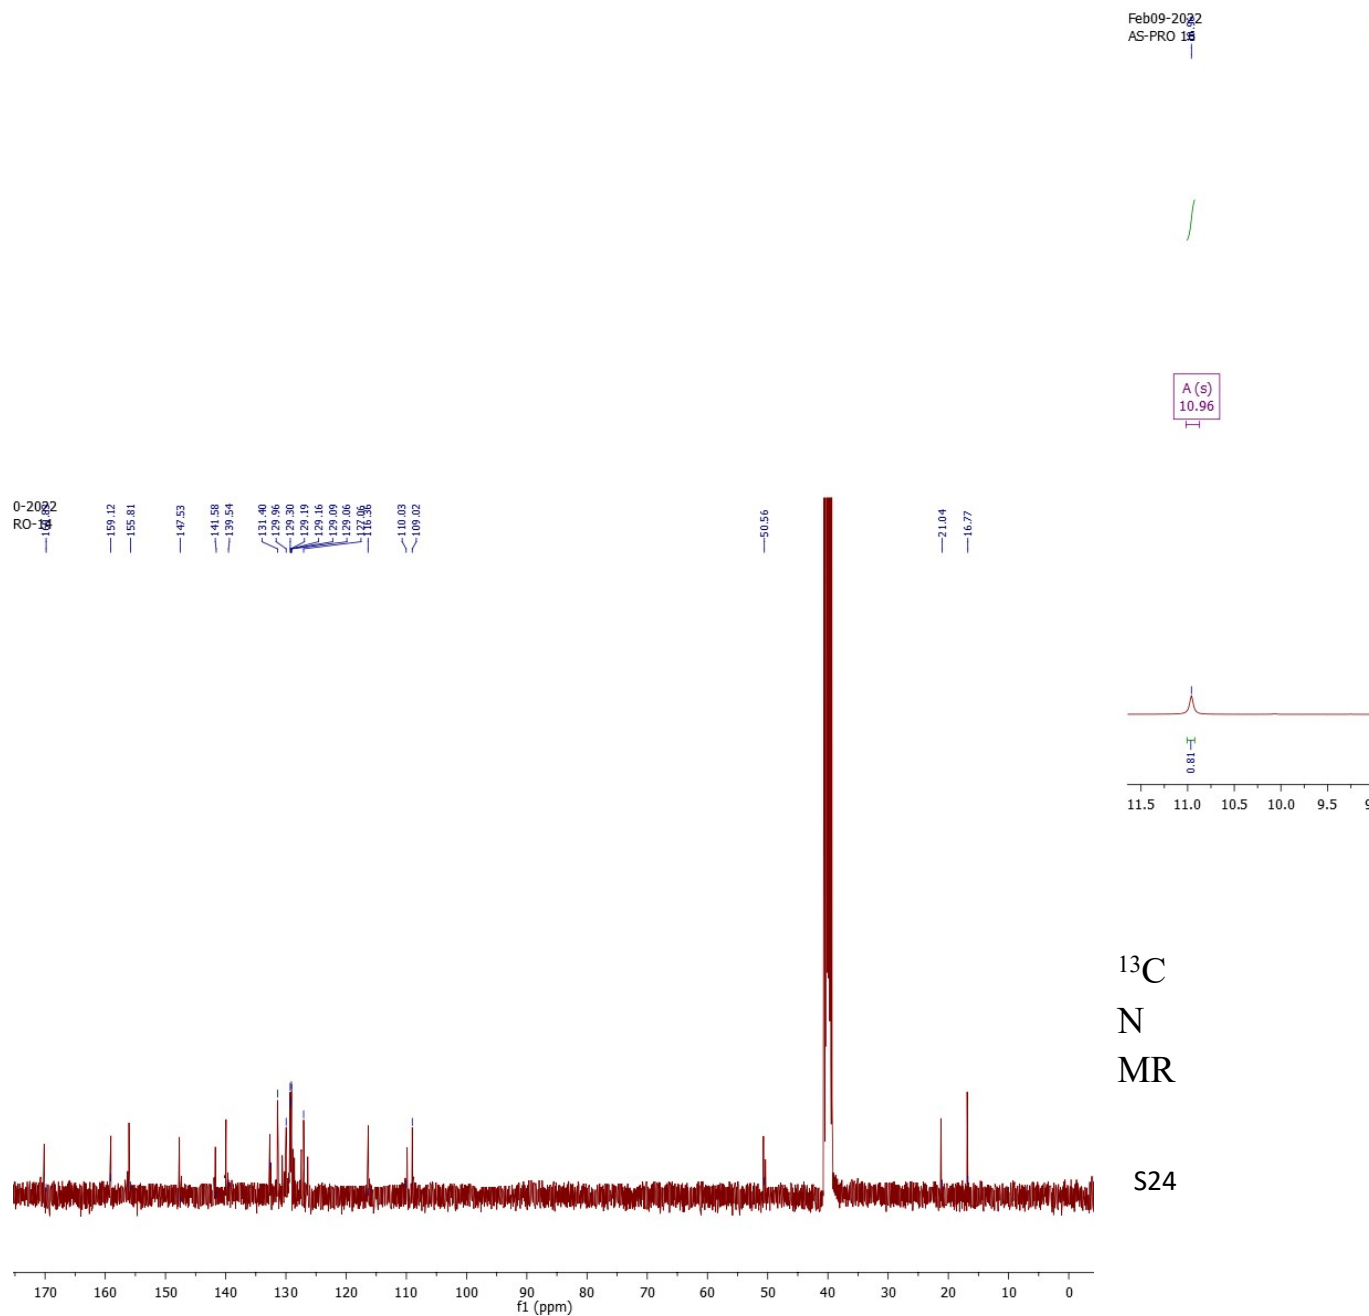



spectrum of compound **2e** in DMSO-d<sub>6</sub>.

HRMS spectrum of compound **2e**.

MS Zoomed Spectrum

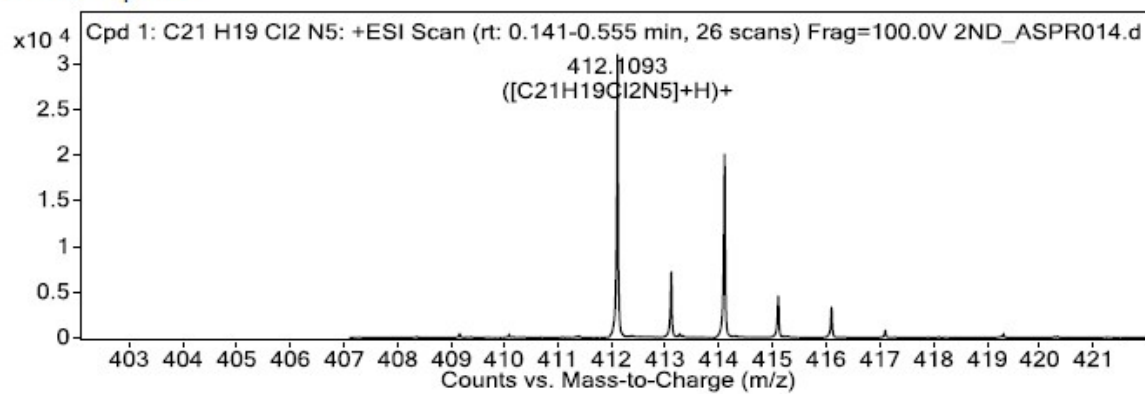

$^1\text{H}$  NMR spectrum of compound **2f** in DMSO- $d_6$ .

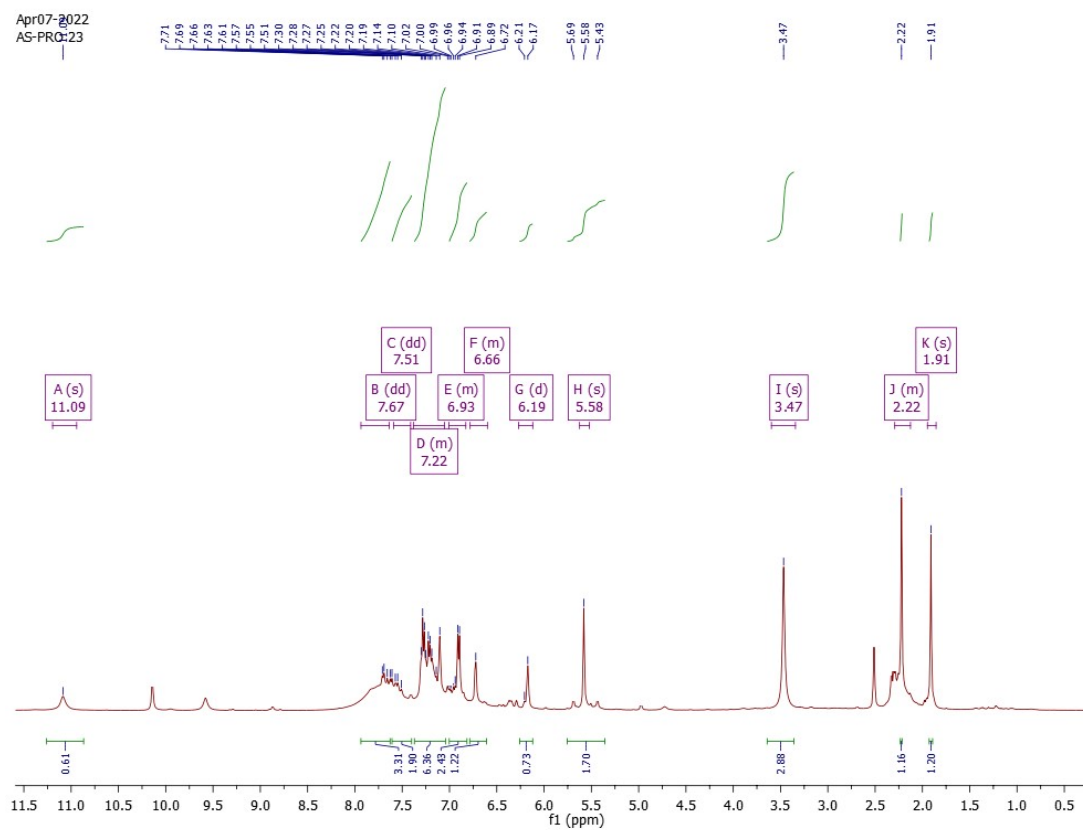

$^{13}\text{C}$

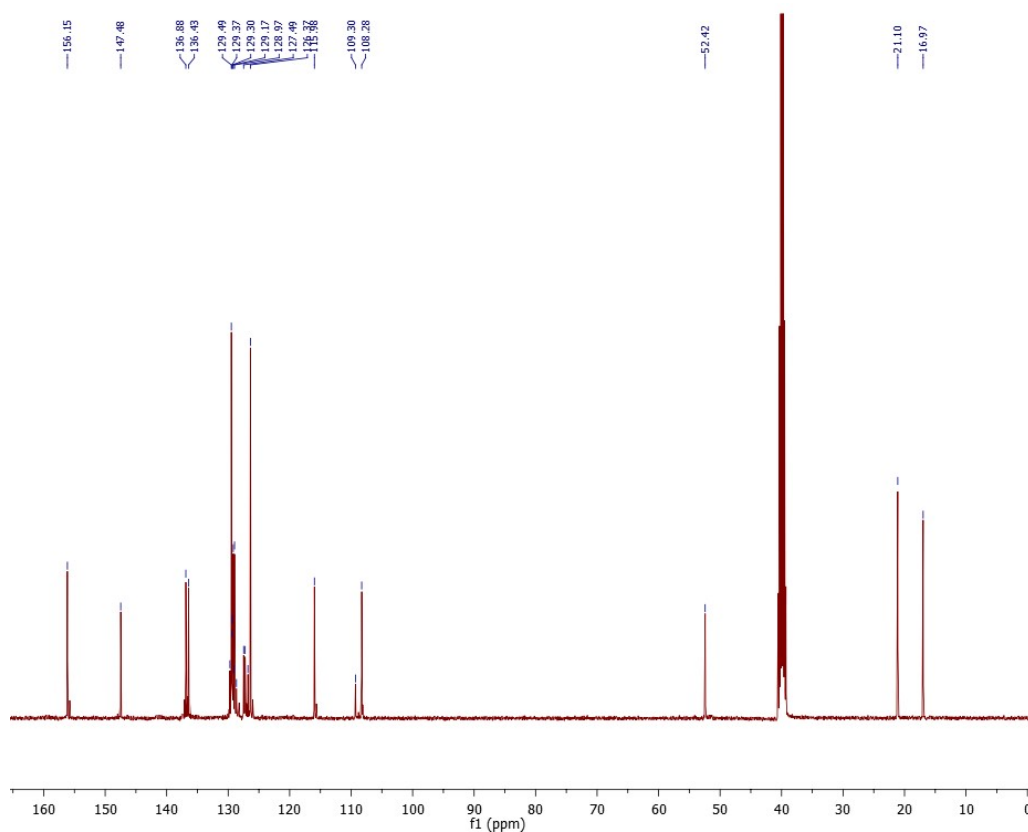

NMR spectrum of compound **2f** in  $\text{DMSO-d}_6$ .

MS Zoomed Spectrum

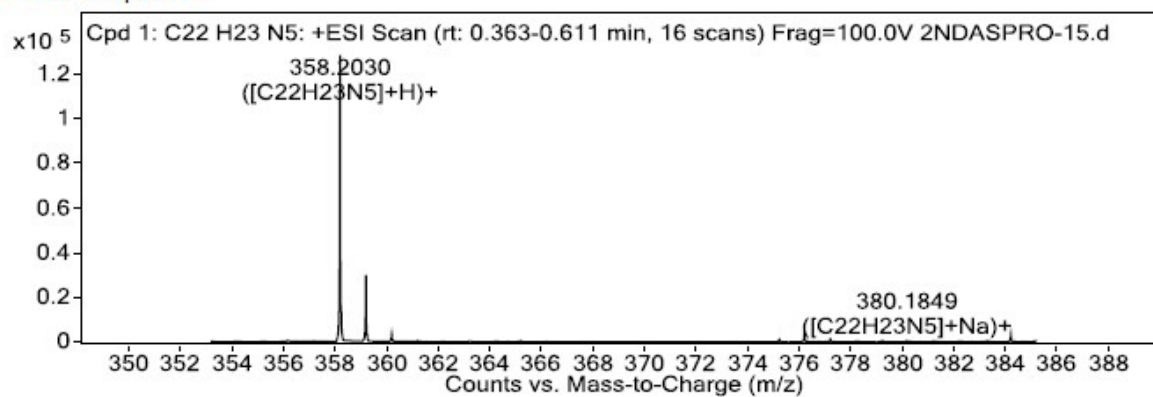

HRMS spectrum of compound **2f**.

$^1\text{H}$  NMR spectrum of compound **2g** in  $\text{DMSO-d}_6$ .

Jul28-2022  
AS-PRO-2

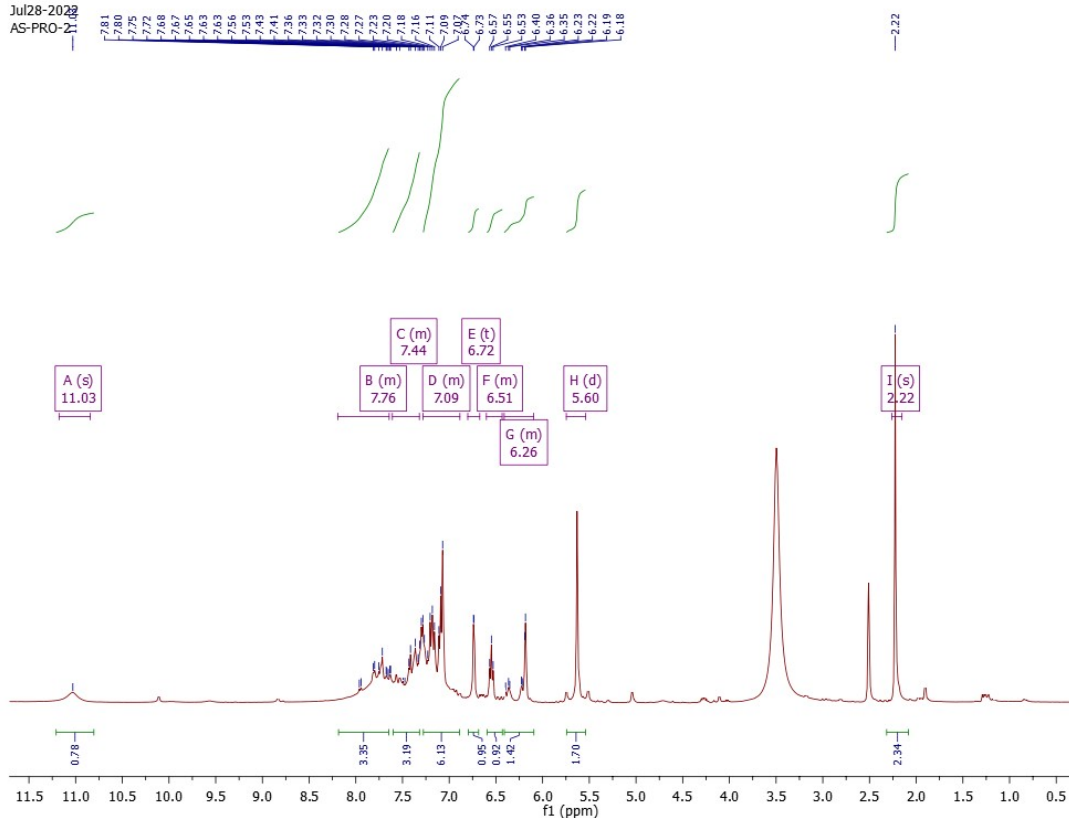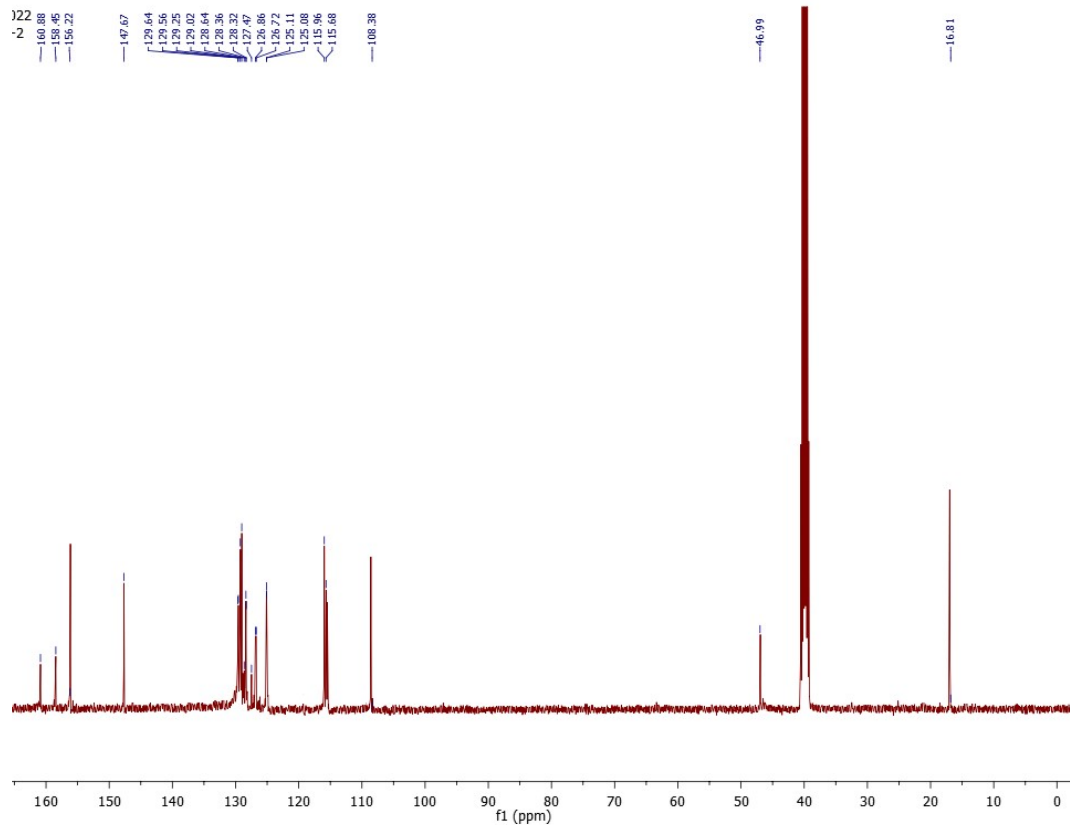

<sup>13</sup>C  
N  
M  
R  
spe  
ctr  
um  
of  
co  
mp  
ou  
nd  
**2g**  
in  
D  
MS  
O-  
d<sub>6</sub>.

HRMS spectrum of compound **2g**.

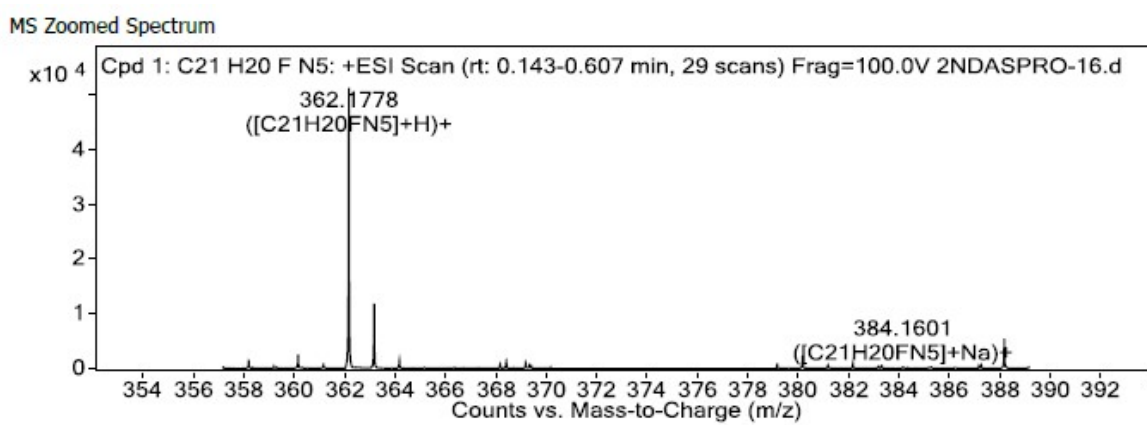

<sup>1</sup>H NMR spectrum of compound **2h** in DMSO-d<sub>6</sub>.

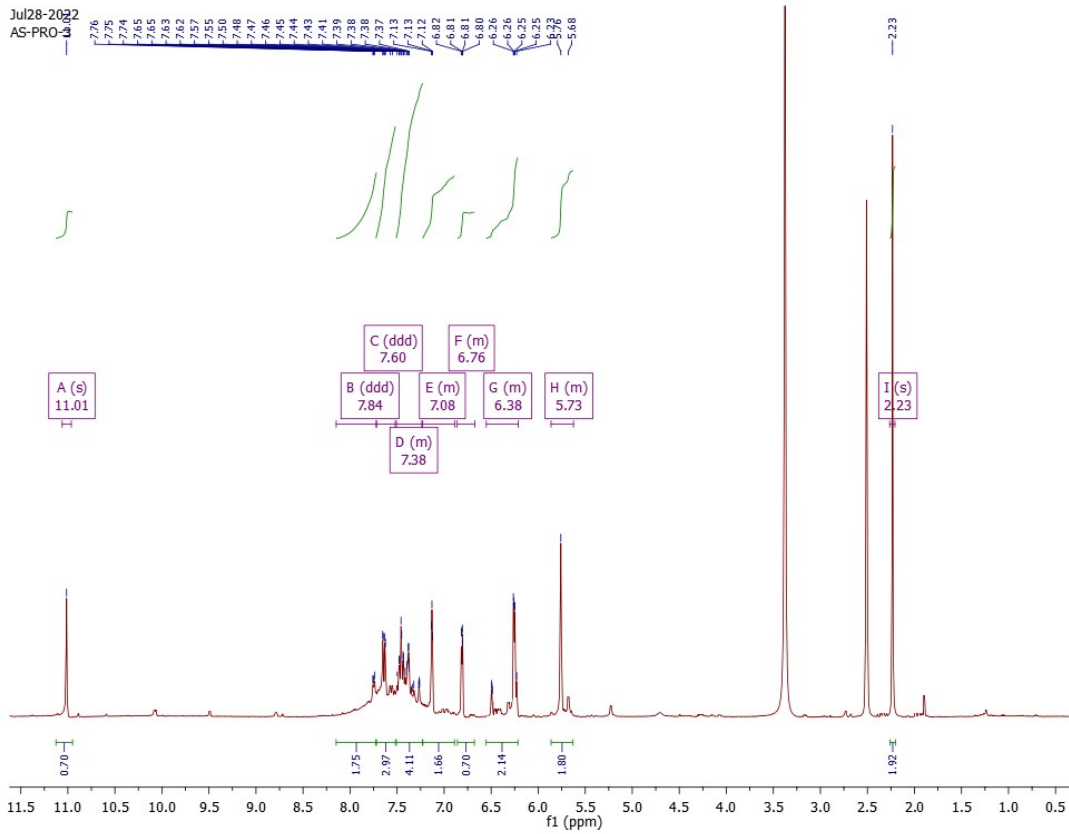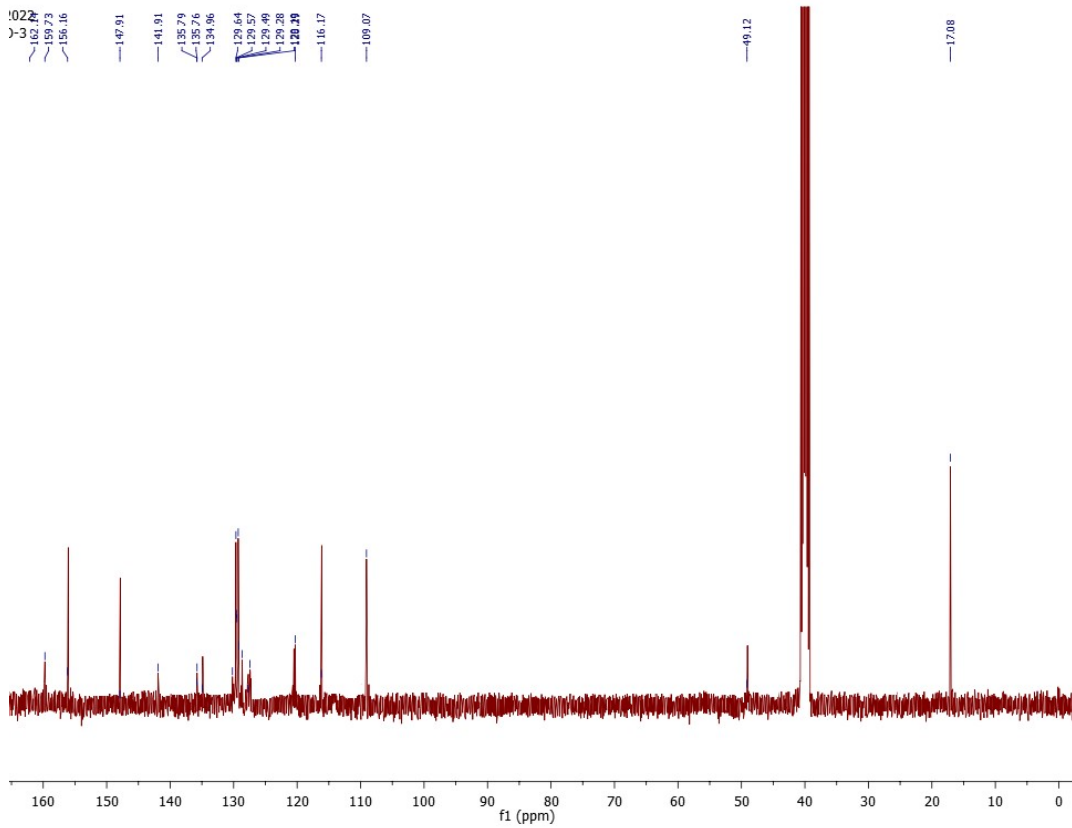

$^{13}\text{C}$   
NMR  
spectrum of  
compound **2h**  
in  
DMSO- $d_6$ .

MS Zoomed Spectrum

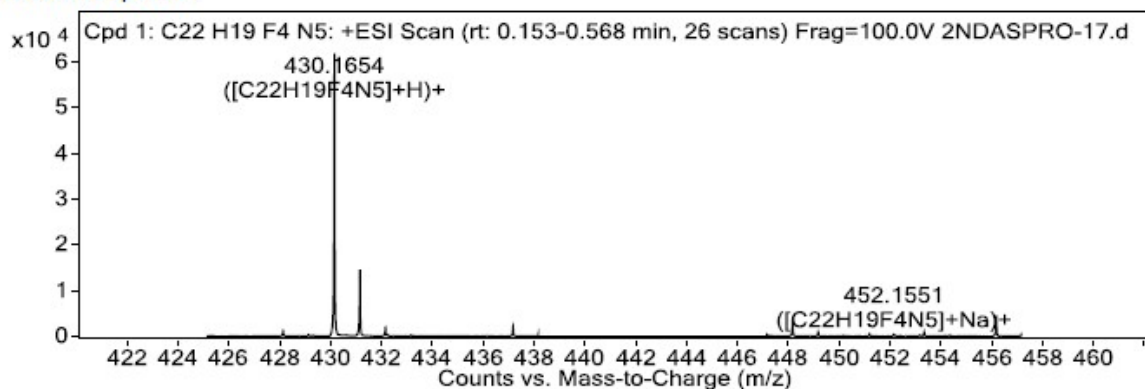

HRMS spectrum of compound **2h**.

<sup>1</sup>H NMR spectrum of compound **2i** in DMSO-d<sub>6</sub>.

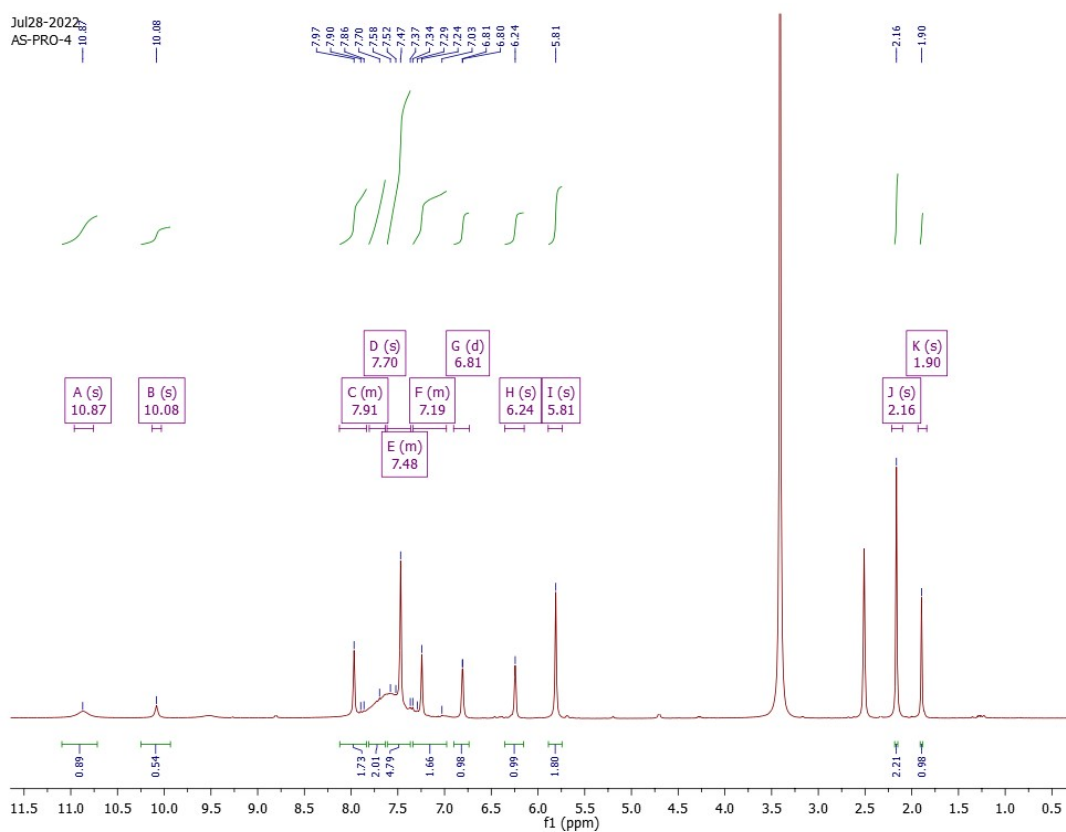

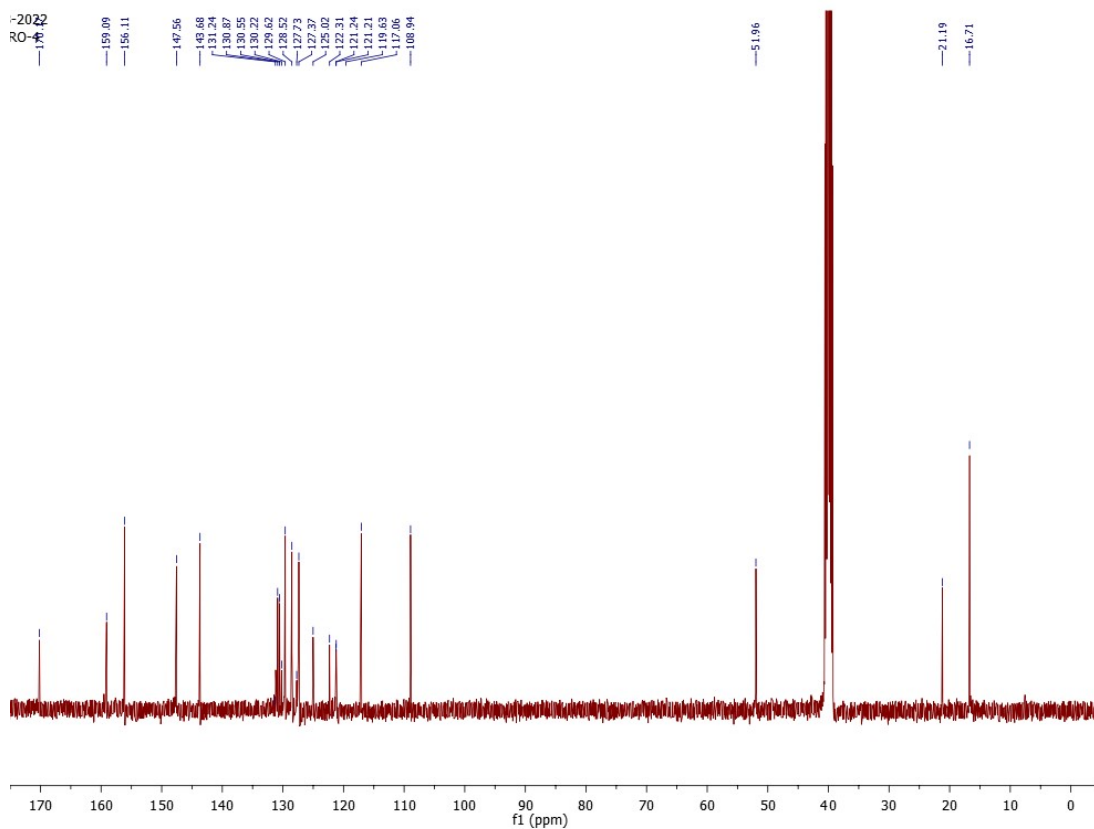

$^{13}\text{C}$  NMR spectrum of compound **2i** in  $\text{DMSO-d}_6$ .

HRMS spectrum of compound **2i**.



MS Zoomed Spectrum

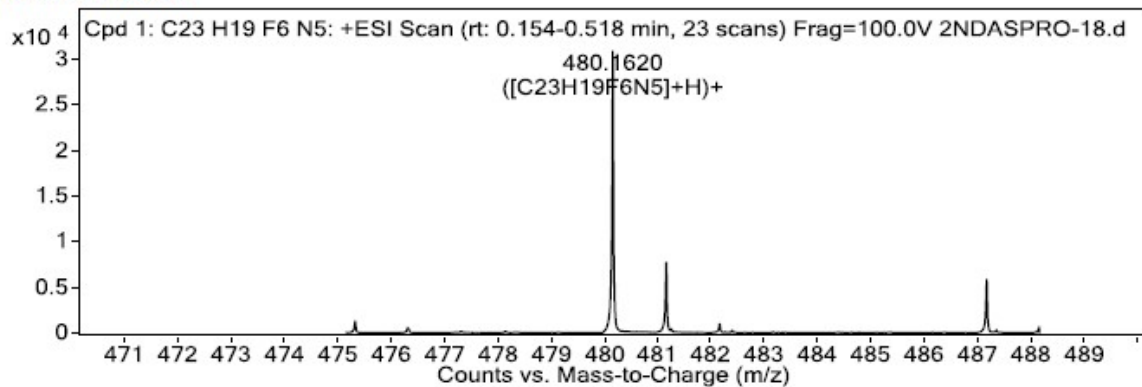

<sup>1</sup>H NMR spectrum of compound **2j** in DMSO-d<sub>6</sub>.

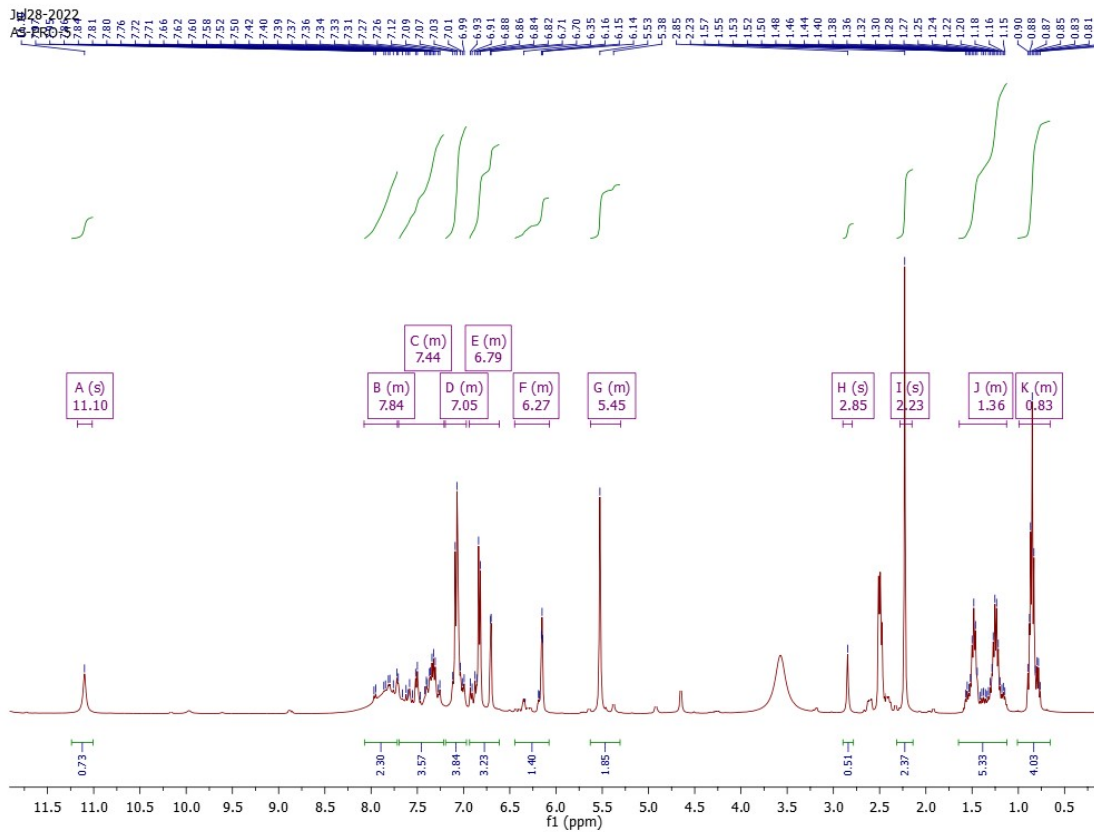

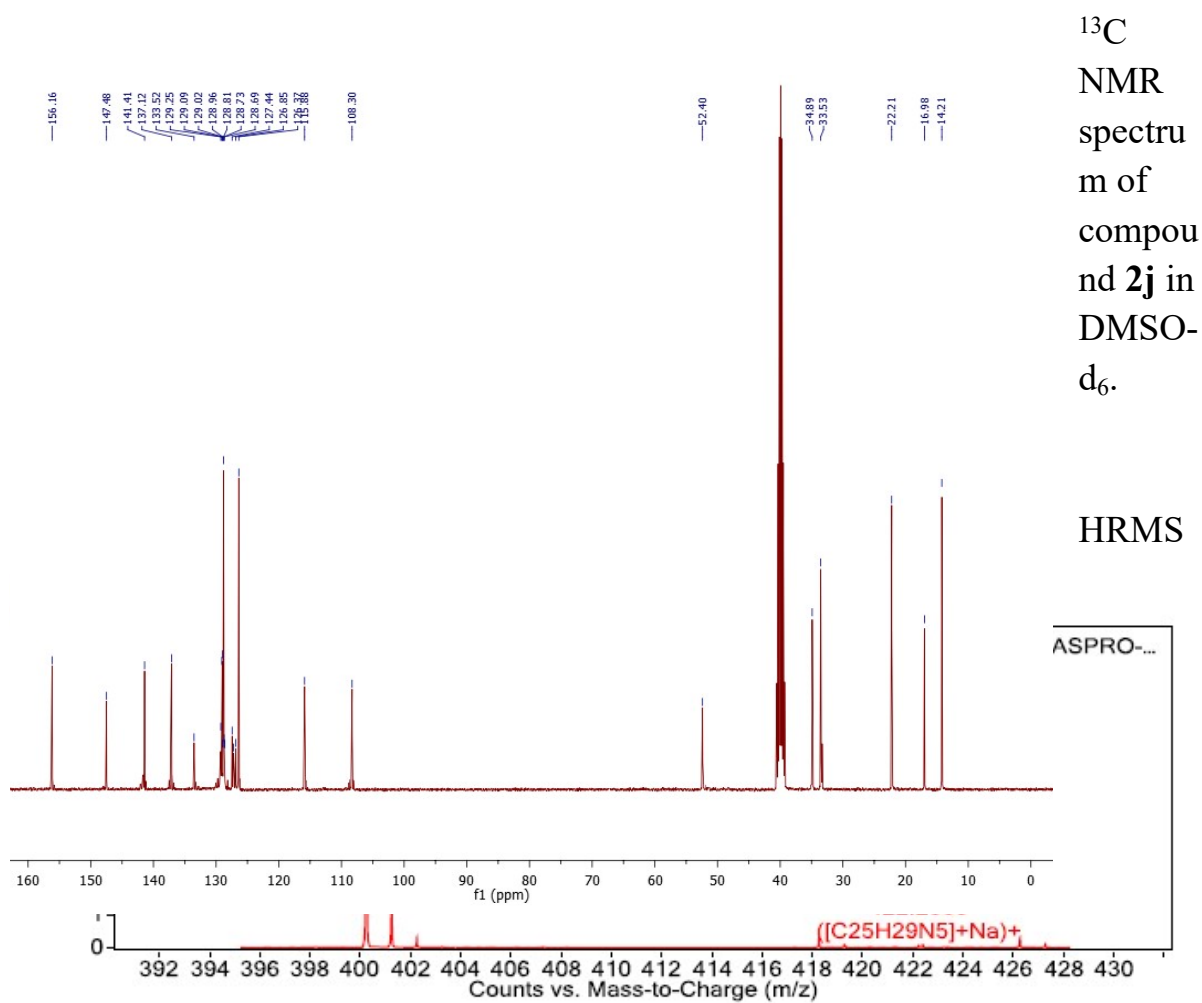

spectrum of compound **2j**.

<sup>1</sup>H NMR spectrum of compound **2k** in DMSO-d<sub>6</sub>.

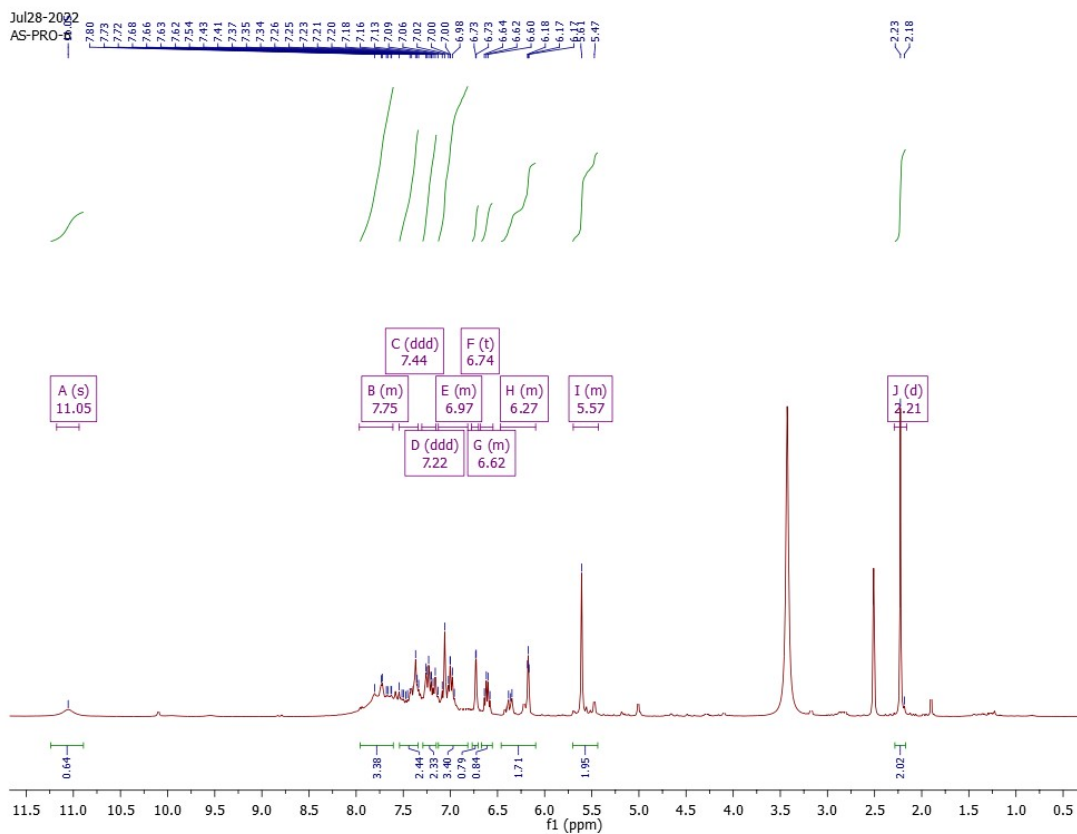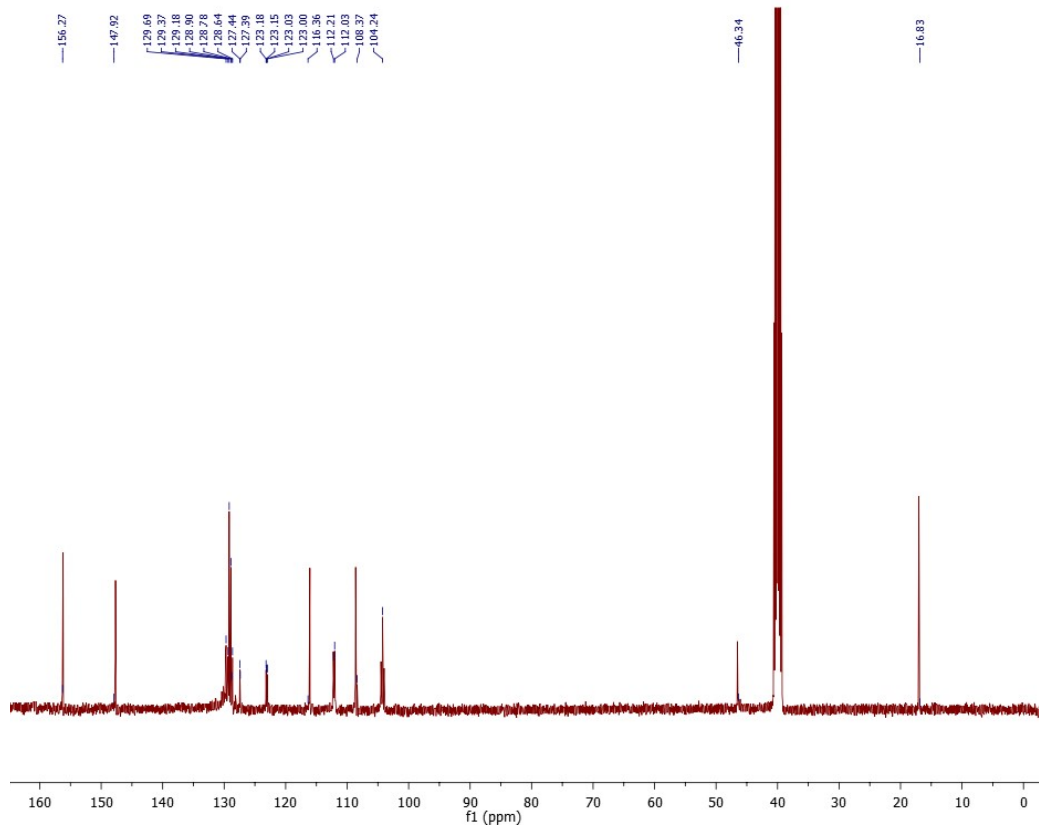

$^{13}\text{C}$  NMR spectrum of compound **2k** in  $\text{DMSO-}d_6$ .

MS Zoomed Spectrum

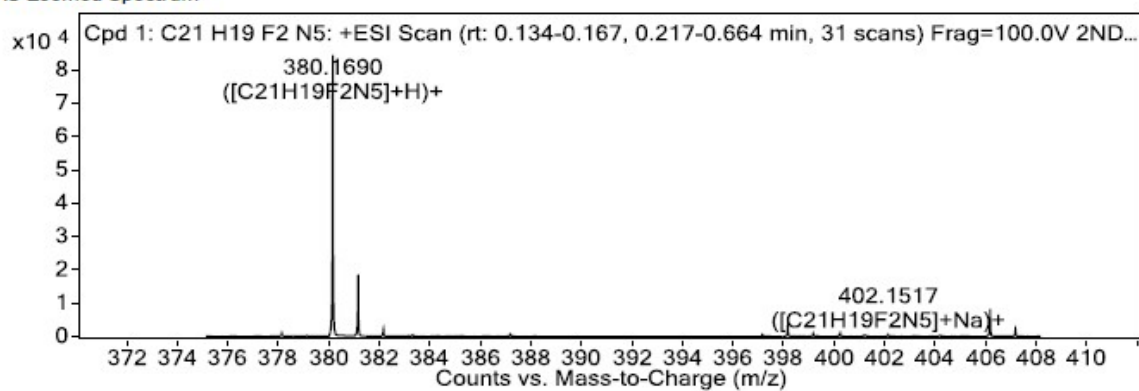

HRMS spectrum of compound **2k**.

<sup>1</sup>H NMR spectrum of compound **2m** in DMSO-d<sub>6</sub>.

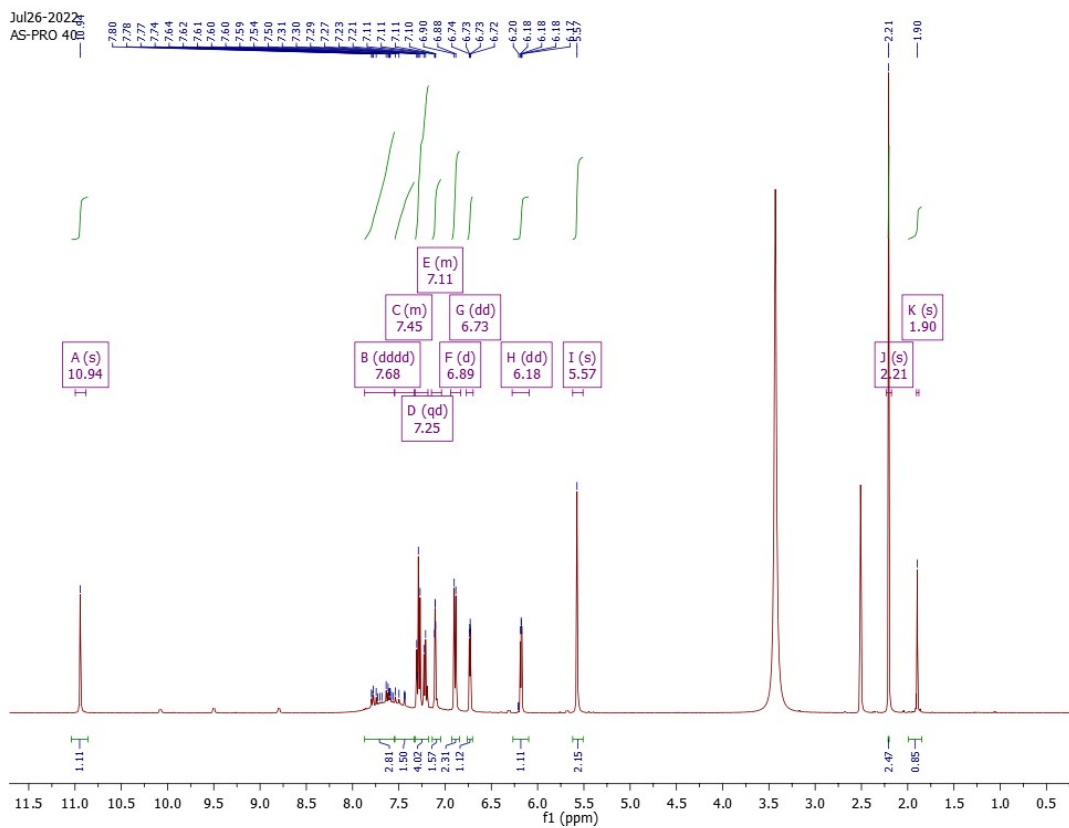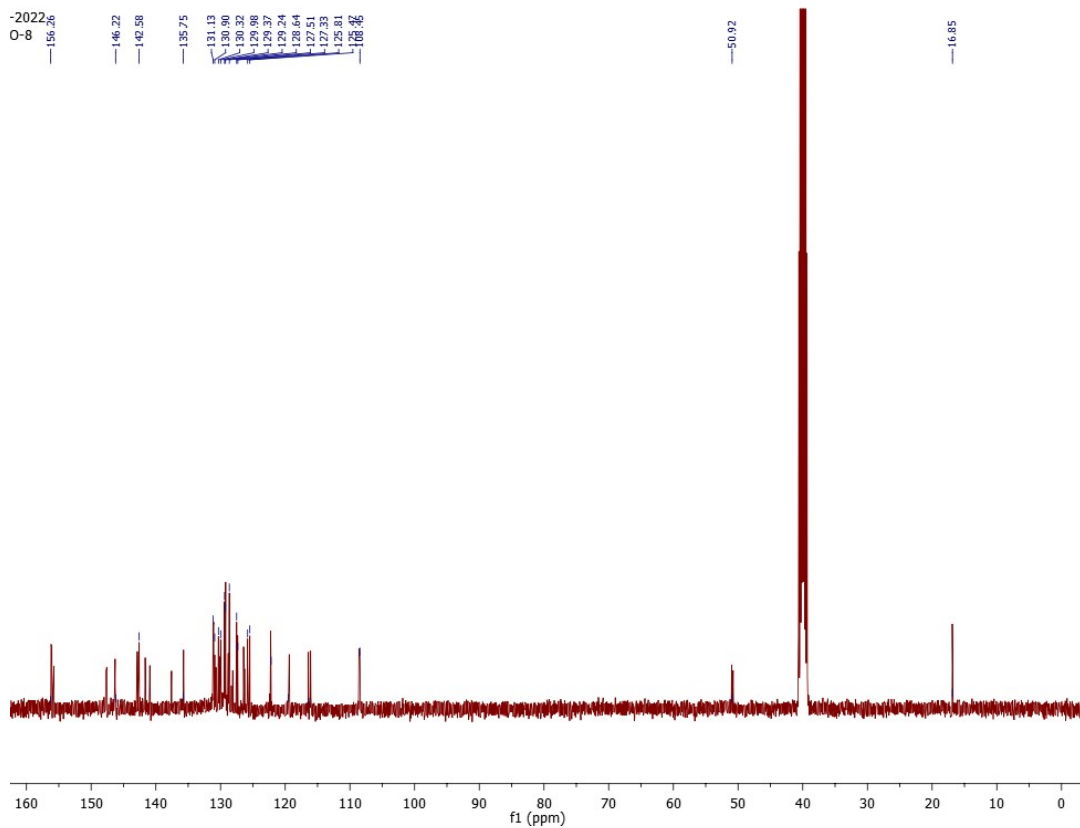

<sup>13</sup>C  
NMR  
spectrum of  
compound  
**2m** in  
DMS  
O-d<sub>6</sub>.

HRM  
S  
spectrum of  
compound  
**2m**.

MS Zoomed Spectrum

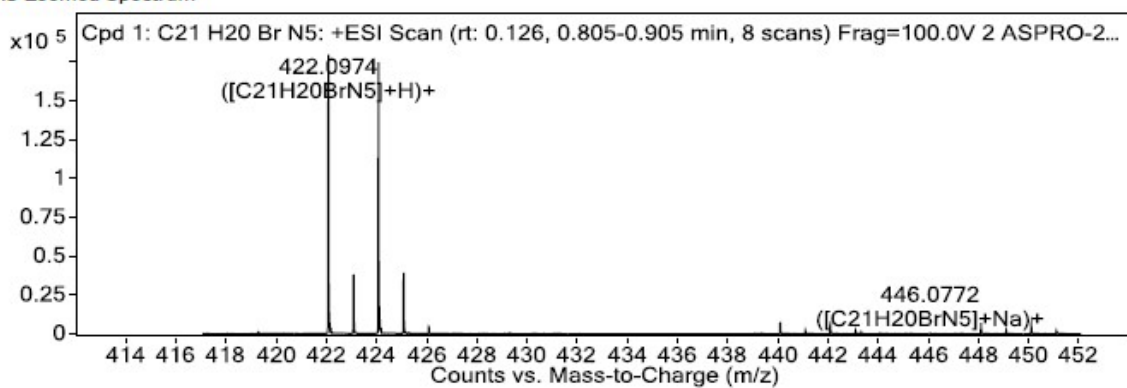

<sup>1</sup>H NMR spectrum of compound **2o** in DMSO-d<sub>6</sub>.

Apr07-2022  
AS-PRO 19

7.83  
7.73  
7.54  
7.51  
7.34  
7.29  
7.27

]

A (s)  
11.07

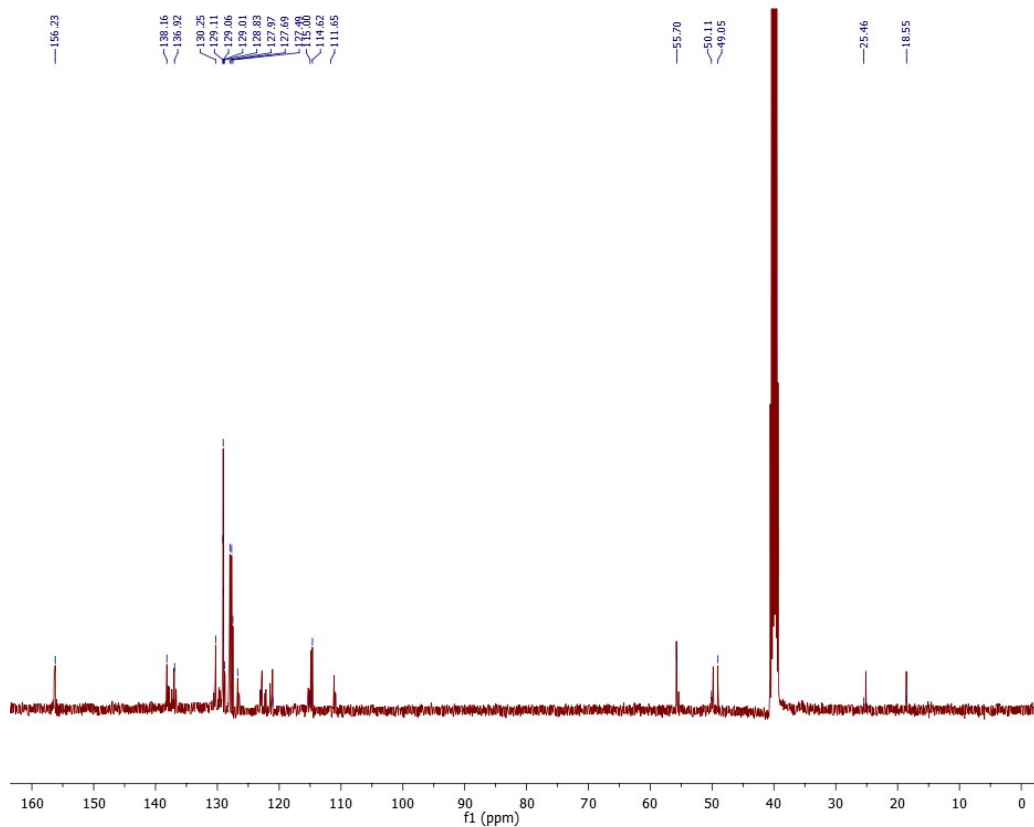

<sup>13</sup>C NMR  
spectrum  
of  
compound  
**2o** in

DMSO-d<sub>6</sub>.

MS Zoomed Spectrum

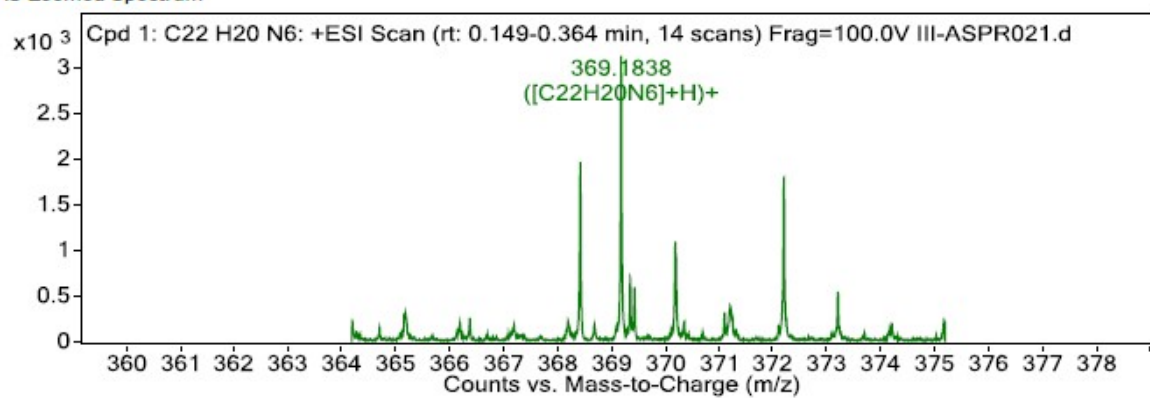

HRMS spectrum of compound **2o**.

$^1\text{H}$  NMR spectrum of compound **2p** in  $\text{DMSO-d}_6$ .

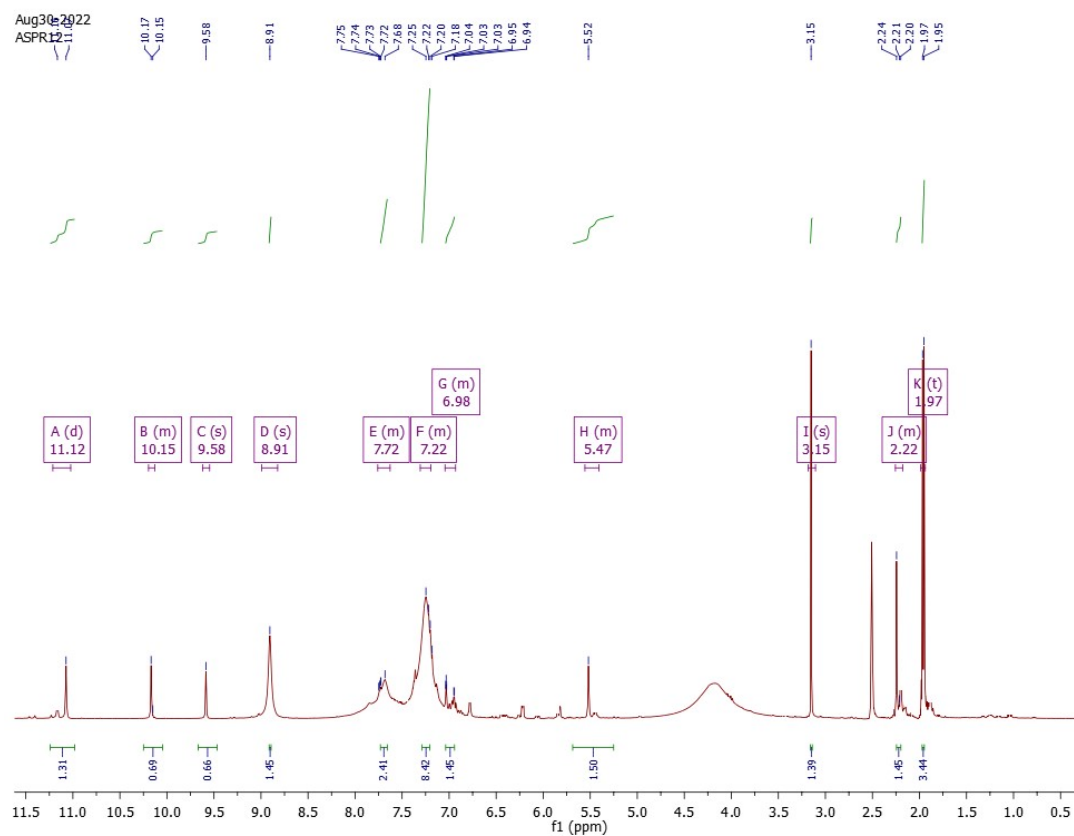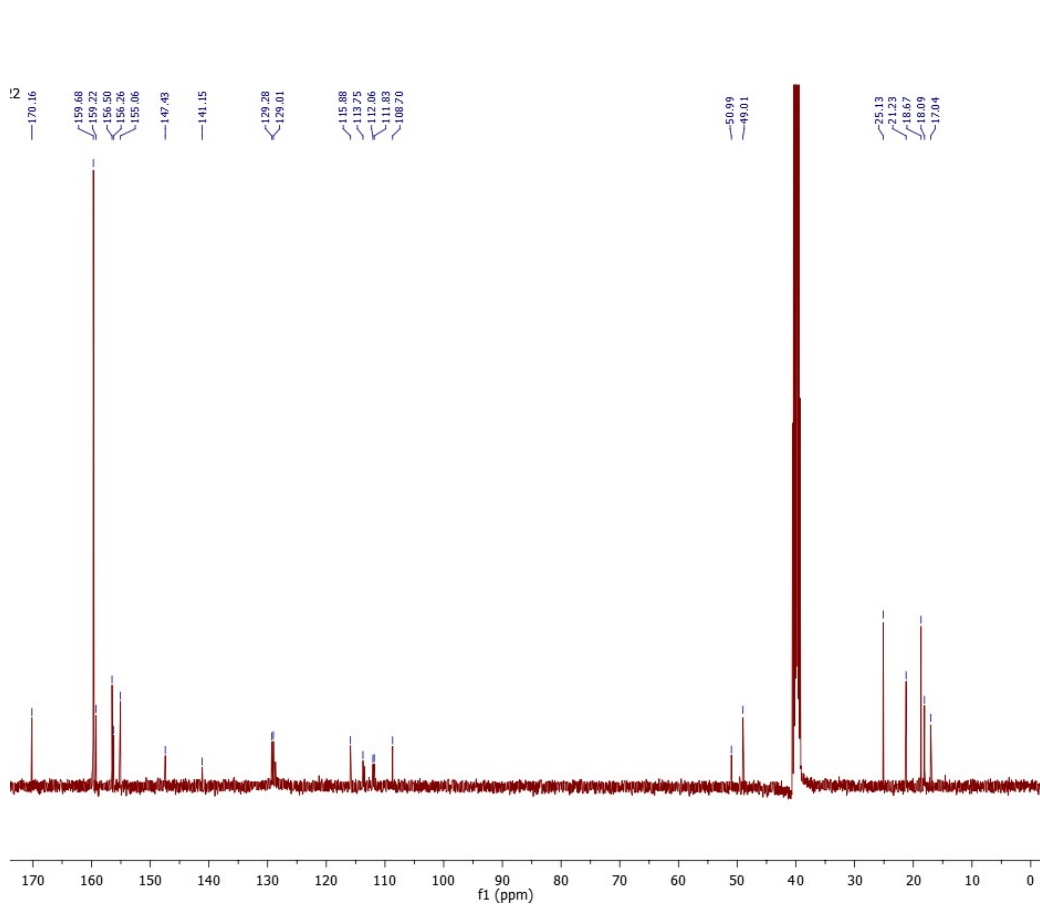

$^{13}\text{C}$   
NMR  
spectrum  
of  
compound **2p**  
in  
 $\text{DMSO-d}_6$ .



MS Zoomed Spectrum

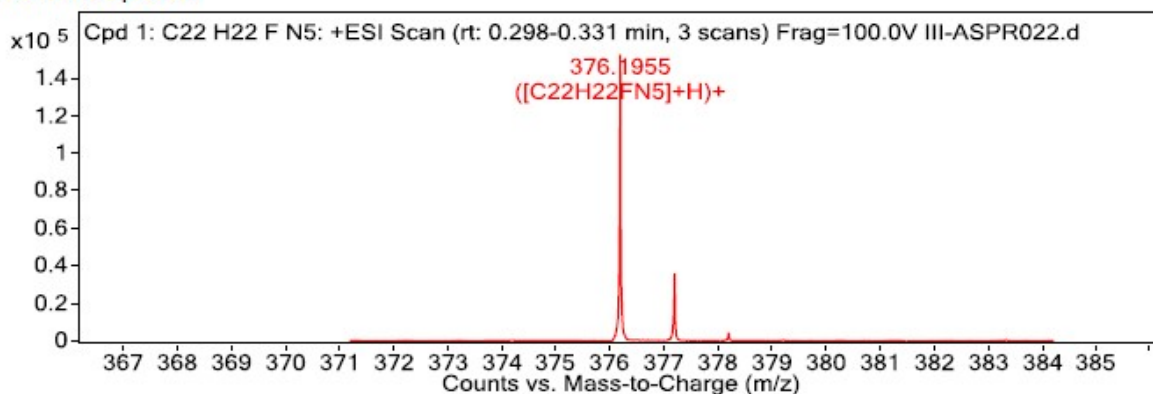

HRMS spectrum of compound **2p**.

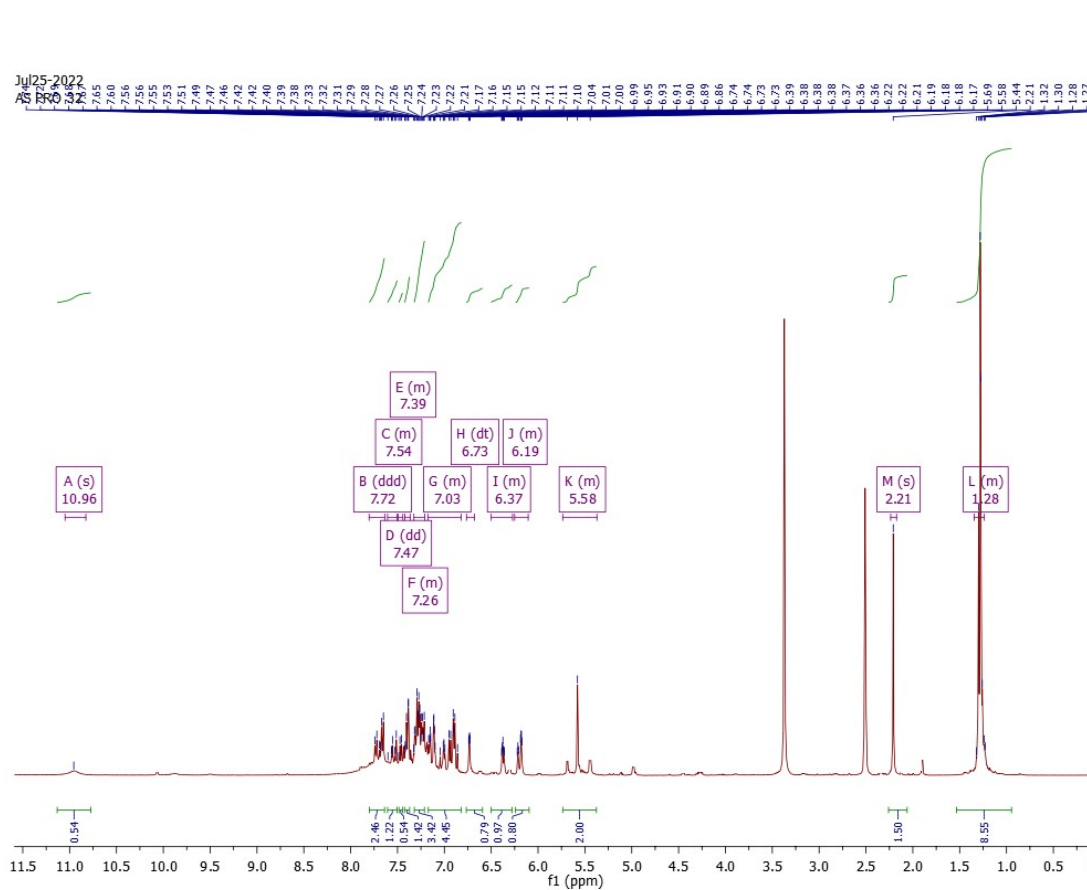

<sup>1</sup>H NMR spectrum of compound **2q** in DMSO-d<sub>6</sub>.

$^{13}\text{C}$  NMR spectrum of compound **2q** in  $\text{DMSO-d}_6$ .

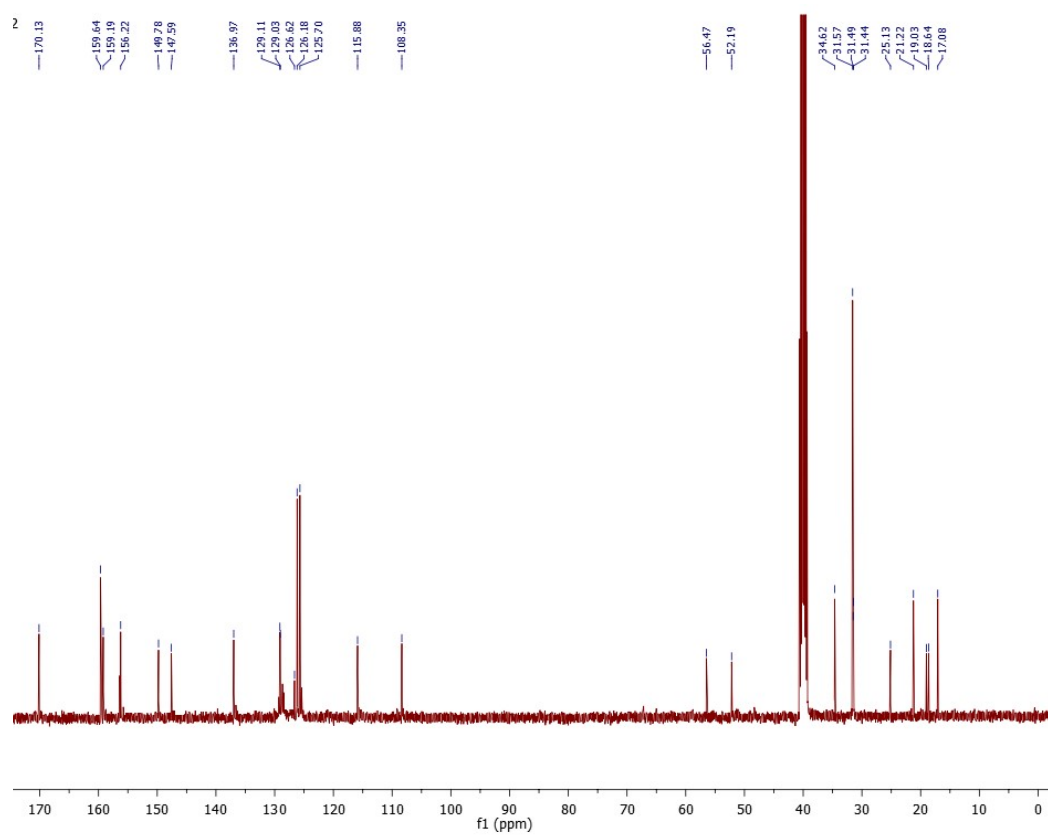

# HRMS spectrum of compound **2q**.

MS Zoomed Spectrum

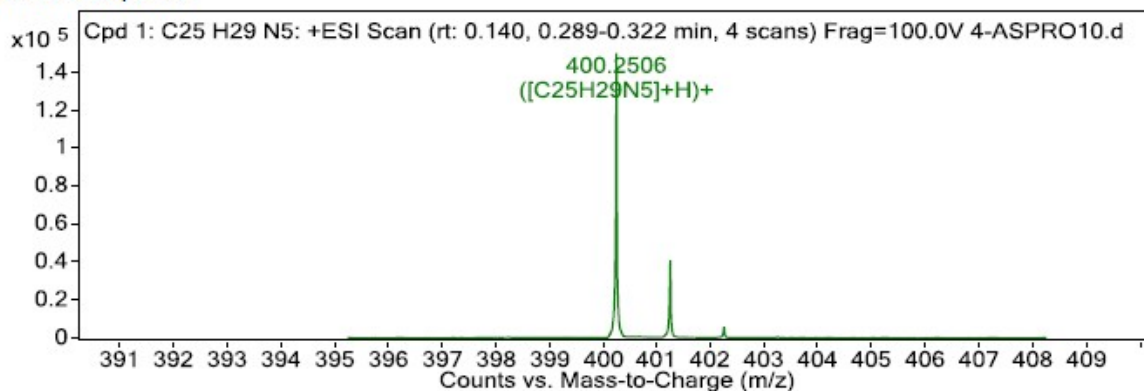

# <sup>1</sup>H NMR spectrum of compound **2r** in DMSO-d<sub>6</sub>.

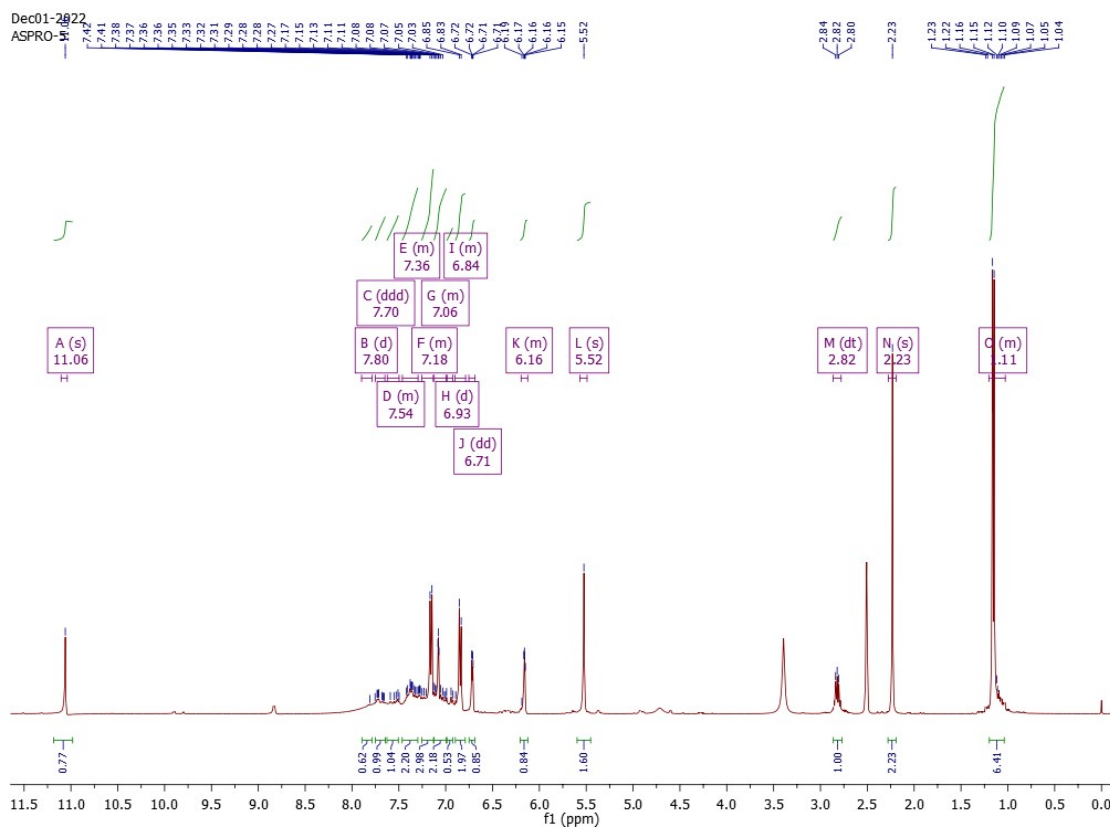

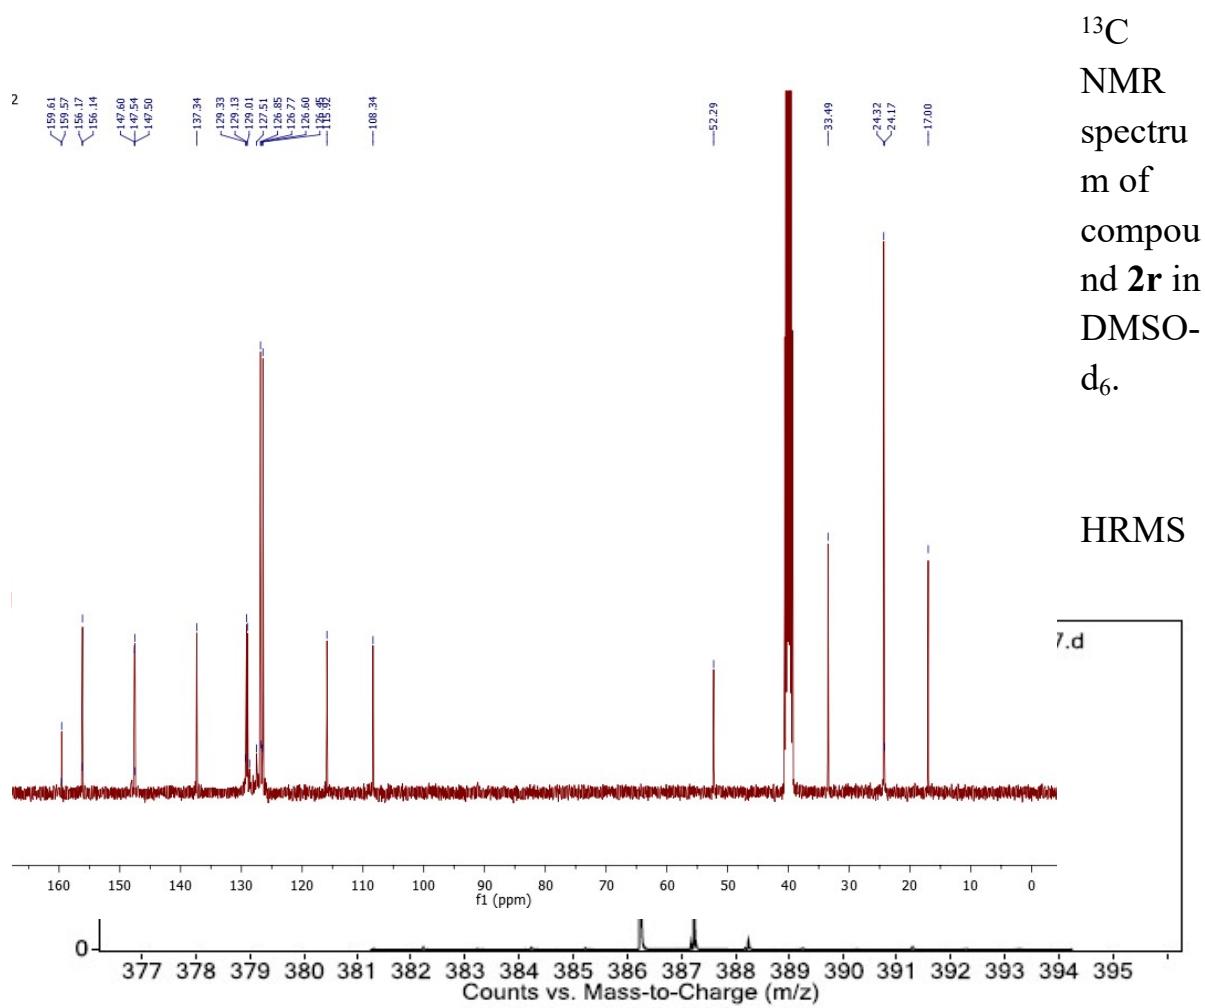

spectrum of compound **2r**.

<sup>1</sup>H NMR spectrum of compound **3a** in DMSO-d<sub>6</sub>.

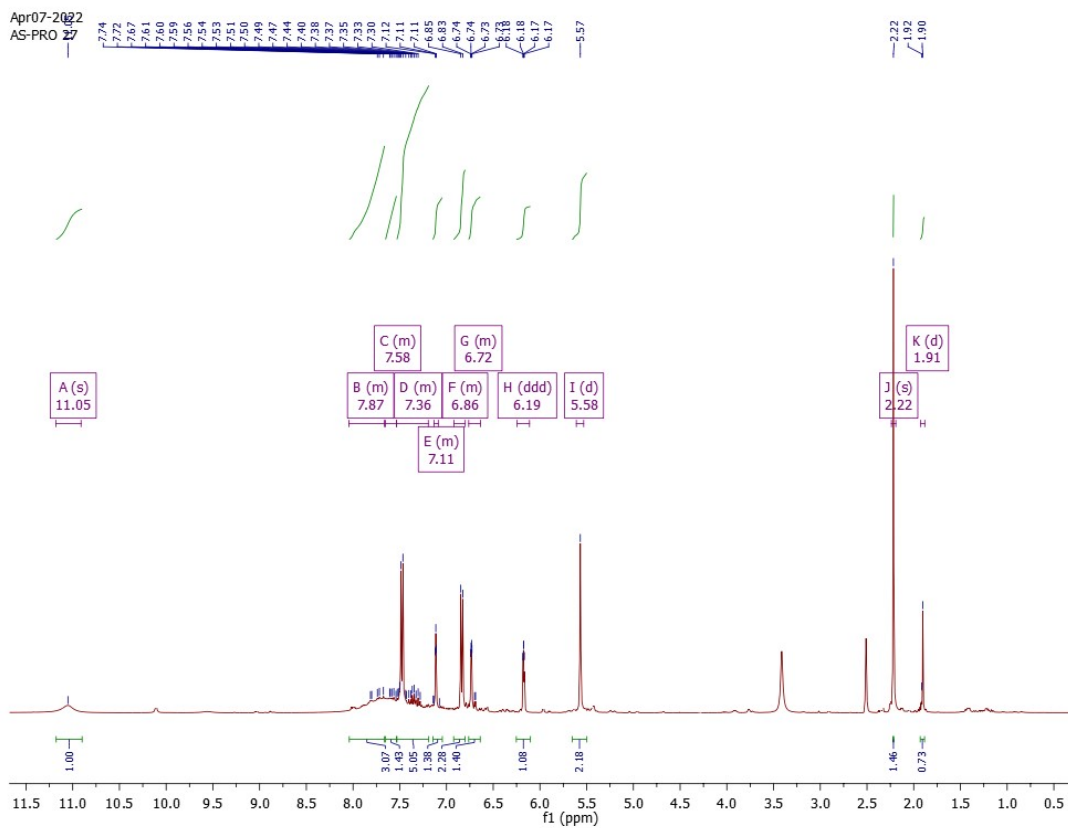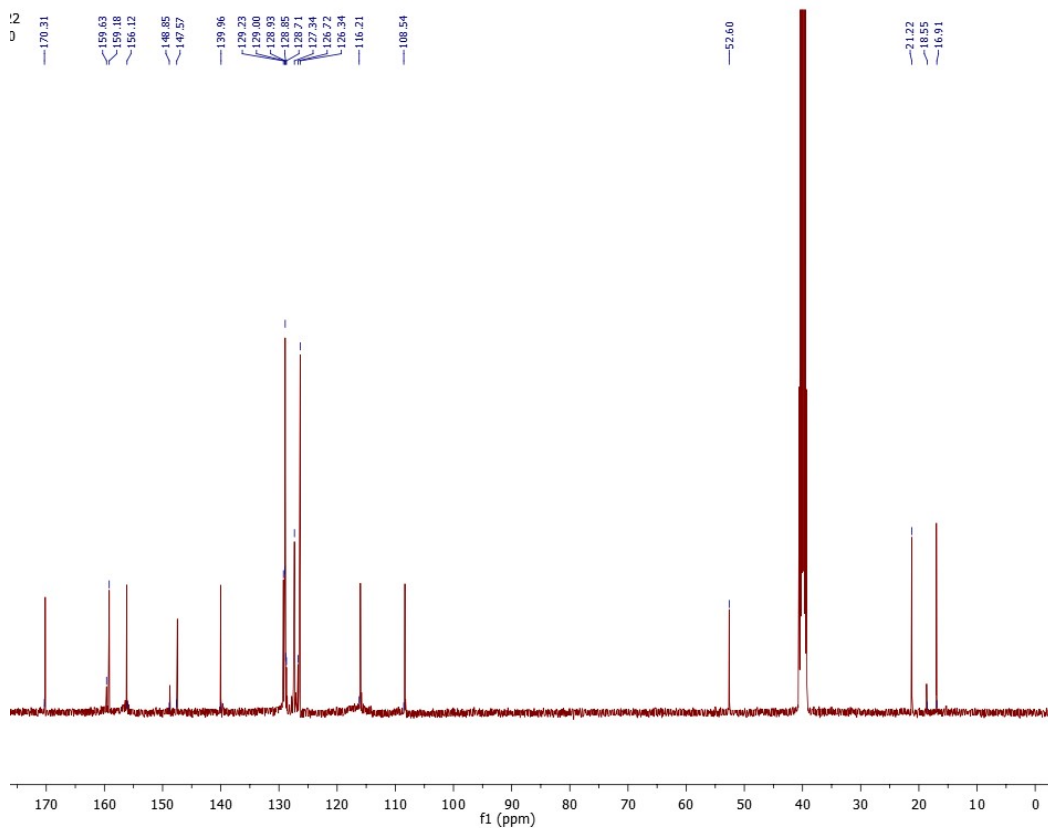

$^{13}\text{C}$   
NMR  
spectrum  
of  
compound **3a** in  
 $\text{DMSO-}d_6$ .

HRMS spectrum of compound **3a**.

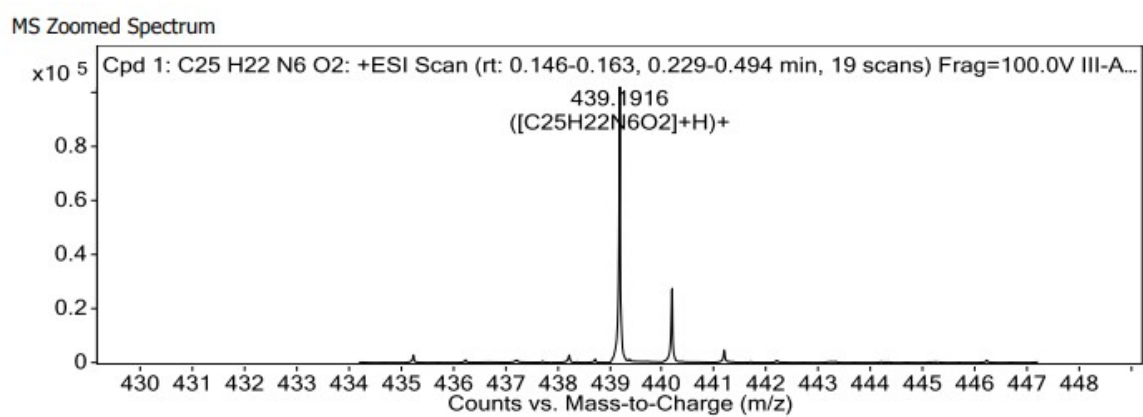

<sup>1</sup>H NMR spectrum of compound **3b** in DMSO-d<sub>6</sub>.

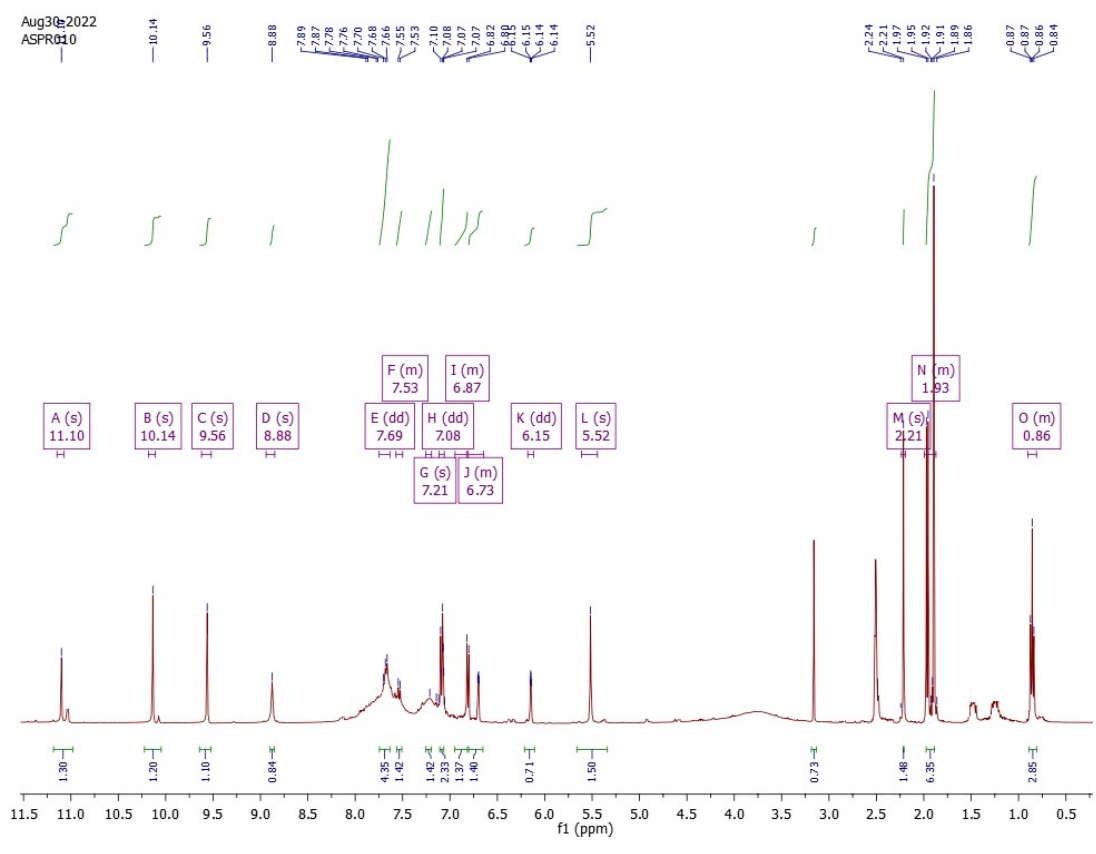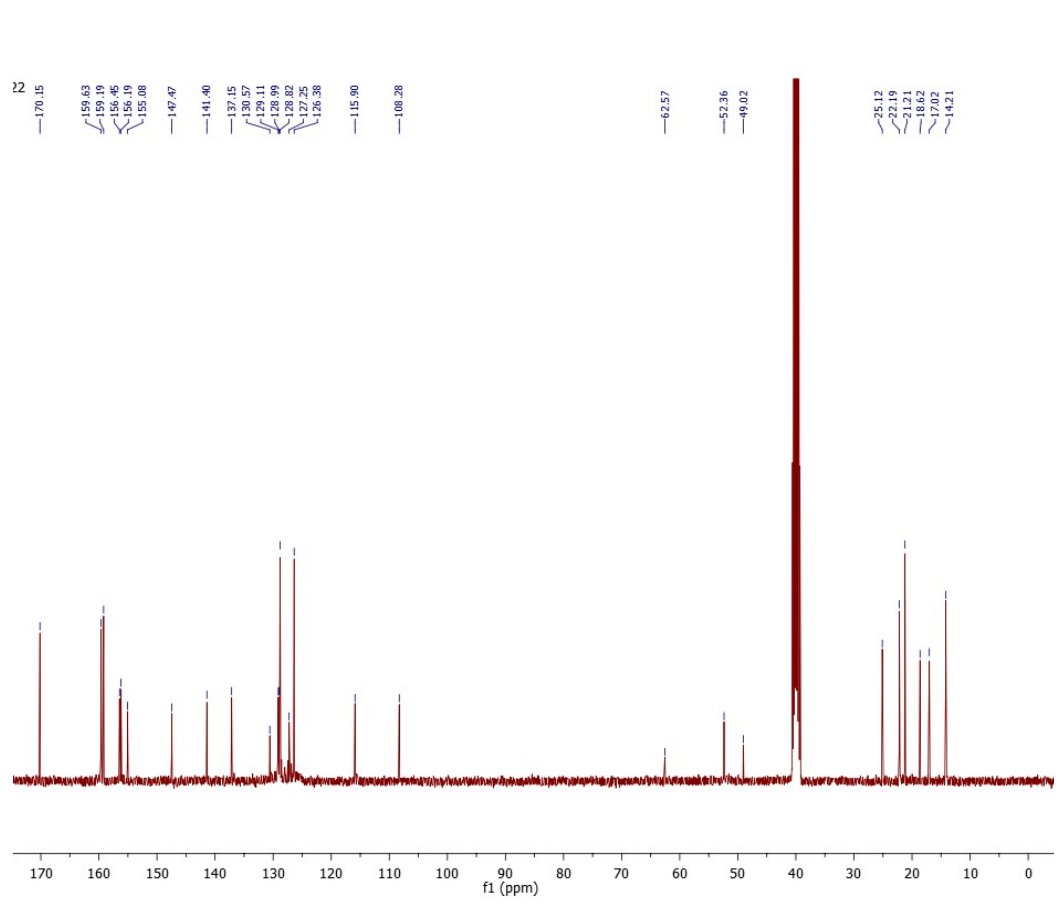

<sup>13</sup>C  
NMR  
spectrum  
of  
compound  
**3b**  
in  
DM  
SO-  
d<sub>6</sub>.

HRMS spectrum of compound **3b**.

MS Zoomed Spectrum

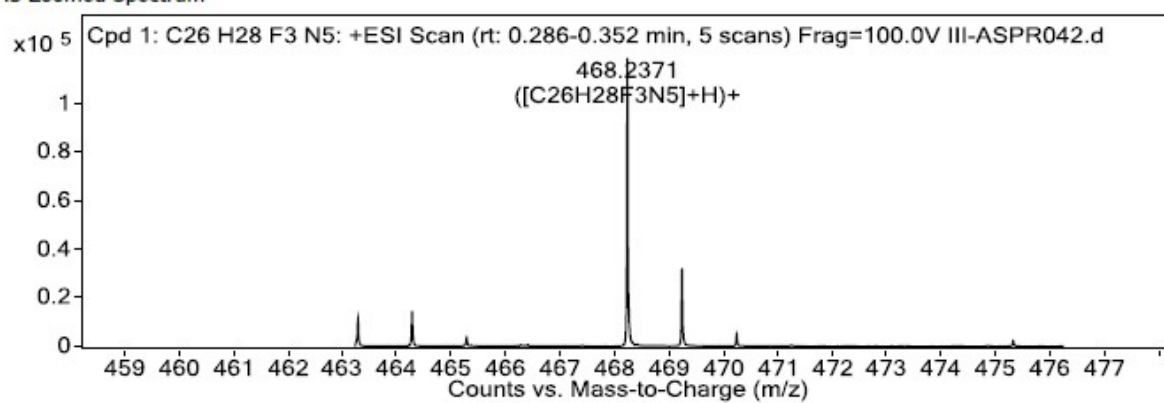

<sup>1</sup>H NMR spectrum of compound **3c** in DMSO-d<sub>6</sub>.



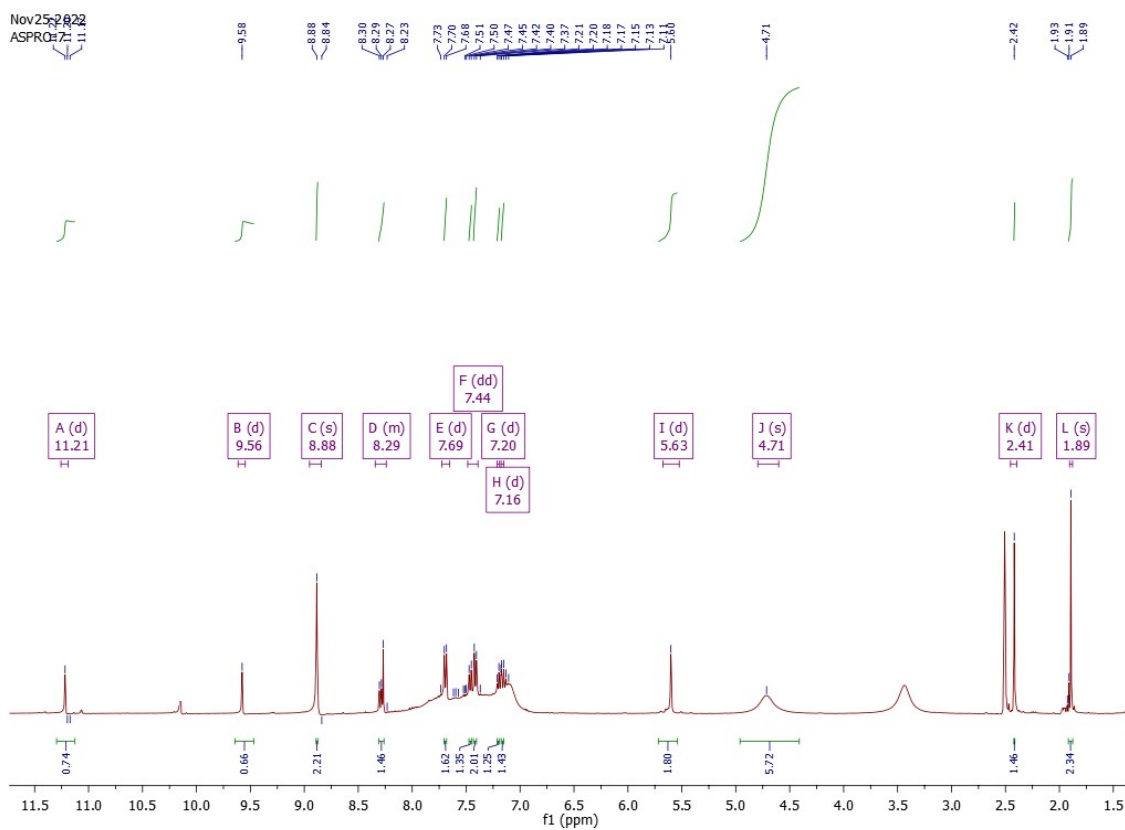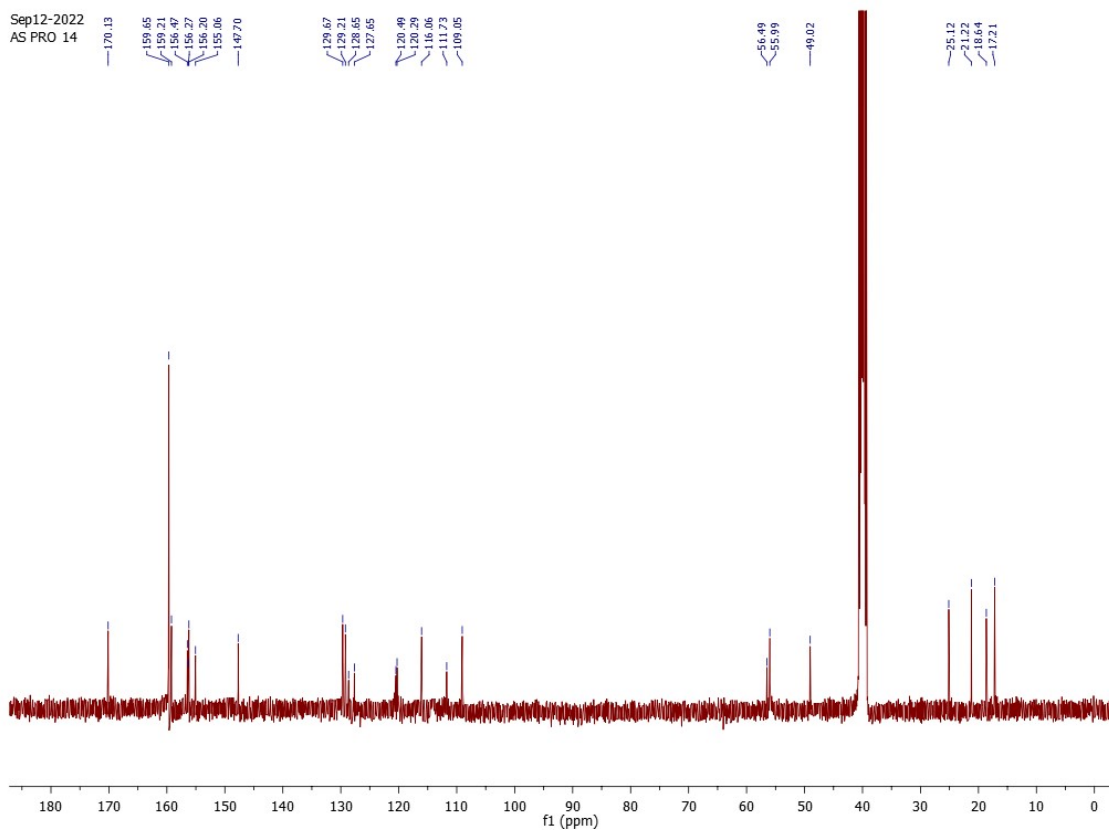

<sup>13</sup>C  
NMR  
spectrum  
of  
compound **3c**  
in  
DMSO-  
d<sub>6</sub>.

HRMS spectrum of compound **3c**.

$^1\text{H}$  NMR spectrum of compound **3d** in  $\text{DMSO-d}_6$ .

MS Zoomed Spectrum

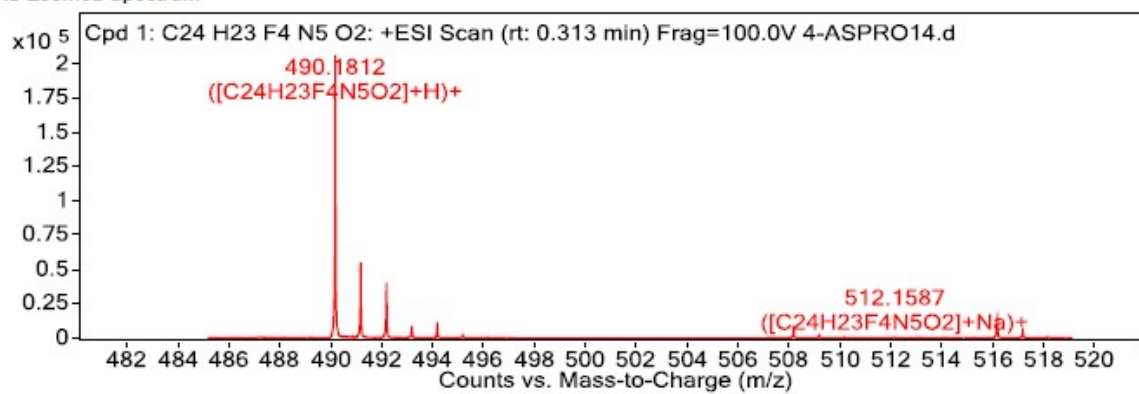

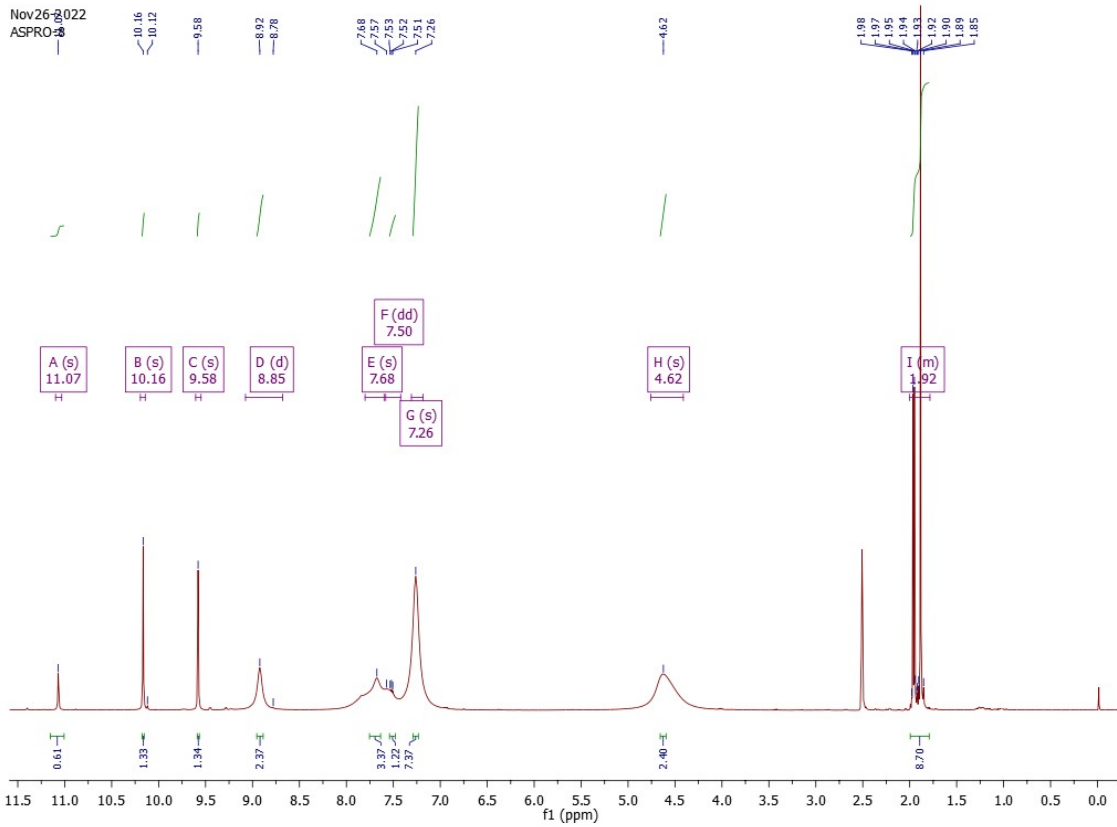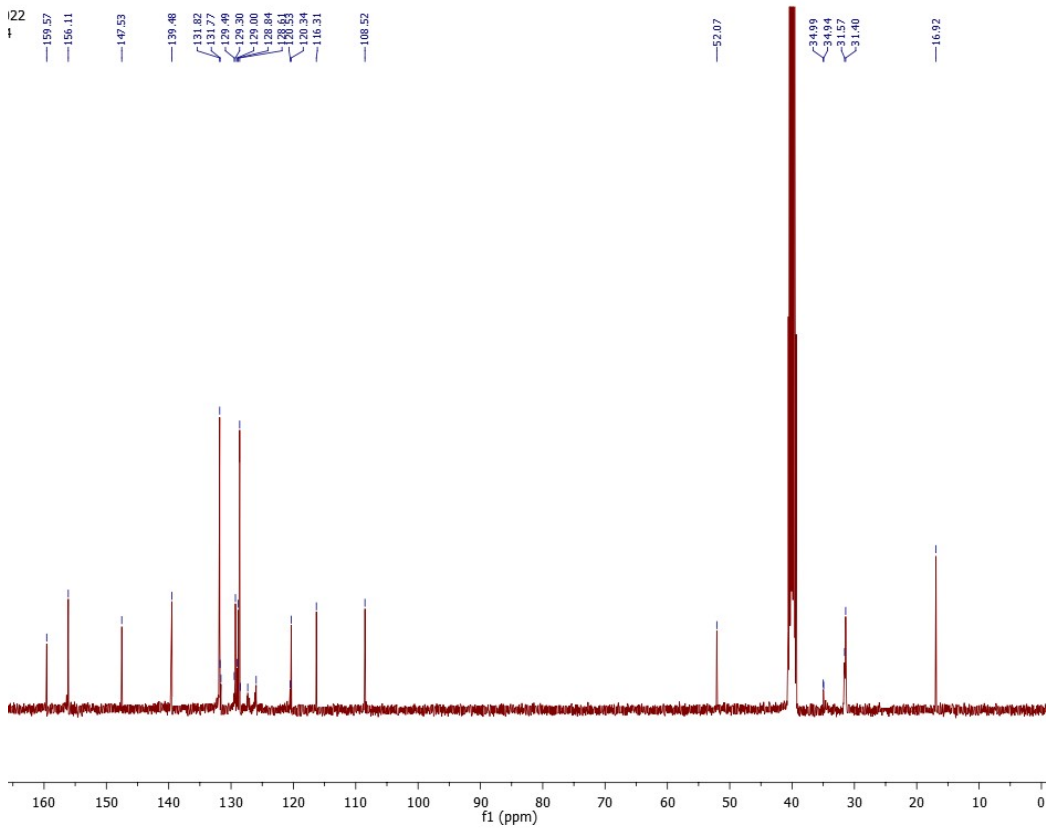

$^{13}\text{C}$   
NMR  
spectrum  
of  
compound **3d**  
in  
DMSO-  
 $\text{d}_6$ .

## HRMS spectrum of compound **3d**.

### MS Zoomed Spectrum

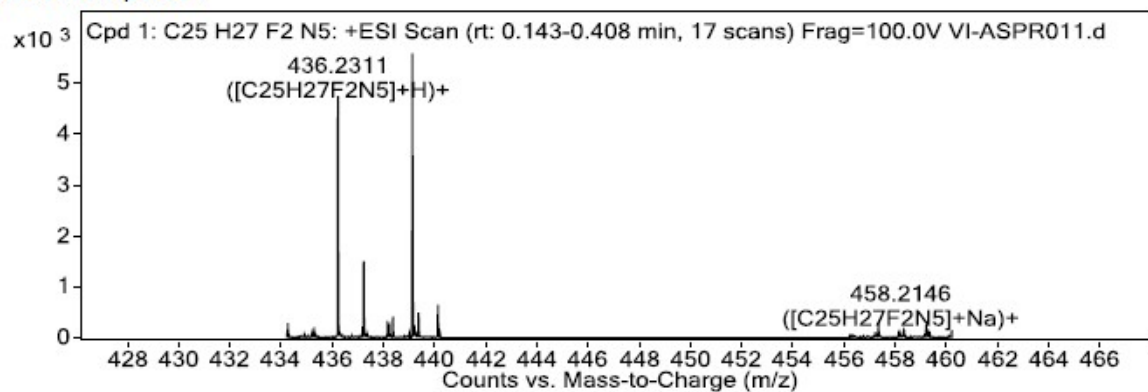

## <sup>1</sup>H NMR spectrum of compound **3e** in DMSO-d<sub>6</sub>.

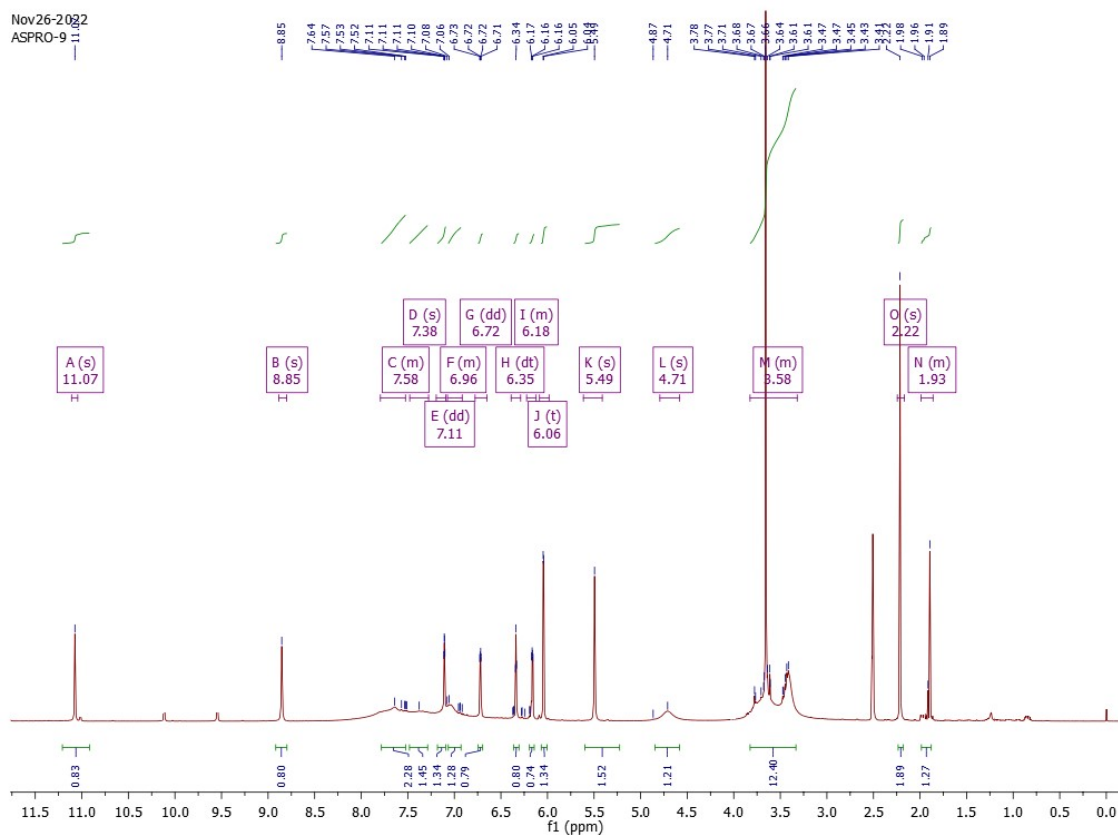

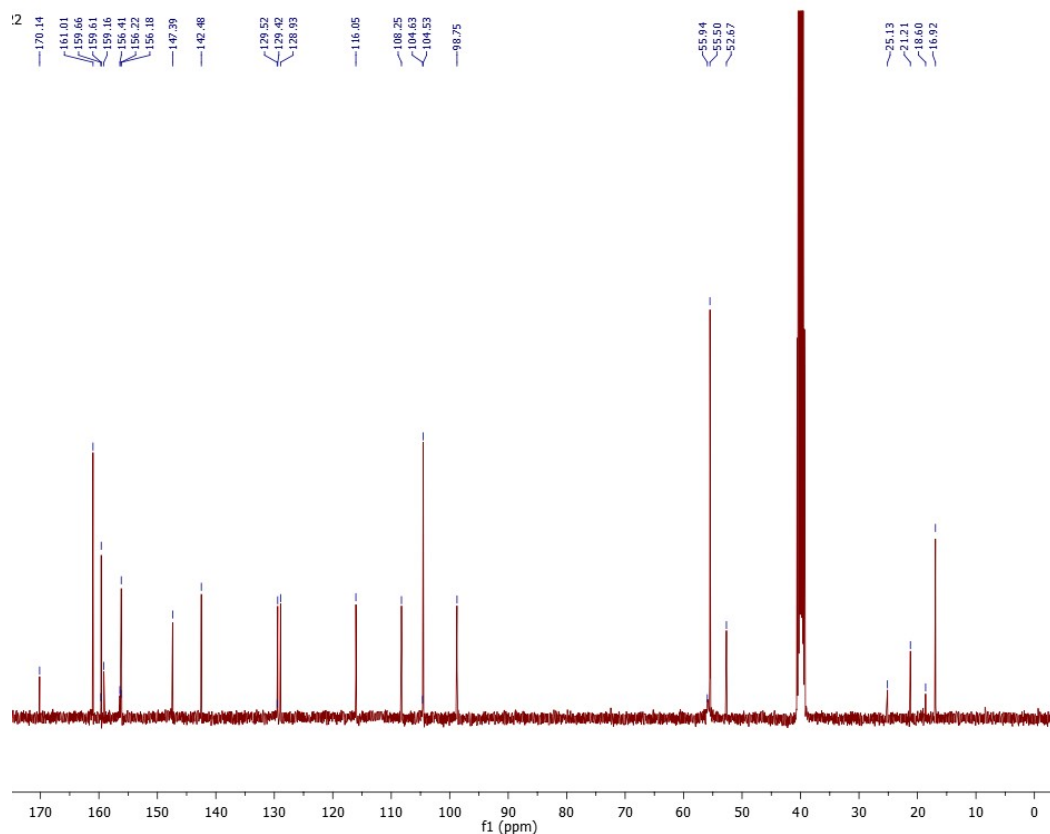

$^{13}\text{C}$   
NMR  
spectrum  
of  
compound **3e**  
in  
 $\text{DMSO-}d_6$ .

HRMS spectrum of compound **3e**.

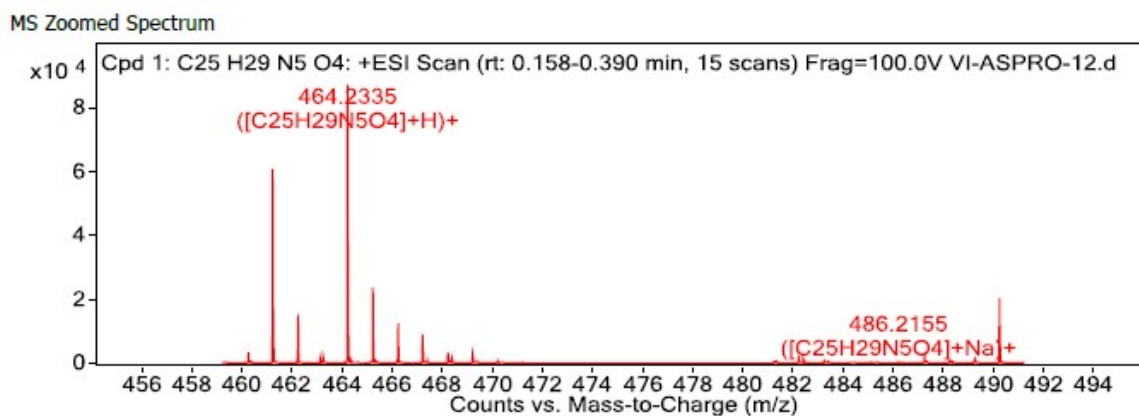

$^1\text{H}$  NMR spectrum of compound **3f** in  $\text{DMSO-d}_6$ .

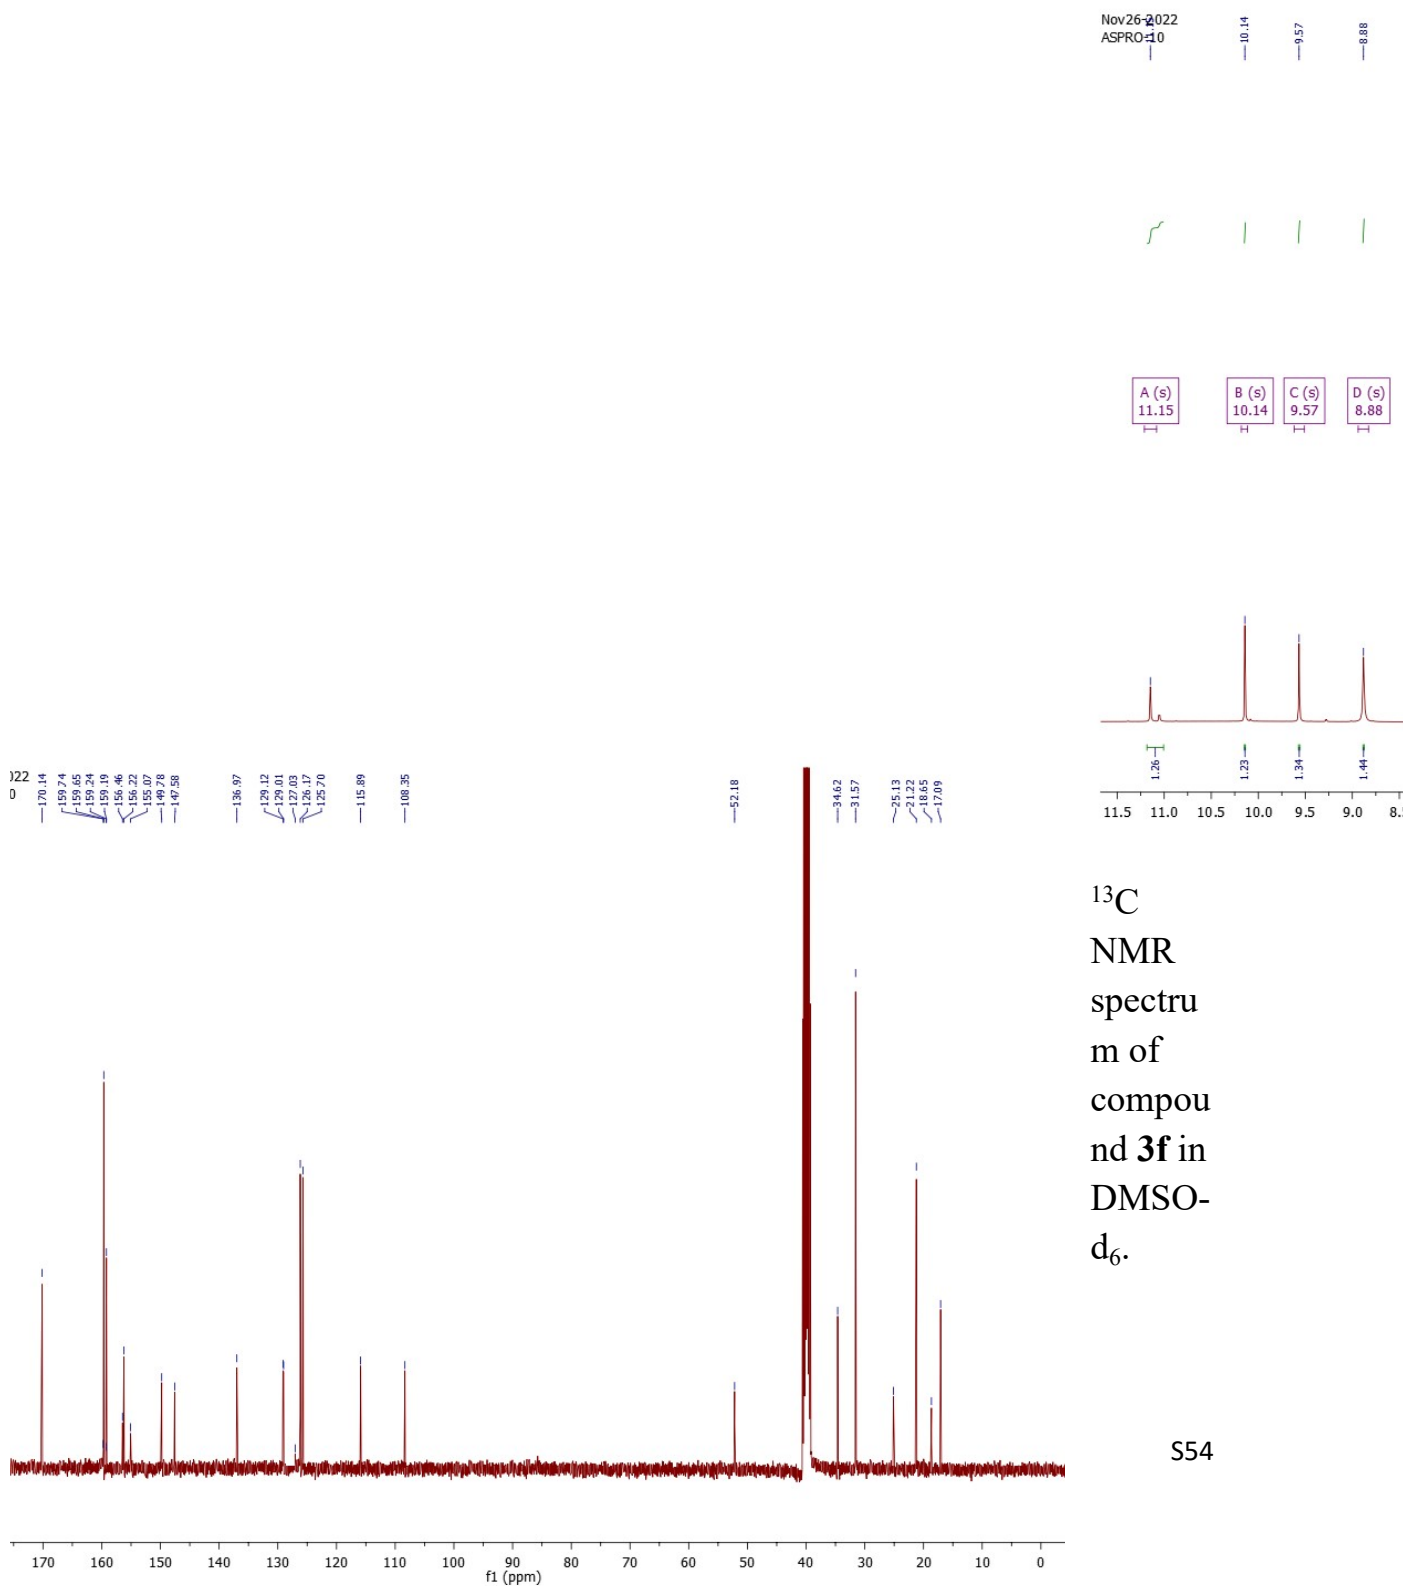

MS Zoomed Spectrum

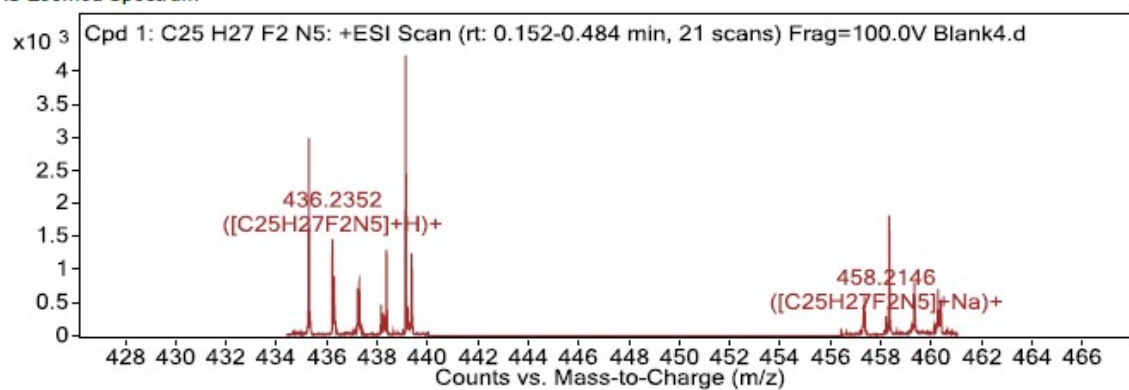

HRMS spectrum of compound **3f**.

<sup>1</sup>H NMR spectrum of compound **3g** in DMSO-d<sub>6</sub>.

Nov 26 2022  
ASB

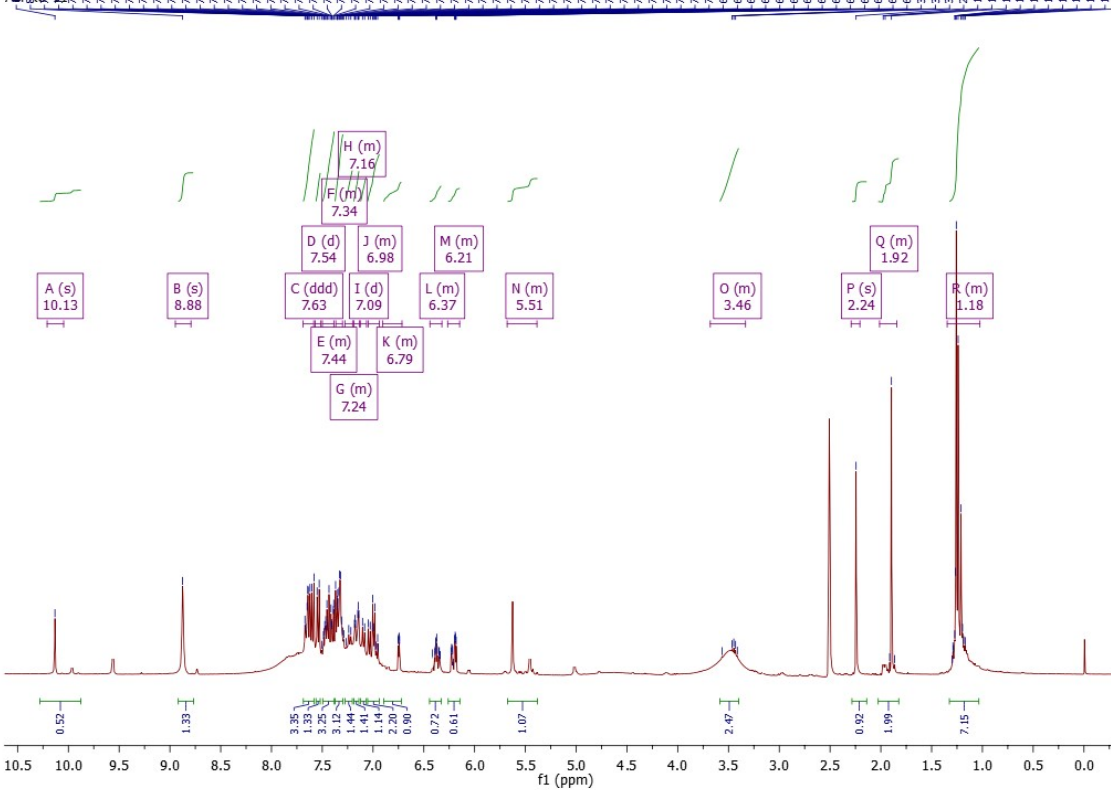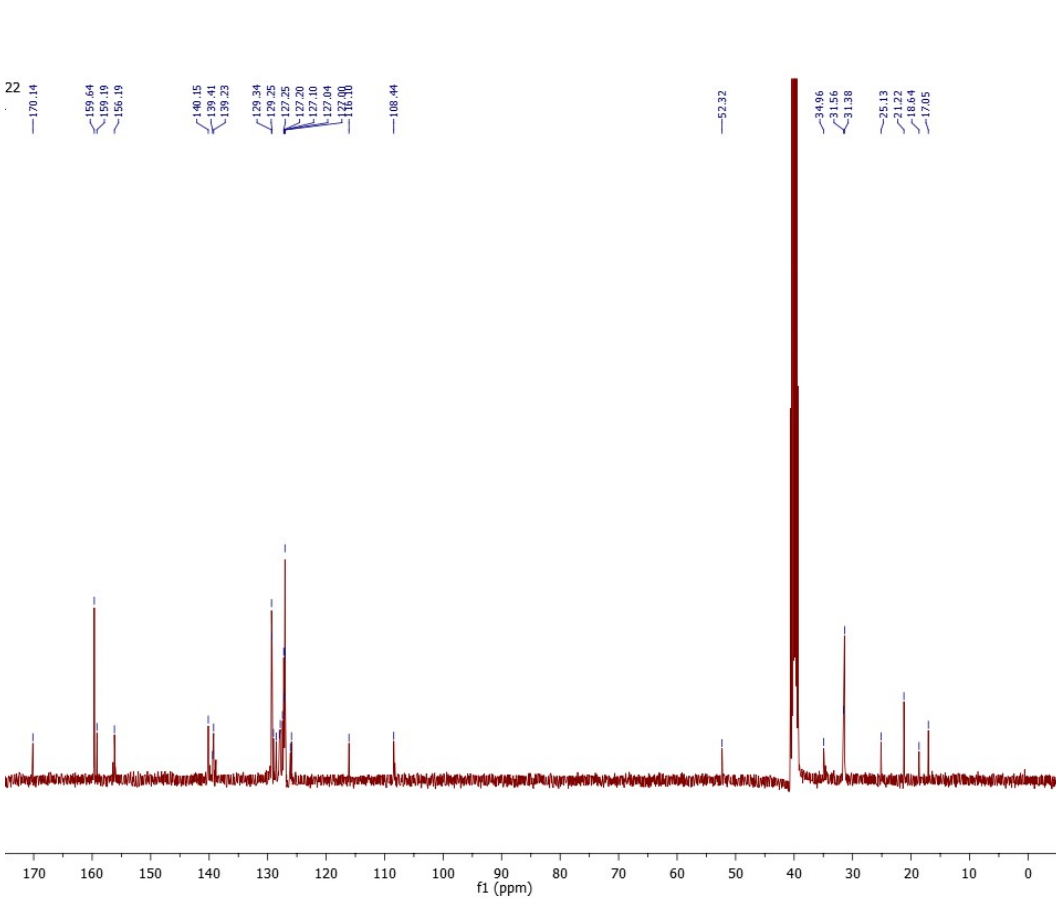

<sup>13</sup>C  
NMR  
spectrum  
of  
compound **3g** in  
DMSO-  
d<sub>6</sub>.



HRMS spectrum of compound **3g**.

MS Zoomed Spectrum

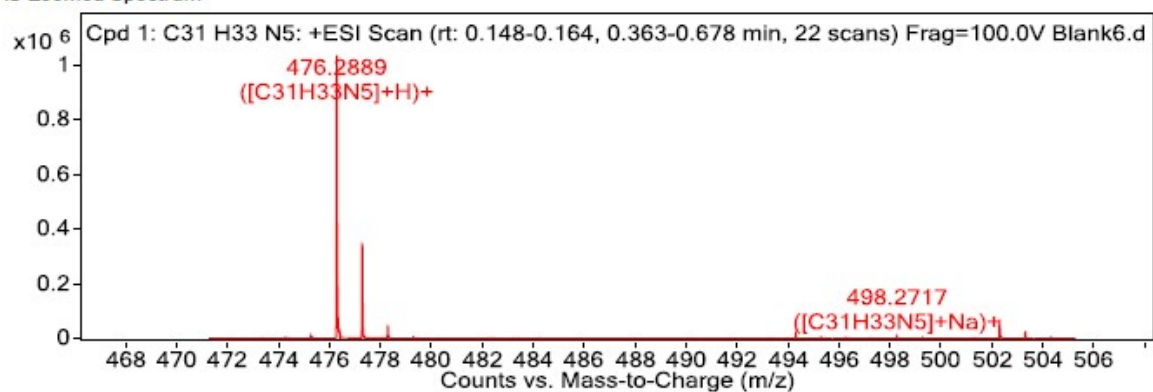

$^1H$  NMR spectrum of compound **3h** in DMSO- $d_6$ .

Nov26-2022  
ASPRO-14

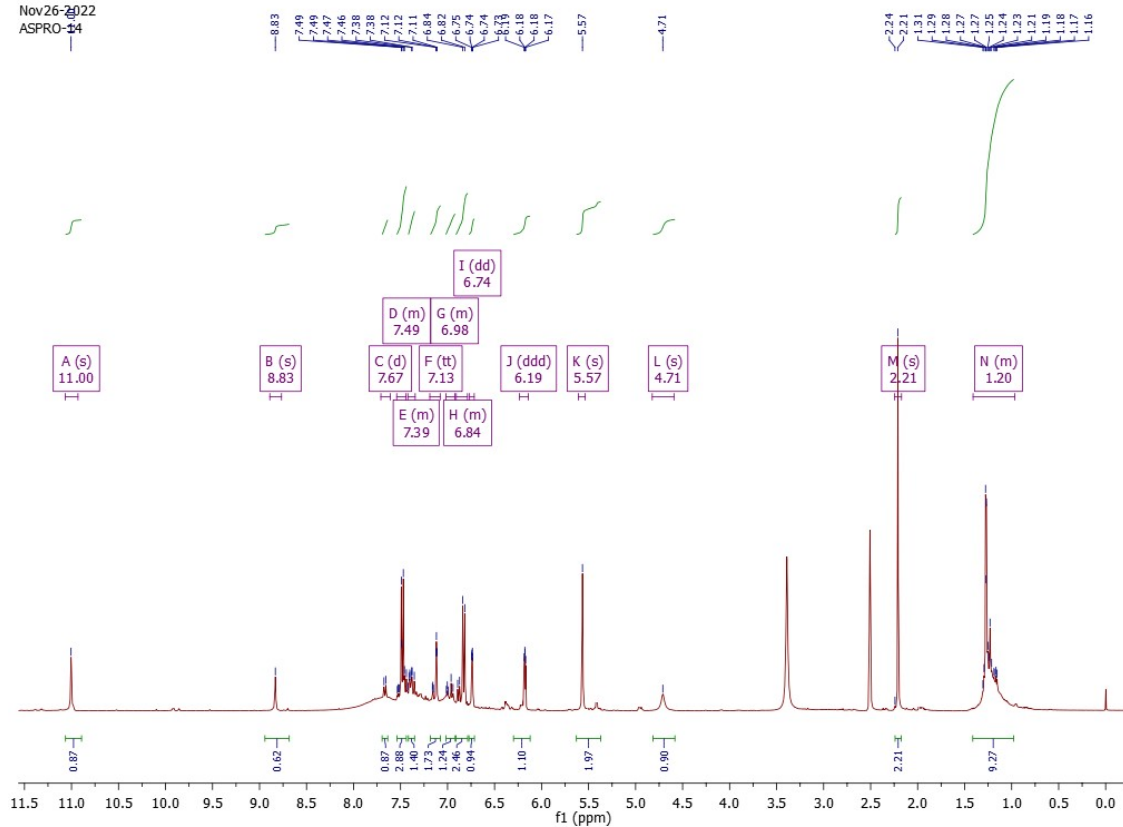

<sup>13</sup>C NMR  
spectrum  
of  
compound **3h**  
in  
DMSO-  
d<sub>6</sub>.

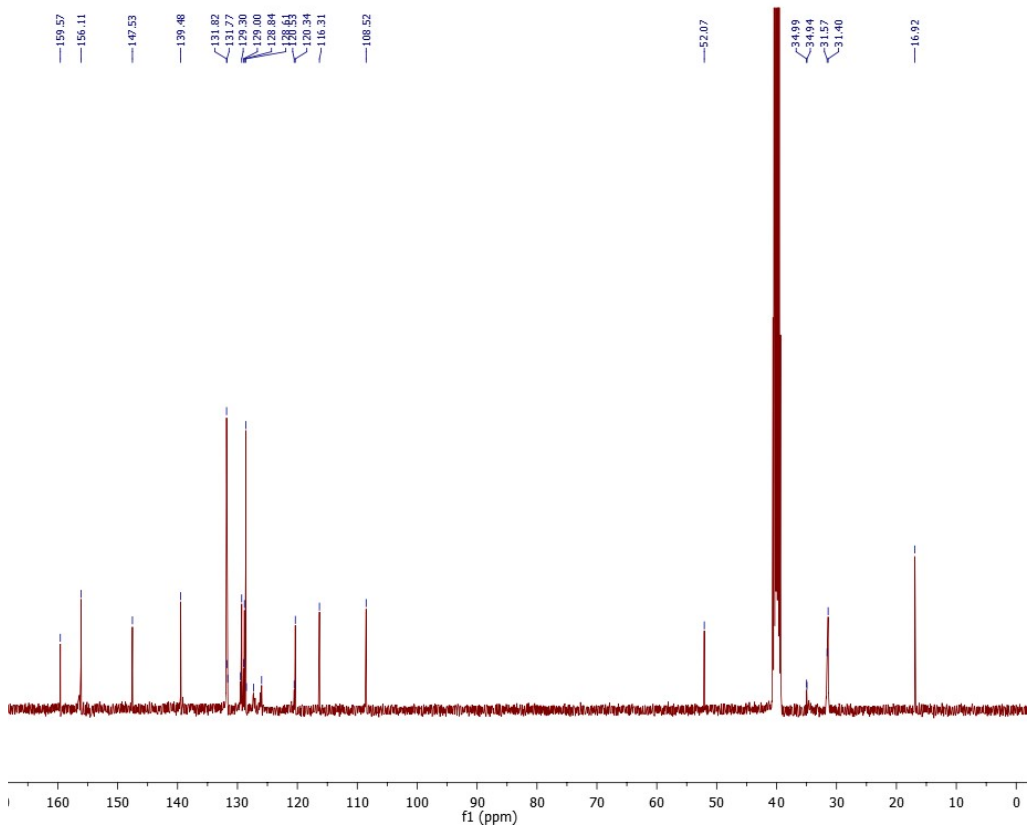

MS Zoomed Spectrum

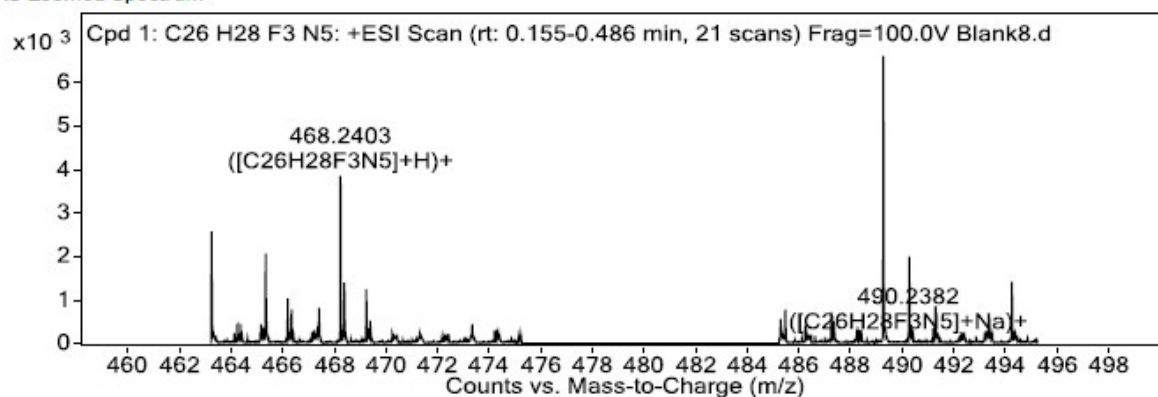

HRMS spectrum of compound **3h**.

<sup>1</sup>H NMR spectrum of compound **3i** in DMSO-d<sub>6</sub>.

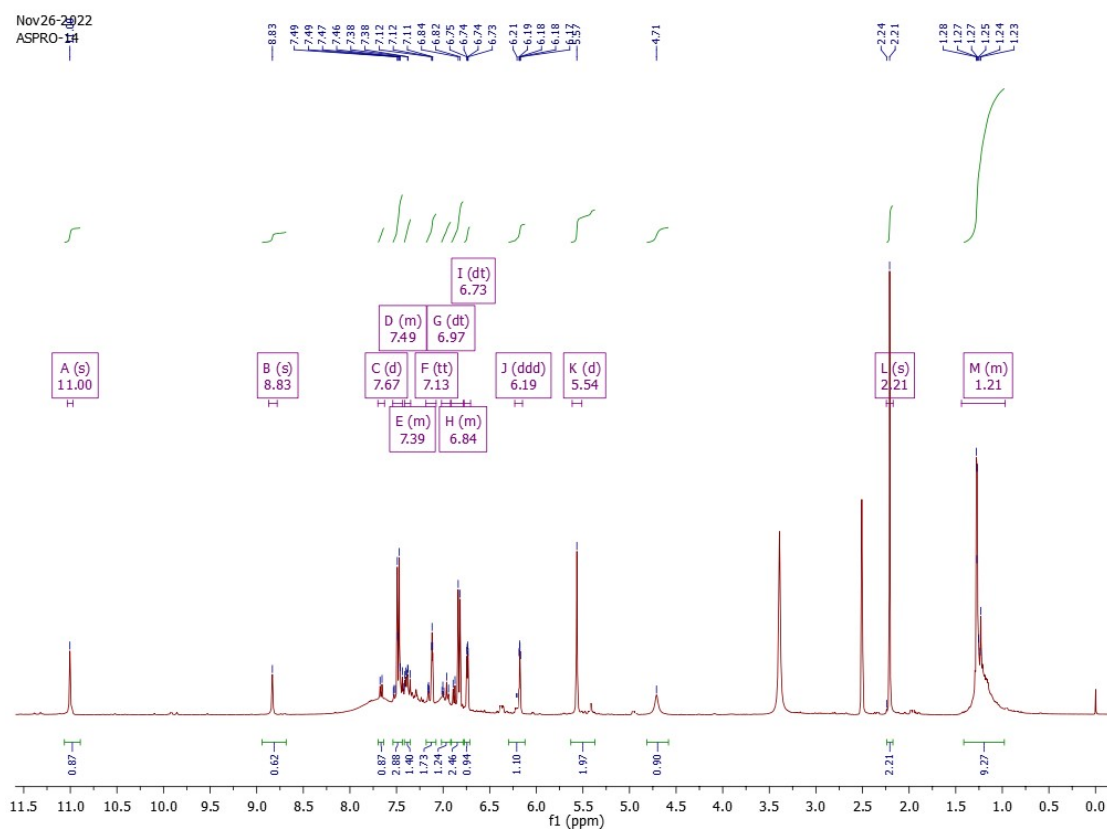

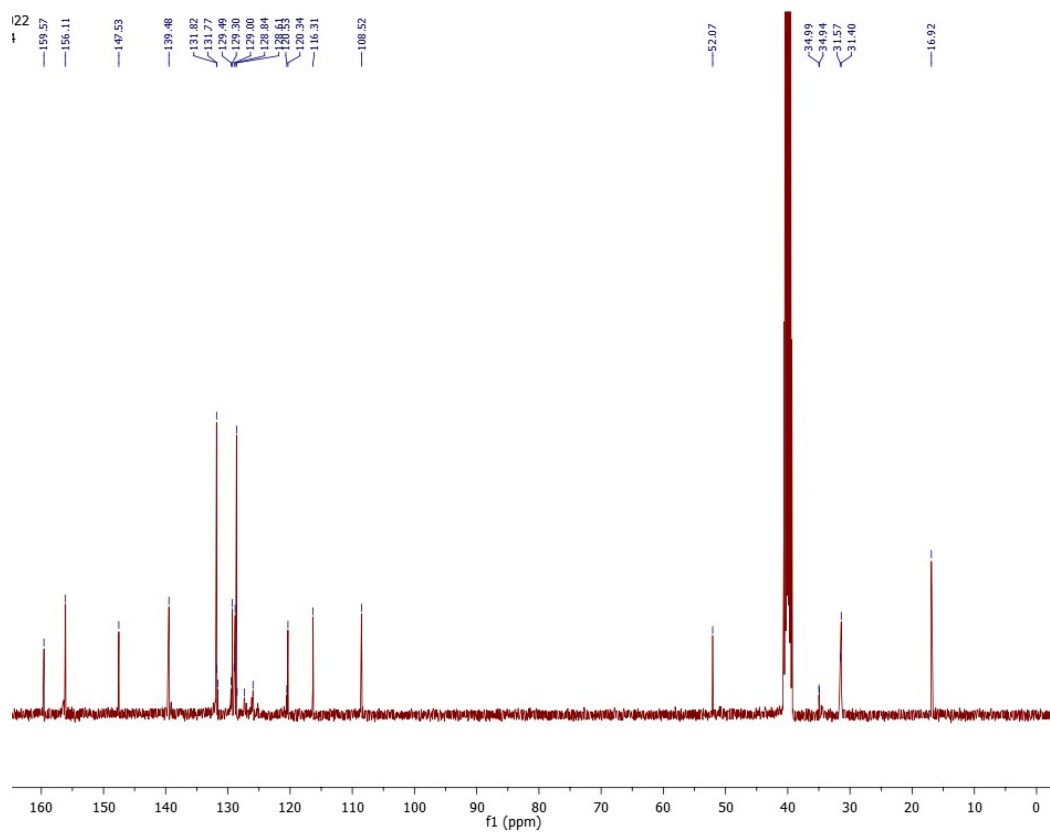

$^{13}\text{C}$   
NMR  
spectrum  
of  
compound **3i** in  
DMSO-  
 $\text{d}_6$ .

HRMS spectrum of compound **3i**.

MS Zoomed Spectrum

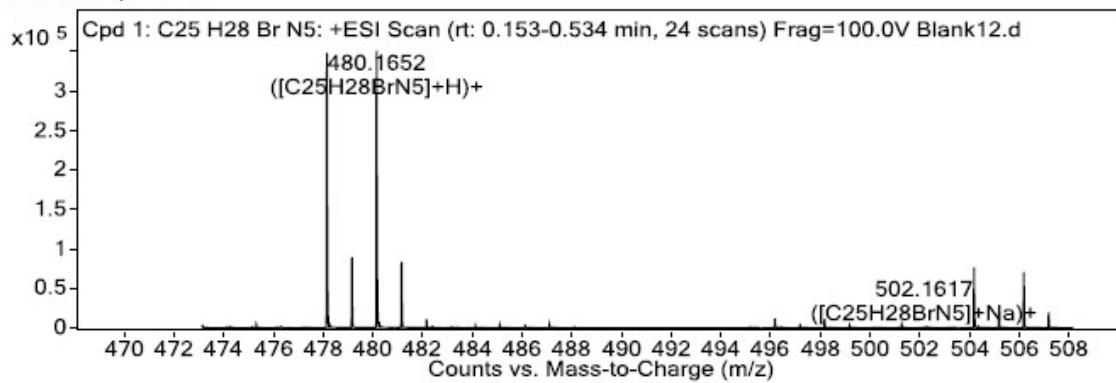

<sup>1</sup>H NMR spectrum of compound **3j** in DMSO-d<sub>6</sub>.

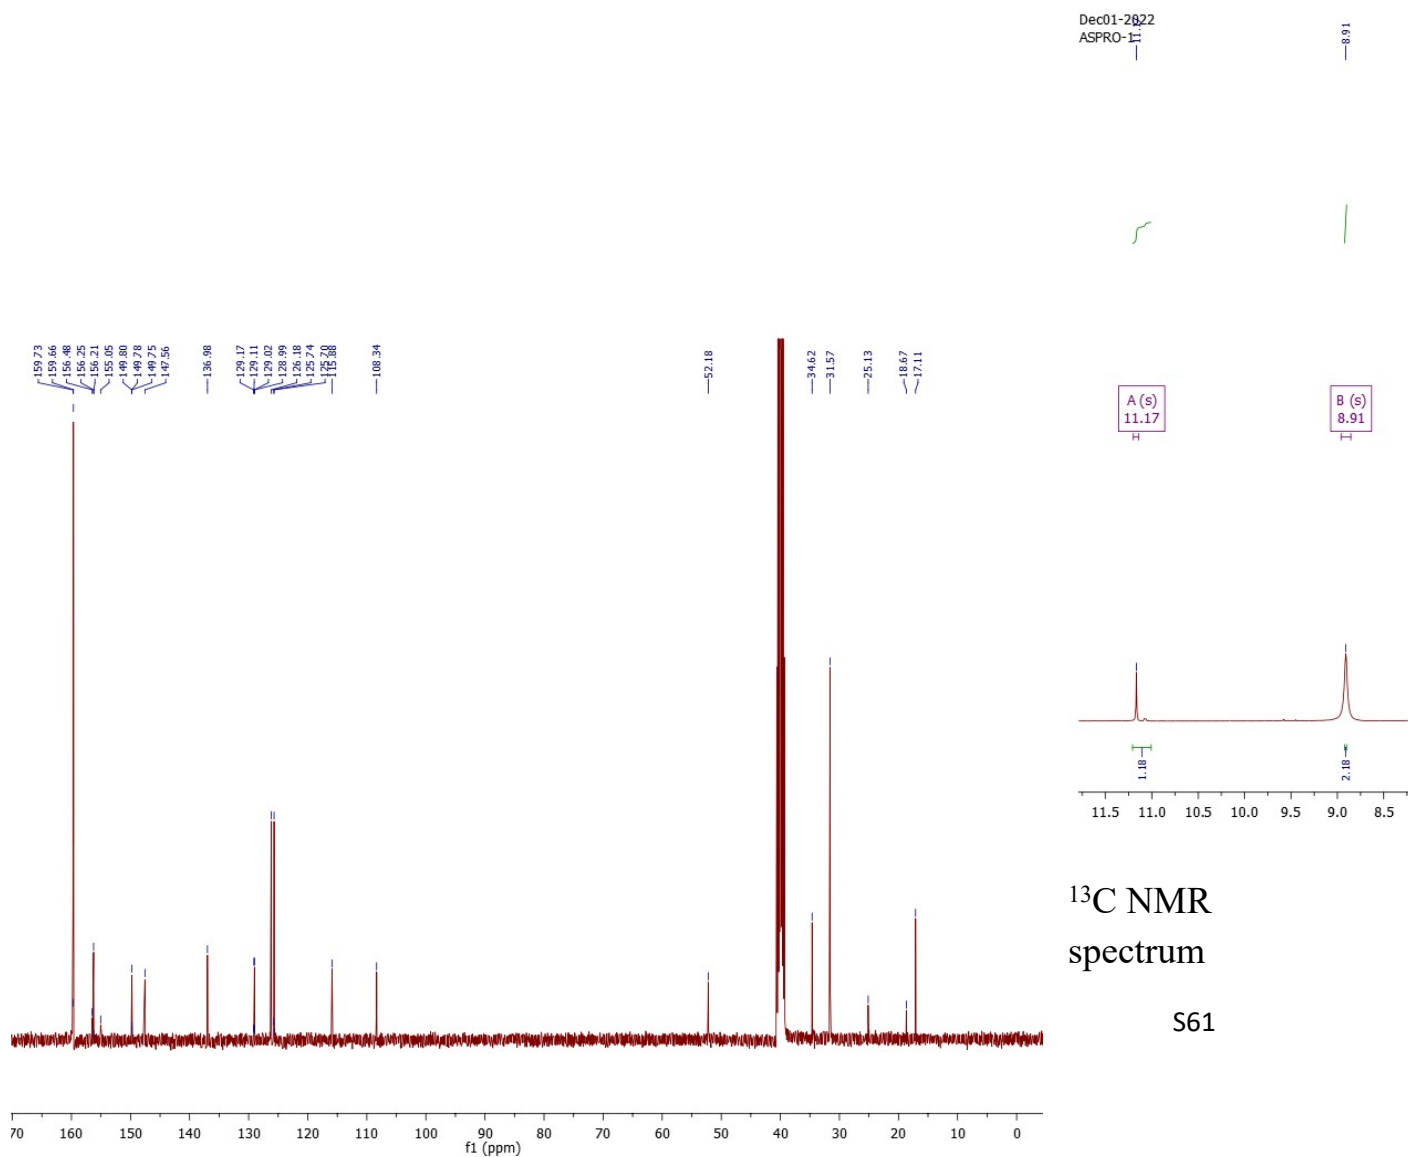

of compound **3j** in DMSO-d<sub>6</sub>.

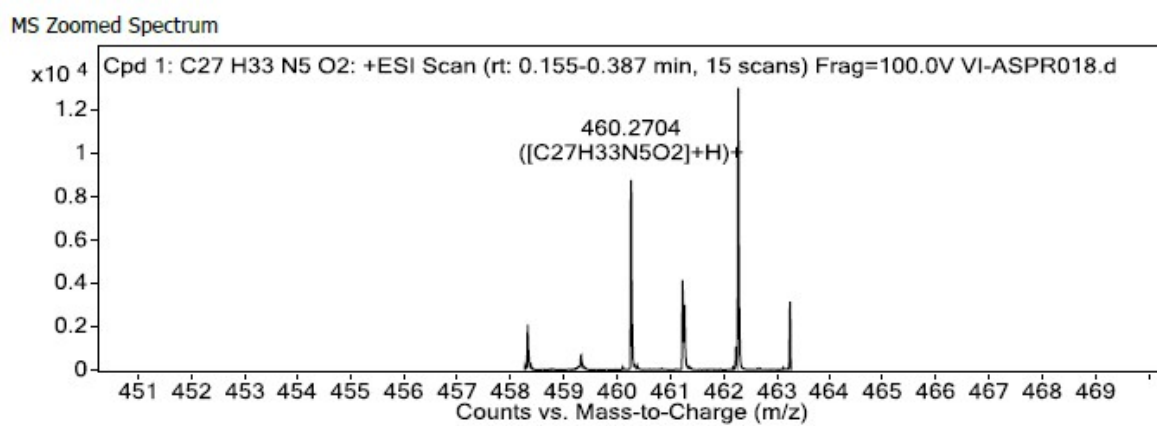

HRMS spectrum of compound **3j**.

<sup>1</sup>H NMR spectrum of compound **3k** in DMSO-d<sub>6</sub>.

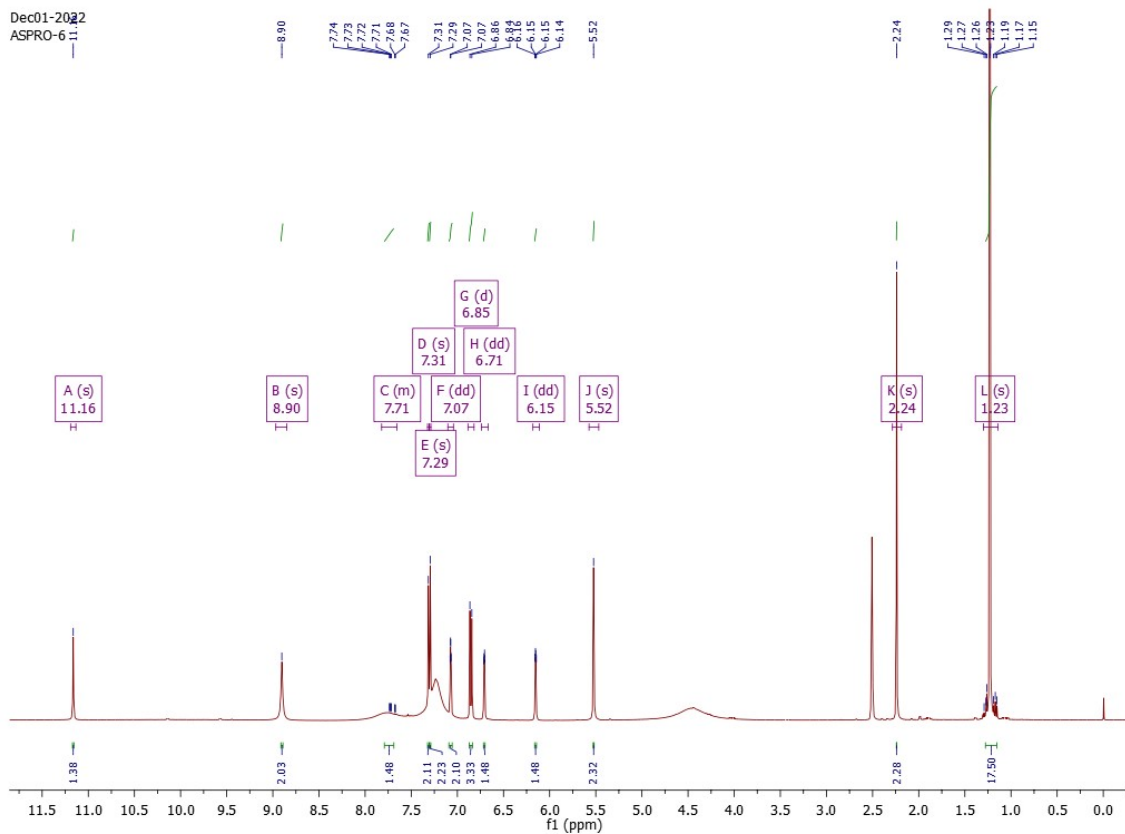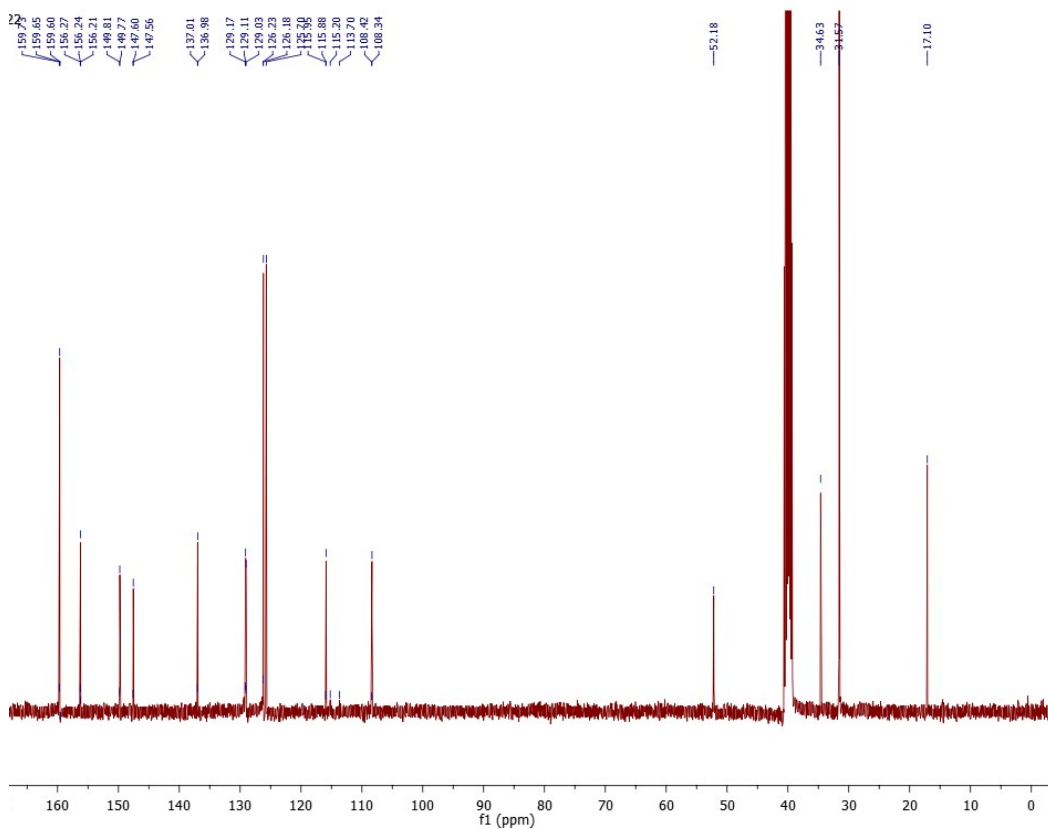

$^{13}\text{C}$   
NMR  
spectrum  
of  
compound **3k**  
in  
 $\text{DMSO-}d_6$ .

MS Zoomed Spectrum

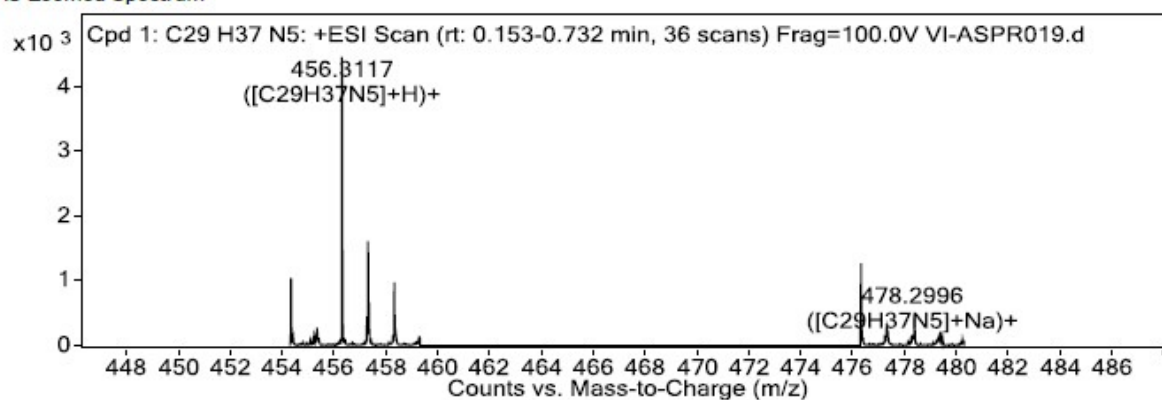

HRMS spectrum of compound **3k**.

**Table 1.** Interactions of the representative compounds in the active site of BACE 1 (6UWP)

| Compounds | Glide score | Hydrogen Bonds Interacting residues and bonding | Hydrophobic Interactions |
|-----------|-------------|-------------------------------------------------|--------------------------|
|           |             |                                                 |                          |



|           | (Kcal/mol) | distance                                                                                                                    |                                                                                                                                                                                                         |
|-----------|------------|-----------------------------------------------------------------------------------------------------------------------------|---------------------------------------------------------------------------------------------------------------------------------------------------------------------------------------------------------|
| <b>1c</b> | -9.35      | Asp32 (1.85Å), Asp228 (2.49 Å), Thr231 (2.44 Å), Asn233 (2.48 Å), Ser325 (1.59 Å)                                           | Tyr71 ( $\pi$ - $\pi$ stacked, 3.42 Å), Gln73 ( $\pi$ - $\pi$ stacked, 2.54 Å), Thr231 ( $\pi$ - $\pi$ stacked, 1.79 Å), Thr232 ( $\pi$ - $\pi$ stacked, 2.34 Å)                                        |
| <b>1d</b> | -8.22      | Asp228 (1.80Å)                                                                                                              | Asp228 (salt bridge, 2.79Å)                                                                                                                                                                             |
| <b>1j</b> | -8.03      | Asp32 (2.43Å and 1.89Å), Asp228 (2.14 Å), Tyr198 (1.65 Å), Ser35 (1.45Å)                                                    | Tyr71 ( $\pi$ - $\pi$ stacked, 4.02Å), Trp76 ( $\pi$ - $\pi$ stacked, 2.80Å), Ile126 ( $\pi$ - $\pi$ stacked, 5.49 Å), Ile226 ( $\pi$ - $\pi$ stacked, 3.25 Å), Val332 ( $\pi$ - $\pi$ stacked, 2.58 Å) |
| <b>2c</b> | -8.58      | Asp32 (1.99Å and 1.89Å), Asp228 (1.94 Å), Phe108 (1.65 Å), Ser10 (2.64 Å), Thr232 (1.32 Å), Gly230 (1.24 Å), Gly13 (1.84 Å) | Tyr71 ( $\pi$ - $\pi$ stacked, 2.22 Å), Gln12 (halogen bond, 1.59 Å), Ser229 (halogen bond, 2.34 Å), Thr231 (halogen bond, 1.57 Å)                                                                      |
| <b>2h</b> | -7.94      | Asp32 (1.96Å and 1.75Å), Asp228 (2.31 Å), Thr232 (1.35 Å), Phe108 (1.88 Å)                                                  | Thr231 ( $\pi$ - $\pi$ stacked, 1.54 Å), Gly11 ( $\pi$ - $\pi$ stacked, 2.11 Å), Ser10 ( $\pi$ - $\pi$ stacked, 2.55 Å), Ile110 ( $\pi$ - $\pi$ stacked, 2.36 Å)                                        |
| <b>2j</b> | -8.64      | Asp32 (2.40Å), Asp228 (2.11 and 1.75 Å)                                                                                     | Tyr71 ( $\pi$ - $\pi$ stacked, 5.28 Å), Arg128 ( $\pi$ -cation, 3.26 Å), Asp228 (salt bridge, 2.71Å)                                                                                                    |
| <b>2k</b> | -7.69      | Asp32 (2.16 and 1.88Å), Asp228 (1.71Å)                                                                                      | Tyr71 ( $\pi$ - $\pi$ stacked, 3.99 Å)                                                                                                                                                                  |
| <b>2l</b> | -6.22      | Asp32 (1.74 and 1.90Å)                                                                                                      | Asp228 (salt bridge, 4.99 Å), Asp32 (salt bridge, 2.76Å)                                                                                                                                                |
| <b>2m</b> | -7.34      | Ile126 (2.15Å), Asn37 (1.89Å), Trp76 (2.54Å)                                                                                | Gln73 (halogen bond, 3.25Å), Tyr71 ( $\pi$ - $\pi$ stacked, 3.35 Å)                                                                                                                                     |
| <b>2n</b> | -8.13      | Trp76 (2.71Å), Asn37 (1.88Å)                                                                                                | -                                                                                                                                                                                                       |
| <b>3e</b> | -9.87      | Asp32 (1.57 and 2.50Å), Asp228 (2.25Å), Gly230                                                                              | Tyr71 ( $\pi$ - $\pi$ stacked, 2.34 Å)                                                                                                                                                                  |

|           |       |                                                                             |                                                         |
|-----------|-------|-----------------------------------------------------------------------------|---------------------------------------------------------|
|           |       | (1.34 Å), Arg235 (1.25 Å), Thr72 (1.58 Å), Thr71 (2.31 Å), Lys107 (1.75 Å), |                                                         |
| <b>3k</b> | -9.35 | Asp32 (1.77 and 2.12Å)                                                      | Asp228 (salt bridge, 4.81Å), Asp32 (salt bridge, 2.93Å) |

**Table 2.** Interactions of the representative compounds in the active site of AChE (4EY7)

| Compounds | Glide score (Kcal/mol) | Hydrogen Bonds Interacting residues and bonding distance                                                             | Hydrophobic Interactions                                                                                                                                                                                                                 |
|-----------|------------------------|----------------------------------------------------------------------------------------------------------------------|------------------------------------------------------------------------------------------------------------------------------------------------------------------------------------------------------------------------------------------|
| <b>1a</b> | -10.07                 | Ser203 (1.87Å)                                                                                                       | Phe338 ( $\pi$ - $\pi$ stacked, 5.05 Å)                                                                                                                                                                                                  |
| <b>1c</b> | -11.47                 | His447 (1.64 and 2.12Å), Asp74 (1.85Å), Gly121 (1.75Å), Ser125 (1.35Å), Val73 (1.38Å), Asn87 (2.15Å), Pro88 (1.68Å), | Tyr124 ( $\pi$ - $\pi$ stacked, 4.27 Å), His447 ( $\pi$ - $\pi$ stacked, 4.21 Å), Tyr337 ( $\pi$ - $\pi$ stacked, 3.85 Å), Trp86 ( $\pi$ - $\pi$ stacked, 2.75 Å)                                                                        |
| <b>1d</b> | -10.12                 | His447 (2.38Å)                                                                                                       | Trp86 ( $\pi$ -cation, 3.12 Å), Phe338 ( $\pi$ - $\pi$ stacked, 5.47 Å), His447 ( $\pi$ - $\pi$ stacked, 5.01 Å), Tyr341 ( $\pi$ - $\pi$ stacked, 3.98 Å),                                                                               |
| <b>1j</b> | -12.26                 | Asp74 (2.22Å), Tyr341 (1.74Å), His447 (2.14Å), Gly121 (1.22Å), Tyr133 (2.35Å),                                       | Gly120 ( $\pi$ - $\pi$ stacked, 3.68Å), Leu130 ( $\pi$ - $\pi$ stacked, 3.97 Å), Glu202 ( $\pi$ - $\pi$ stacked, 2.82 Å), Trp86 ( $\pi$ - $\pi$ stacked, 1.89 Å), His447 ( $\pi$ - $\pi$ stacked, 2.48 Å)                                |
| <b>2c</b> | -11.31                 | Ser203 (2.80Å), His447 (2.14 and 2.12Å), Gly121 (1.36Å), Phe338 (1.59Å)                                              | Tyr124 ( $\pi$ - $\pi$ stacked, 3.65 Å), Ser125 ( $\pi$ - $\pi$ stacked, 2.31Å), Trp86 ( $\pi$ - $\pi$ stacked, 3.43 Å), Tyr337 ( $\pi$ - $\pi$ stacked, 1.45 Å), Tyr337 (halogen bond, 1.45 Å), Phe338 ( $\pi$ - $\pi$ stacked, 1.35 Å) |
| <b>2h</b> | -12.59                 | Ser125 (2.15 and 2.12Å), Gly120 (1.36 and 2.36Å),                                                                    | Trp86 ( $\pi$ - $\pi$ stacked, 3.42 Å), Tyr341 ( $\pi$ - $\pi$ stacked, 2.37 Å),                                                                                                                                                         |

|           |        |                                                                                                                                           |                                                                                                                                                                           |
|-----------|--------|-------------------------------------------------------------------------------------------------------------------------------------------|---------------------------------------------------------------------------------------------------------------------------------------------------------------------------|
|           |        | Trp86 (1.37Å), Gly121 (2.68Å), Asp74 (1.39Å), Tyr341 (3.49Å), Gly448 (1.29Å)                                                              | Tyr337 ( $\pi$ - $\pi$ stacked, 1.39 Å), Phe338 ( $\pi$ - $\pi$ stacked, 2.49 Å), Gly448 ( $\pi$ - $\pi$ stacked, 2.31 Å), His447 (halogen bond, 2.24Å),                  |
| <b>2j</b> | -6.29  | Glu202 (2.07Å)                                                                                                                            | Phe338 ( $\pi$ - $\pi$ stacked, 4.37 Å), Tyr124 ( $\pi$ - $\pi$ stacked, 5.41 Å)                                                                                          |
| <b>2k</b> | -12.54 | -                                                                                                                                         | Trp86 ( $\pi$ - $\pi$ stacked, 5.00 and 5.23 Å), Phe338 ( $\pi$ - $\pi$ stacked, 3.97Å), Tyr341 ( $\pi$ - $\pi$ stacked, 4.93 Å), Trp286 ( $\pi$ - $\pi$ stacked, 4.21 Å) |
| <b>2l</b> | -10.15 | Glu202 (1.91 and 2.08Å), Phe295 (2.21Å)                                                                                                   | Tyr124 ( $\pi$ - $\pi$ stacked, 5.40 Å), Tyr337 ( $\pi$ - $\pi$ stacked, 3.90Å), Glu202 (salt bridge, 3.02Å)                                                              |
| <b>2m</b> | -10.04 | His447 (2.08Å)                                                                                                                            | Phe338 ( $\pi$ - $\pi$ stacked, 4.87 Å), Tyr124 ( $\pi$ - $\pi$ stacked, 5.47Å), Tyr72 (halogen bond, 3.39 Å), Asp74 (halogen bond, 2.84Å)                                |
| <b>2n</b> | -9.99  | Glu202 (2.20Å)                                                                                                                            | Tyr124 ( $\pi$ - $\pi$ stacked, 5.43 and 5.45Å), Tyr341 ( $\pi$ - $\pi$ stacked, 3.85Å),                                                                                  |
| <b>2p</b> | -10.14 | Glu202 (2.16Å), His447 (2.22Å)                                                                                                            | Tyr124 ( $\pi$ - $\pi$ stacked, 5.49Å), His447 ( $\pi$ - $\pi$ stacked, 5.27Å), Phe338 ( $\pi$ - $\pi$ stacked, 4.32Å), Tyr341 ( $\pi$ - $\pi$ stacked, 3.91Å)            |
| <b>2q</b> | -9.08  | Glu202 (2.00 and 1.77Å)                                                                                                                   | His447 ( $\pi$ - $\pi$ stacked, 5.25Å), Tyr124 ( $\pi$ - $\pi$ stacked, 5.40Å), Tyr341 ( $\pi$ - $\pi$ stacked, 3.75Å)                                                    |
| <b>3e</b> | -11.47 | Tyr341 (2.04Å), Phe295 (2.25Å), Val294 (1.65Å), Ser293 (2.38Å), Arg296 (1.28Å), Tyr337 (1.49Å), His447 (2.04 and 1.77Å), Trp86 and 1.54Å) | Trp86 ( $\pi$ - $\pi$ stacked, 3.23 and 2.31Å), Trp286 ( $\pi$ - $\pi$ stacked, 4.46Å), Phe297 ( $\pi$ - $\pi$ stacked, 1.83Å)                                            |

|           |        |               |                                                                       |
|-----------|--------|---------------|-----------------------------------------------------------------------|
| <b>3k</b> | -12.73 | Asp74 (2.03Å) | Tyr337 ( $\pi$ - $\pi$ stacked, 5.48Å),<br>Asp74 (salt bridge, 2.95Å) |
|-----------|--------|---------------|-----------------------------------------------------------------------|
